# Supplementary material for: Workplace Energy Culture Framework: A Mixed Methods Study Examining Differences in Energy Use and Behaviours within an Industrial Workplace
Source: MDPI journal article supplement (doi:10.3390/su16073072), 2024-04-07

## Further information on survey design and PCA groupings

The survey questions were designed to examine a) the norms and practices themes of the Energy Culture Framework, and b) the wider external influences on employee energy behaviours. They were loosely designed around the following themes:

- Colleagues/work team energy actions
- Workplace energy efficiency and reduction knowledge
- Organisational influences
- Energy concern and business concern
- Workplace Energy Reduction Practices
- Employee energy suggestions and communication
- Perceived pressure from line manager and colleagues
- Attitudes and energy practices at home
- Energy importance for business

The PCA process grouped the majority of items in a similar way to the themes above, however there was some variations. Table 1 provides further details on the composition of the questions in each PCA group and what theme they were originally designed under. Table 2 lists each question in each PCA grouping, and highlights the original design theme. It also details how each question was developed and stated the source of the question where appropriate.

*Table 1: Comments on the PCA suggested grouping of factors (questions) and how they are similar or different to the original questionnaire design themes*

| PCA Group                                           | Similarities and differences to the design themes                                                                                                                                                                                                                                                                                                                                                                                                         |
|-----------------------------------------------------|-----------------------------------------------------------------------------------------------------------------------------------------------------------------------------------------------------------------------------------------------------------------------------------------------------------------------------------------------------------------------------------------------------------------------------------------------------------|
| 1 - Employee attitudes and subjective norms         | This group includes all questions that were originally designed in the themes of ' <i>Colleagues/Work team energy/actions</i> ' and ' <i>Perceived pressure from line manager and colleagues</i> '. It also includes one variable originally designed under the ' <i>Organisational influence</i> ' group. Reviewing the PCA grouping of these questions highlighted they all address employee attitudes and subjective norms.                            |
| 2 - Employee energy suggestions and feedback        | This group includes all the questions that were originally designed in ' <i>Employee energy suggestions and communications</i> ' are in this grouping.                                                                                                                                                                                                                                                                                                    |
| 3 - Concern of business energy use, demand and cost | This group includes all the questions that were originally designed in the ' <i>Energy concern and business concern</i> ' and ' <i>Energy importance for business</i> ' themes. Reviewing the PCA grouping of these questions highlighted they all address ' <i>concern of business energy use, demand and cost</i> '.                                                                                                                                    |
| 4 - Home Energy Practices                           | This group consists of all the questions that were originally designed in the ' <i>Attitudes and energy practices at home</i> ' theme and also has the addition of one question which was originally themed in the ' <i>Energy concern and business concern</i> ' group. The wording of this question did not specify workplace behaviours, and asks generally about day-to-day behaviours which fits with the theme of ' <i>home energy practices</i> '. |
| 5 - Workplace Energy Reduction Practices            | This group includes all the questions originally designed in the ' <i>Workplace energy behaviours/actions/self-reporting</i> ' theme.                                                                                                                                                                                                                                                                                                                     |
| 6 - Workplace Energy Reduction Knowledge            | This group includes questions which were previously grouped together in the ' <i>Work place energy efficiency and Reduction Knowledge</i> ' theme.                                                                                                                                                                                                                                                                                                        |
| 7 - Workplace Energy Approaches                     | This is a mixed group, which consists of questions previously grouped under the themes of ' <i>organisational influence</i> ' and ' <i>Workplace Energy Efficiency and Reduction Knowledge</i> ' themes. Even though this group consists of a variety of variables, reviewing the PCA grouping identifies that all these questions examine ' <i>workplace energy approaches</i> '.                                                                        |
| 8 - Role of the SHE function                        | Includes two variables that were originally grouped together in the ' <i>organisational influence</i> ' theme. However, these questions specifically ask about the SHE function within the business, so this was an appropriate categorisation.                                                                                                                                                                                                           |

Table 2: The PCA groups and the questions included in each group, along with details on how each question was developed including information on whether they were researcher developed, adapted or directly from other sources. Final column of table highlights the original theme that the question was developed to address. \*\* highlights where a question was originally designed under a slightly different theme

| PCA Grouping                                        | Questions                                                                                                              | Details on how the question was developed                                                                                                                                                                                                                                                                                                                                                                                        | Theme of initial survey design                     |
|-----------------------------------------------------|------------------------------------------------------------------------------------------------------------------------|----------------------------------------------------------------------------------------------------------------------------------------------------------------------------------------------------------------------------------------------------------------------------------------------------------------------------------------------------------------------------------------------------------------------------------|----------------------------------------------------|
| 1 – Employee attitudes and subjective norms         | Within my specific work team we are conscious of our energy use                                                        | Similar to Dixon et al., (2014:124) ‘Most people I work with, who are important to me, try to pay attention to their energy use’                                                                                                                                                                                                                                                                                                 | Colleague/ work team energy actions                |
|                                                     | Within my work environment energy use and demand are discussed regularly                                               | Adapted from Ucci et al., (2014:45) Q16                                                                                                                                                                                                                                                                                                                                                                                          | Colleague/ work team energy actions                |
|                                                     | I discuss ways to reduce energy use and demand with my work colleagues                                                 | Ucci et al., (2014:45) Q16                                                                                                                                                                                                                                                                                                                                                                                                       | Colleague/ work team energy actions                |
|                                                     | Within my specific work team we regularly try to reduce our energy use                                                 | Similar to Dixon et al., (2014:124) ‘Many people I work with are trying to reduce their energy use’                                                                                                                                                                                                                                                                                                                              | Colleague/ work team energy actions                |
|                                                     | I would be well thought of by my colleagues if I took action to save energy at work                                    | Ucci et al., (2014:45) Q17                                                                                                                                                                                                                                                                                                                                                                                                       | **Pressure from line manager / colleagues          |
|                                                     | My line manager influences my energy use                                                                               | Researcher developed but influence by subject norm theme of Ajzen (1991) Theory of Planned behaviour.                                                                                                                                                                                                                                                                                                                            | **Organisational influences                        |
|                                                     | I would be well thought of by my line manager if I took actions to save energy at work                                 | Ucci et al., (2014:45) Q18                                                                                                                                                                                                                                                                                                                                                                                                       | **Pressure from line manager / colleagues          |
|                                                     | Colleagues within my work environment support the need to reduce energy use                                            | Ucci et al., (2014:45) Q18<br>Also similar to Dixon et al., (2014:124) ‘any people I work with are trying to reduce their energy use’                                                                                                                                                                                                                                                                                            | Colleague/ work team energy actions                |
| 2 – Employee energy suggestions and feedback        | If I make a suggestion on how to reduce energy use and demand it will be taken seriously                               | This block of questions were developed in response to the pilot study. During the pilot study some participants stated they were uncertain whether their views were being heard and acted upon.                                                                                                                                                                                                                                  | Employee energy suggestions and communication      |
|                                                     | If I make a suggestion, I will receive a response detailing any changes or reasons for not implementing the suggestion |                                                                                                                                                                                                                                                                                                                                                                                                                                  | Employee energy suggestions and communication      |
|                                                     | Employees are encouraged to make suggestions which can reduce energy use and demand                                    |                                                                                                                                                                                                                                                                                                                                                                                                                                  | Employee energy suggestions and communication      |
|                                                     | If I have a suggestion on how to reduce energy use and demand at work I know who to speak to                           |                                                                                                                                                                                                                                                                                                                                                                                                                                  | Employee energy suggestions and communication      |
| 3 – Concern of business energy use, demand and cost | Reducing energy demand should be a higher priority for the business                                                    | Adapted from Ucci et al., (2014:42) Q2                                                                                                                                                                                                                                                                                                                                                                                           | Energy concern and business concern                |
|                                                     | Energy demand is an important issue for the business                                                                   | Ucci et al., (2014:43) Q8                                                                                                                                                                                                                                                                                                                                                                                                        | **Energy importance for business                   |
|                                                     | Reducing energy use should be a higher priority for the business                                                       | Adapted from Ucci et al., (2014:42) Q2                                                                                                                                                                                                                                                                                                                                                                                           | Energy concern and business concern                |
|                                                     | Energy use is an important issue for the business                                                                      | Ucci et al., (2014:43) Q8                                                                                                                                                                                                                                                                                                                                                                                                        | **Energy importance for business                   |
|                                                     | I am concerned about the cost of energy to the business                                                                | Researcher developed to examine energy attitudes in the workplace                                                                                                                                                                                                                                                                                                                                                                | Energy concern and business concern                |
| 4 – Home Energy Practices                           | At home I always make an effort to reduce energy use                                                                   | Researcher developed, with influence from Lee et al., (1995) and the questions developed in workplace energy.                                                                                                                                                                                                                                                                                                                    | Attitude and energy practices at home              |
|                                                     | At home I always leave electrical goods off at the mains socket when not in use                                        |                                                                                                                                                                                                                                                                                                                                                                                                                                  | Attitude and energy practices at home              |
|                                                     | At home I am concerned about rising energy prices                                                                      |                                                                                                                                                                                                                                                                                                                                                                                                                                  | Attitude and energy practices at home              |
|                                                     | At home I always turn lights off after I leave a room                                                                  |                                                                                                                                                                                                                                                                                                                                                                                                                                  | Attitude and energy practices at home              |
|                                                     | I am concerned that rising energy costs will affect my day-to-day tasks                                                |                                                                                                                                                                                                                                                                                                                                                                                                                                  | **Energy concern and business concern              |
|                                                     | At home rising costs have affected my day-to-day tasks                                                                 |                                                                                                                                                                                                                                                                                                                                                                                                                                  | Attitude and energy practices at home              |
| 5 – Workplace Energy Reduction Practices            | At work I always turn equipment, which I personally use, off after I have finished using it                            | Adapted from Dixon et al., (2014:124), Chen et al (2014:28) and Ucci et al., (2014:48) .<br>Dixon et al., (2014) use a 6 item index to examine turning off lights, putting computer to sleep or standby, printing double sided, minimising overhead lights, switching off hall/restroom lights, turn off computer monitor.<br>Chen et al., (2014) include statements which address turning off computers/lights when not in use. | Workplace energy behaviours/actions/self-reporting |
|                                                     | At work I always turn equipment off at the end of the day/shift                                                        |                                                                                                                                                                                                                                                                                                                                                                                                                                  | Workplace energy behaviours/actions/self-reporting |
|                                                     | At work I always make an effort to reduce energy use within the workplace                                              |                                                                                                                                                                                                                                                                                                                                                                                                                                  | Workplace energy behaviours/actions/self-reporting |

|                                          |                                                                                                   |                                                                                                                                                                                         |                                                     |
|------------------------------------------|---------------------------------------------------------------------------------------------------|-----------------------------------------------------------------------------------------------------------------------------------------------------------------------------------------|-----------------------------------------------------|
|                                          | At work if I am the only person in an area, I always turn lights off after I leave that area      | Ucci et al., (2014) includes statements such as ‘When I leave a room/space that is unoccupied, I always turn off the lights, I always turn off a piece of machinery during down times’. | Workplace energy behaviours/actions/self-reporting  |
| 6 – Workplace Energy Reduction Knowledge | It is clear to me who is responsible for switching off the lights                                 | Ucci et al., (2014:46) Q24                                                                                                                                                              | Workplace Energy Reduction Knowledge                |
|                                          | It is clear to me who is responsible for switching machines/equipment off during downtimes        | Ucci et al., (2014:48) Q23                                                                                                                                                              | Workplace Energy Reduction Knowledge                |
|                                          | If I wanted to turn equipment/machines off in my work area I know where the relevant switches are | Ucci et al., (2014:47) F21                                                                                                                                                              | Workplace Energy Reduction Knowledge                |
| 7 – Workplace Energy Approaches          | I have received enough training on energy saving at work                                          | Ucci et al., (2014:44) Q15                                                                                                                                                              | **Organisational influences                         |
|                                          | I get enough supervision and guidance on saving energy at work                                    | Ucci et al., (2014:44) Q13                                                                                                                                                              | **Organisational influences                         |
|                                          | It is clear to me what the business are doing to reduce energy use and demand                     | Ucci et al., (2014:43) Q9                                                                                                                                                               | Workplace Energy Efficiency and Reduction Knowledge |
|                                          | I know the amount of energy my team/department use                                                | Ucci et al., (2014:44) Q10                                                                                                                                                              | Workplace Energy Efficiency and Reduction Knowledge |
| 8 – Role of the SHE function             | The SHE function influence how I use energy in work                                               | Developed in response to the pilot study, where participants highlighted how the SHE function has a role in their day-to-day tasks and energy use.                                      | Organisational influences                           |
|                                          | I associate energy related topics with the SHE function                                           |                                                                                                                                                                                         | Organisational influences                           |

Questions originally in survey but removed during the PCA process

|                                                                                                      |                                                                                                            |
|------------------------------------------------------------------------------------------------------|------------------------------------------------------------------------------------------------------------|
| Q13c <i>‘If I notice a fault with equipment I am using, I always report this to my line manager’</i> | Adapted from Ucci et al., (2014) Page 48 Q32                                                               |
| Q13d <i>I am more conscious of energy use than my work colleagues’</i>                               | Researcher developed                                                                                       |
| Q14b <i>at home ‘I always leave electrical goods on standby when not in use’</i>                     | Adapted from Dixon et al., (2014:124), Chen et al (2014:28) and Ucci et al., (2014:48) (similar to above). |

## **Aim of focus groups**

- **Can more understanding of the energy cultures of the manufacturing and office environments**

Do you think about how much energy your using when conducting work tasks?

Do you want to know how much energy you use?

Are energy topics discussed in the work? How is energy talked about?

Do you get information on the energy you use?

Who do you think is responsible for reducing energy in the workplace?

Do you get any training on topics related to energy use?

Are you aware of any infrastructure on site (including within different buildings) that's goal is to improve energy efficiency or reduce energy use?

Are you concerned about energy costs to the business?

Are you aware of shutdown plans for holidays?

Do you know how to turn off everything in your immediate work area?

What approaches do you think should be taken to try and reduce energy use on site?

Where do you see energy as a priority for the site? In relation to all other priorities.

## **Communication**

How do you get information?

How would you like messages to be transferred to you?

(specifically interested in manufacturing responses – those that don't use computers on day-to-day basis)

Can you make suggestions about ways to save energy? And how do you do this?

- Follow up – do you think the suggestions are taken serious?
- How would you like to offer suggestions?

## **Survey findings**

Highlight to the group that early survey findings indicate differences between office and manufacturing areas, ask the group why they think differences might exist?

Differences in manufacturing wanting more supervision and guidance than office environments.

Results of Varimax rotation of Principal Component Analysis. Component numbers correspond to the group numbers in Table 1 of main transcript.

| Variables | Components  |             |             |             |             |             |             |             | Communalities |
|-----------|-------------|-------------|-------------|-------------|-------------|-------------|-------------|-------------|---------------|
|           | 1           | 2           | 3           | 4           | 5           | 6           | 7           | 8           |               |
| Q10b      | <b>.771</b> | .018        | -.029       | .057        | .022        | .080        | .130        | .000        | .622          |
| Q10d      | <b>.719</b> | .135        | .045        | .123        | -.018       | -.008       | <b>.308</b> | -.051       | .650          |
| Q10e      | <b>.696</b> | -.002       | .000        | .177        | .039        | .083        | .159        | -.045       | .552          |
| Q10h      | <b>.690</b> | .081        | .186        | .001        | .090        | .144        | -.199       | <b>.376</b> | .727          |
| Q10c      | <b>.689</b> | .030        | .014        | .050        | .094        | .141        | .192        | .049        | .547          |
| Q10a      | <b>.637</b> | .222        | -.045       | .094        | .037        | .119        | .122        | .103        | .506          |
| Q10g      | <b>.628</b> | .067        | .119        | -.012       | -.006       | .189        | -.077       | <b>.370</b> | .591          |
| Q10f      | <b>.605</b> | .026        | .177        | .100        | .036        | .205        | .008        | .044        | .453          |
| Q9h       | .111        | <b>.953</b> | .086        | .009        | .039        | .093        | -.011       | .030        | .939          |
| Q9i       | .064        | <b>.945</b> | .015        | .031        | .017        | .041        | -.046       | -.012       | .902          |
| Q9j       | .107        | <b>.927</b> | .048        | .053        | .026        | .059        | .094        | .033        | .889          |
| Q9g       | .111        | <b>.893</b> | .031        | .038        | .089        | -.008       | .103        | .010        | .831          |
| Q9c       | .060        | .008        | <b>.731</b> | .164        | .127        | -.088       | -.048       | -.067       | .595          |
| Q9d       | .050        | .040        | <b>.692</b> | .170        | .134        | -.081       | -.043       | .003        | .538          |
| Q9a       | -.028       | -.012       | <b>.691</b> | .009        | .075        | .088        | .132        | .090        | .517          |
| Q9b       | .038        | .065        | <b>.644</b> | .018        | .103        | .102        | .117        | .098        | .466          |
| Q13a      | .226        | .068        | <b>.417</b> | .234        | -.018       | .220        | .026        | .015        | .334          |
| Q14e      | .017        | .015        | .123        | <b>.750</b> | .164        | .070        | .052        | -.019       | .613          |
| Q14c      | .025        | .059        | -.010       | <b>.629</b> | .126        | .031        | .057        | .008        | .420          |
| Q15a      | .041        | .047        | .254        | <b>.557</b> | .114        | -.071       | -.032       | .091        | .406          |
| Q14a      | .025        | -.044       | .154        | <b>.536</b> | <b>.303</b> | .014        | .004        | .181        | .439          |
| Q13b      | .280        | .117        | .239        | <b>.462</b> | -.014       | .091        | -.080       | -.015       | .378          |
| Q15b      | .168        | -.027       | -.037       | <b>.455</b> | -.032       | .032        | -.102       | .010        | .250          |
| Q12a      | .029        | .079        | .132        | .180        | <b>.850</b> | .050        | .033        | .132        | .801          |
| Q12b      | .027        | .085        | .136        | .150        | <b>.805</b> | .073        | .059        | .042        | .708          |
| Q12d      | .228        | .034        | .208        | .259        | <b>.542</b> | .288        | .117        | -.027       | .555          |
| Q12c      | .070        | -.004       | .140        | .118        | <b>.437</b> | <b>.419</b> | -.011       | -.016       | .405          |
| Q13f      | .148        | .039        | .004        | .012        | .171        | <b>.740</b> | .135        | .065        | .623          |
| Q13e      | .149        | .075        | .052        | -.006       | .097        | <b>.598</b> | .218        | .108        | .456          |
| Q13g      | .193        | .030        | -.006       | .058        | -.002       | <b>.443</b> | .039        | .042        | .242          |
| Q8b       | .228        | -.035       | .097        | -.092       | .016        | .271        | <b>.672</b> | .213        | .642          |
| Q8a       | .245        | .037        | .073        | -.081       | .044        | .293        | <b>.646</b> | .228        | .630          |
| Q9f       | <b>.419</b> | .153        | .200        | .022        | .154        | .137        | <b>.487</b> | .158        | .544          |
| Q8c       | <b>.366</b> | <b>.316</b> | -.048       | .041        | .098        | -.050       | <b>.408</b> | .051        | .419          |
| Q1db      | .111        | .045        | .021        | .022        | .015        | .105        | .173        | <b>.681</b> | .517          |
| Q1da      | .119        | -.016       | .068        | .157        | .121        | .050        | .187        | <b>.649</b> | .520          |

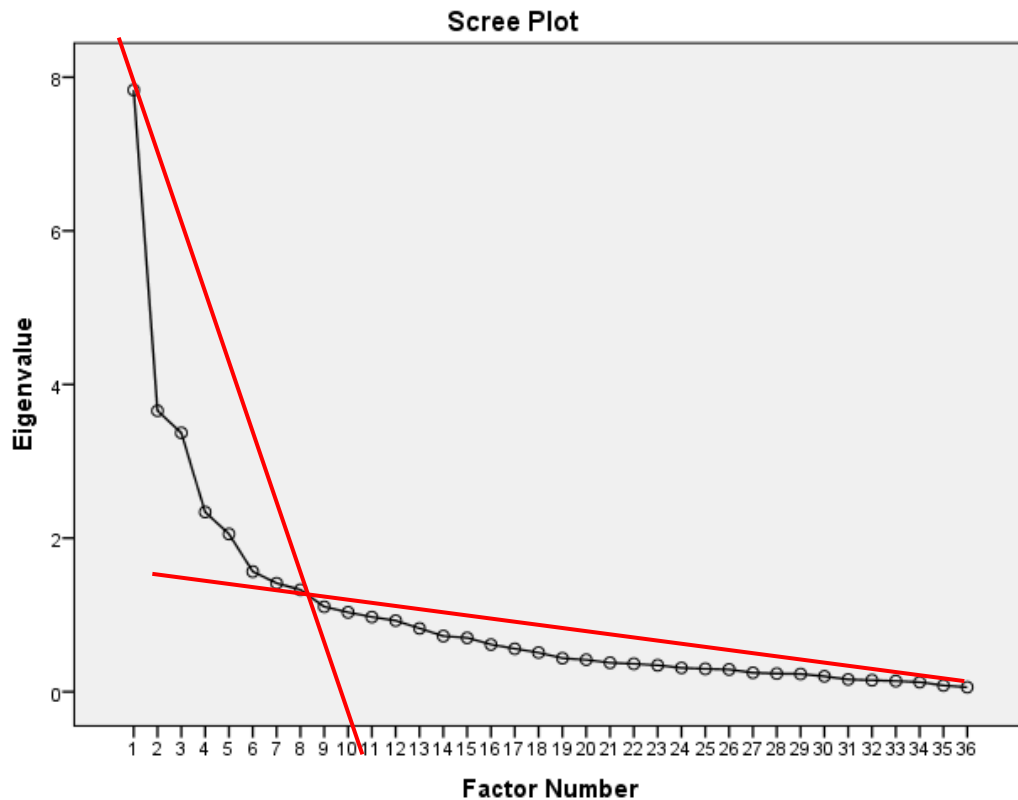

Figure 1: Scree Plot produced from PCA with Varimax Rotation Note: red lines reflect visual indications produced by the researcher

This remainder of this document first presents the outputs from SPSS detailing the independent t-test results for each group. Within each group there are multiple tests run based on whether outliers were removed from the sample. Within the output the researcher has provided notes detailing why different tests were conducted. Due to several groups not having similar distributions of data, even after the removal of outliers, Mann-Whitney U tests were conducted. The results of these tests is presented at the end of the output.

\*\*\*\*\*GROUP 1 - STEP 1  
RUN DESCRIPTIVE ANALYSIS AND T-TEST

EXAMINE VARIABLES=Group1PCA BY OfficeOrManufacturing  
/PLOT BOXPLOT HISTOGRAM NPLOT  
/COMPARE GROUPS  
/STATISTICS DESCRIPTIVES  
/INTERVAL 95  
/MISSING LISTWISE  
/NOTOTAL.

T-TEST GROUPS=OfficeOrManufacturing(1 2)  
/MISSING=ANALYSIS  
/VARIABLES=Group1PCA  
/CRITERIA=CI(.95).

What the building area is predominately used for

Case Processing Summary

|                                                  |     | Cases   |         |         |       |         |  |
|--------------------------------------------------|-----|---------|---------|---------|-------|---------|--|
| What the building area is predominately used for |     | Valid   | Missing |         | Total |         |  |
|                                                  | N   | Percent | N       | Percent | N     | Percent |  |
| Group1PCA Office                                 | 120 | 100.0%  | 0       | 0.0%    | 120   | 100.0%  |  |
| Manufacturing                                    | 136 | 100.0%  | 0       | 0.0%    | 136   | 100.0%  |  |

## Descriptives

| What the building area is predominately used for |               |                                  | Statistic   | Std. Error |
|--------------------------------------------------|---------------|----------------------------------|-------------|------------|
| Group1PCA                                        | Office        | Mean                             | 23.3333     | .56265     |
|                                                  |               | 95% Confidence Interval for Mean | Lower Bound | 22.2192    |
|                                                  |               |                                  | Upper Bound | 24.4474    |
|                                                  |               | 5% Trimmed Mean                  | 23.2500     |            |
|                                                  |               | Median                           | 23.0000     |            |
|                                                  |               | Variance                         | 37.989      |            |
|                                                  |               | Std. Deviation                   | 6.16351     |            |
|                                                  |               | Minimum                          | 8.00        |            |
|                                                  |               | Maximum                          | 40.00       |            |
|                                                  |               | Range                            | 32.00       |            |
|                                                  |               | Interquartile Range              | 8.75        |            |
|                                                  |               | Skewness                         | .199        | .221       |
|                                                  |               | Kurtosis                         | .111        | .438       |
|                                                  | Manufacturing | Mean                             | 21.6838     | .39395     |
|                                                  |               | 95% Confidence Interval for Mean | Lower Bound | 20.9047    |
|                                                  |               |                                  | Upper Bound | 22.4629    |
|                                                  |               | 5% Trimmed Mean                  | 21.7386     |            |
|                                                  |               | Median                           | 22.0000     |            |
|                                                  |               | Variance                         | 21.107      |            |
|                                                  |               | Std. Deviation                   | 4.59420     |            |
|                                                  |               | Minimum                          | 8.00        |            |
|                                                  |               | Maximum                          | 31.00       |            |
|                                                  |               | Range                            | 23.00       |            |
|                                                  |               | Interquartile Range              | 6.00        |            |
|                                                  |               | Skewness                         | -.091       | .208       |
|                                                  |               | Kurtosis                         | .135        | .413       |

## Tests of Normality

| What the building area is predominately used for |               | Kolmogorov-Smirnov <sup>a</sup> |     |       | Shapiro-Wilk |     |      |
|--------------------------------------------------|---------------|---------------------------------|-----|-------|--------------|-----|------|
|                                                  |               | Statistic                       | df  | Sig.  | Statistic    | df  | Sig. |
| Group1PCA                                        | Office        | .067                            | 120 | .200* | .988         | 120 | .379 |
|                                                  | Manufacturing | .084                            | 136 | .019  | .982         | 136 | .071 |

\*. This is a lower bound of the true significance.

a. Lilliefors Significance Correction

## Group1PCA Histograms

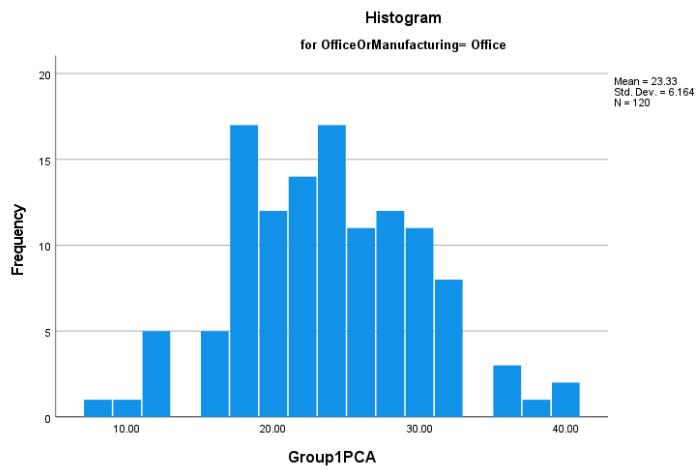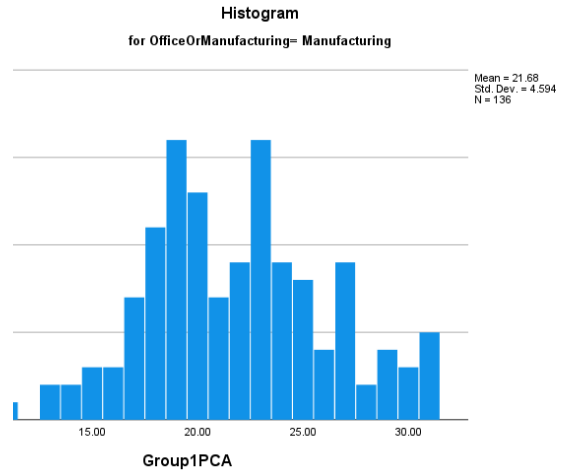

## Normal Q-Q Plots

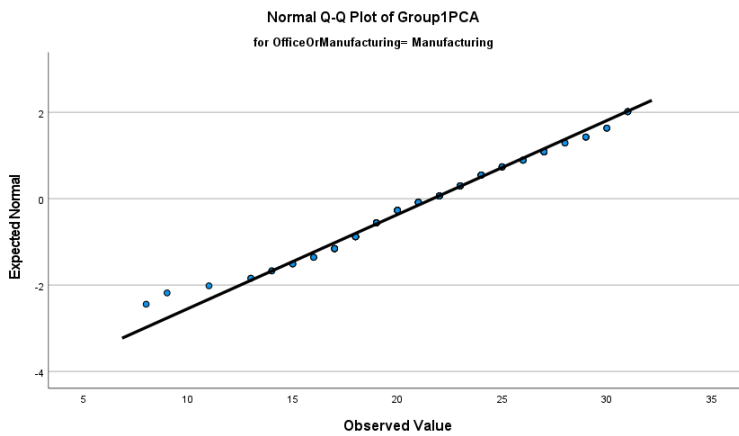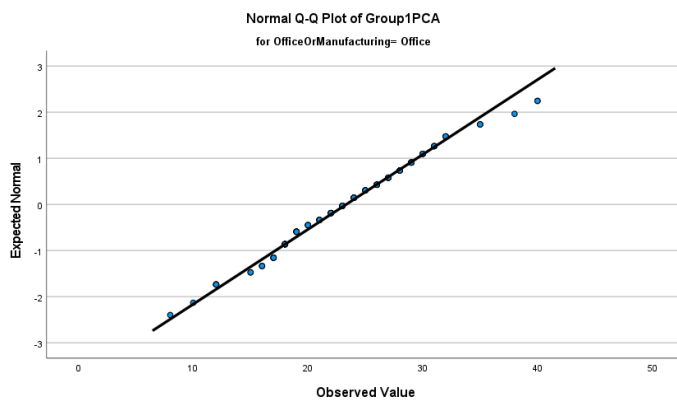



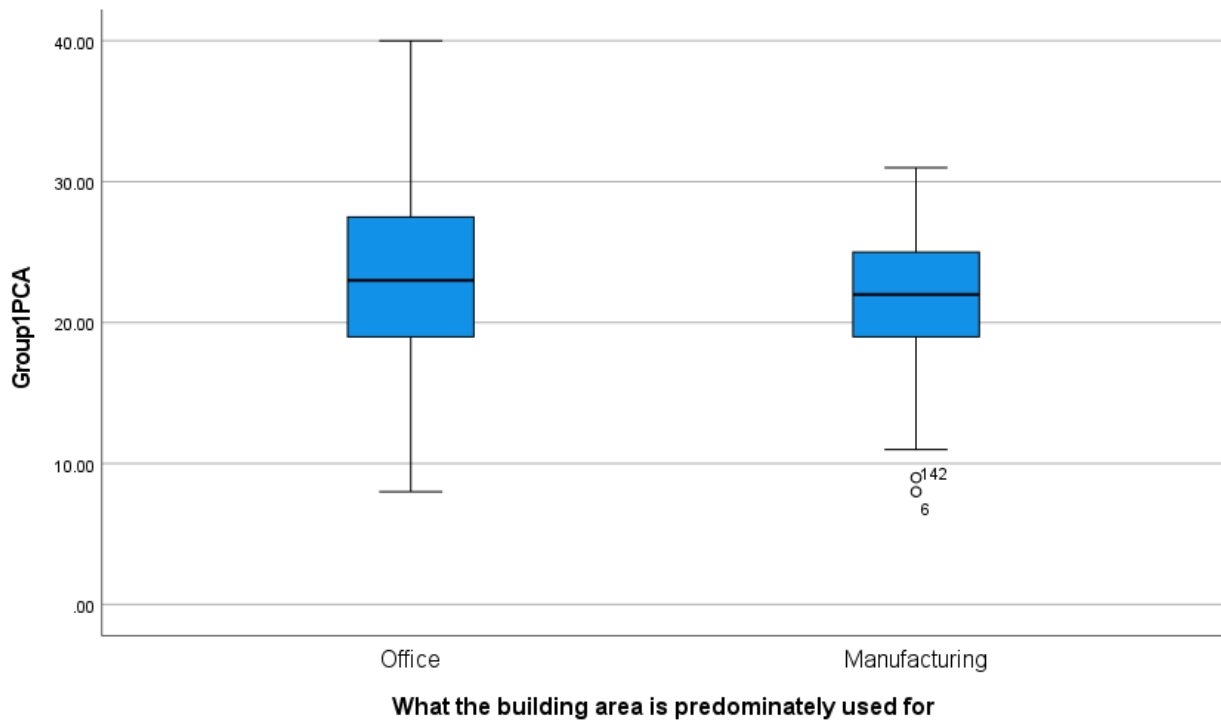

## T-Test

| Group Statistics                                 |               |     |         |                |                 |
|--------------------------------------------------|---------------|-----|---------|----------------|-----------------|
| What the building area is predominately used for |               | N   | Mean    | Std. Deviation | Std. Error Mean |
| Group1PCA                                        | Office        | 120 | 23.3333 | 6.16351        | .56265          |
|                                                  | Manufacturing | 136 | 21.6838 | 4.59420        | .39395          |

| Independent Samples Test |                             |                                         |      |                              |         |             |             |                 |                       |                                           |         |
|--------------------------|-----------------------------|-----------------------------------------|------|------------------------------|---------|-------------|-------------|-----------------|-----------------------|-------------------------------------------|---------|
|                          |                             | Levene's Test for Equality of Variances |      | t-test for Equality of Means |         |             |             |                 |                       | 95% Confidence Interval of the Difference |         |
|                          |                             | F                                       | Sig. | t                            | df      | One-Sided p | Two-Sided p | Mean Difference | Std. Error Difference | Lower                                     | Upper   |
| Group1PCA                | Equal variances assumed     | 9.390                                   | .002 | 2.445                        | 254     | .008        | .015        | 1.64951         | .67465                | .32089                                    | 2.97813 |
|                          | Equal variances not assumed |                                         |      | 2.402                        | 218.077 | .009        | .017        | 1.64951         | .68685                | .29579                                    | 3.00323 |

| Independent Samples Effect Sizes |           |                           |                |                         |       |
|----------------------------------|-----------|---------------------------|----------------|-------------------------|-------|
|                                  |           | Standardizer <sup>a</sup> | Point Estimate | 95% Confidence Interval |       |
| Group1PCA                        | Cohen's d |                           |                | Lower                   | Upper |
|                                  |           | 5.38665                   | .306           | .059                    | .553  |

|                    |         |      |      |      |
|--------------------|---------|------|------|------|
| Hedges' correction | 5.40262 | .305 | .059 | .551 |
| Glass's delta      | 4.59420 | .359 | .109 | .608 |

a. The denominator used in estimating the effect sizes.

Cohen's d uses the pooled standard deviation.

Hedges' correction uses the pooled standard deviation, plus a correction factor.

Glass's delta uses the sample standard deviation of the control group.

\*\*\*\*\*Remove 142 and 6 from the dataset, as these have been identified as outliers, and re-run the descriptives and t-tes

What the building area is predominately used for

#### Case Processing Summary

| What the building area is<br>predominately used for |               | Valid |         | Cases<br>Missing |         | Total |         |
|-----------------------------------------------------|---------------|-------|---------|------------------|---------|-------|---------|
|                                                     |               | N     | Percent | N                | Percent | N     | Percent |
| Group1PCA                                           | Office        | 120   | 100.0%  | 0                | 0.0%    | 120   | 100.0%  |
|                                                     | Manufacturing | 134   | 100.0%  | 0                | 0.0%    | 134   | 100.0%  |

#### Descriptives

| What the building area is predominately used for |               | Statistic                        | Std. Error |
|--------------------------------------------------|---------------|----------------------------------|------------|
| Group1PCA                                        | Office        | Mean                             | .56265     |
|                                                  |               | 95% Confidence Interval for Mean |            |
|                                                  |               | Lower Bound                      | 22.2192    |
|                                                  |               | Upper Bound                      | 24.4474    |
|                                                  |               | 5% Trimmed Mean                  | 23.2500    |
|                                                  |               | Median                           | 23.0000    |
|                                                  |               | Variance                         | 37.989     |
|                                                  |               | Std. Deviation                   | 6.16351    |
|                                                  |               | Minimum                          | 8.00       |
|                                                  |               | Maximum                          | 40.00      |
|                                                  |               | Range                            | 32.00      |
|                                                  |               | Interquartile Range              | 8.75       |
|                                                  |               | Skewness                         | .199       |
|                                                  |               | Kurtosis                         | .111       |
|                                                  | Manufacturing | Mean                             | .37424     |
|                                                  |               | 95% Confidence Interval for Mean |            |
|                                                  |               | Lower Bound                      | 21.1404    |
|                                                  |               | Upper Bound                      | 22.6208    |
|                                                  |               | 5% Trimmed Mean                  | 21.8532    |
|                                                  |               | Median                           | 22.0000    |
|                                                  |               | Variance                         | 18.768     |
|                                                  |               | Std. Deviation                   | 4.33216    |
|                                                  |               | Minimum                          | 11.00      |
|                                                  |               | Maximum                          | 31.00      |
|                                                  |               | Range                            | 20.00      |
|                                                  |               | Interquartile Range              | 6.00       |
|                                                  |               | Skewness                         | .183       |

|  |          |        |      |
|--|----------|--------|------|
|  | Kurtosis |        |      |
|  |          | - .362 | .416 |

| Tests of Normality                               |               |                                 |     |                   |              |     |      |
|--------------------------------------------------|---------------|---------------------------------|-----|-------------------|--------------|-----|------|
| What the building area is predominately used for |               | Kolmogorov-Smirnov <sup>a</sup> |     |                   | Shapiro-Wilk |     |      |
|                                                  |               | Statistic                       | df  | Sig.              | Statistic    | df  | Sig. |
| Group1PCA                                        | Office        | .067                            | 120 | .200 <sup>*</sup> | .988         | 120 | .379 |
|                                                  | Manufacturing | .101                            | 134 | .002              | .981         | 134 | .058 |

\*. This is a lower bound of the true significance.

a. Lilliefors Significance Correction

### Histograms

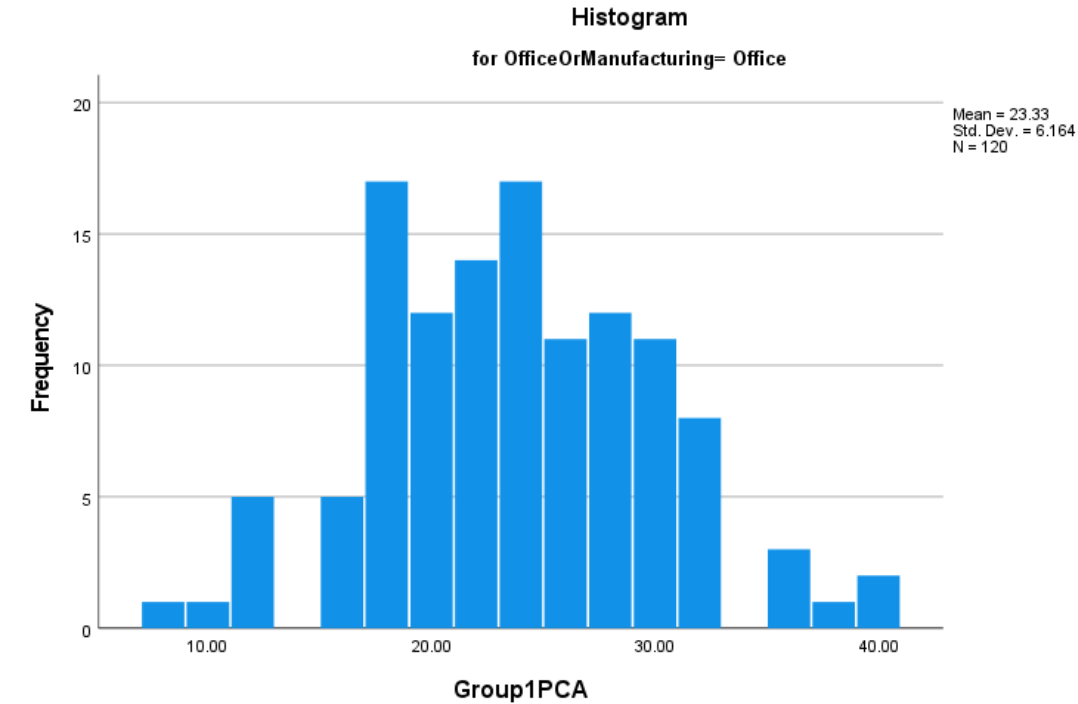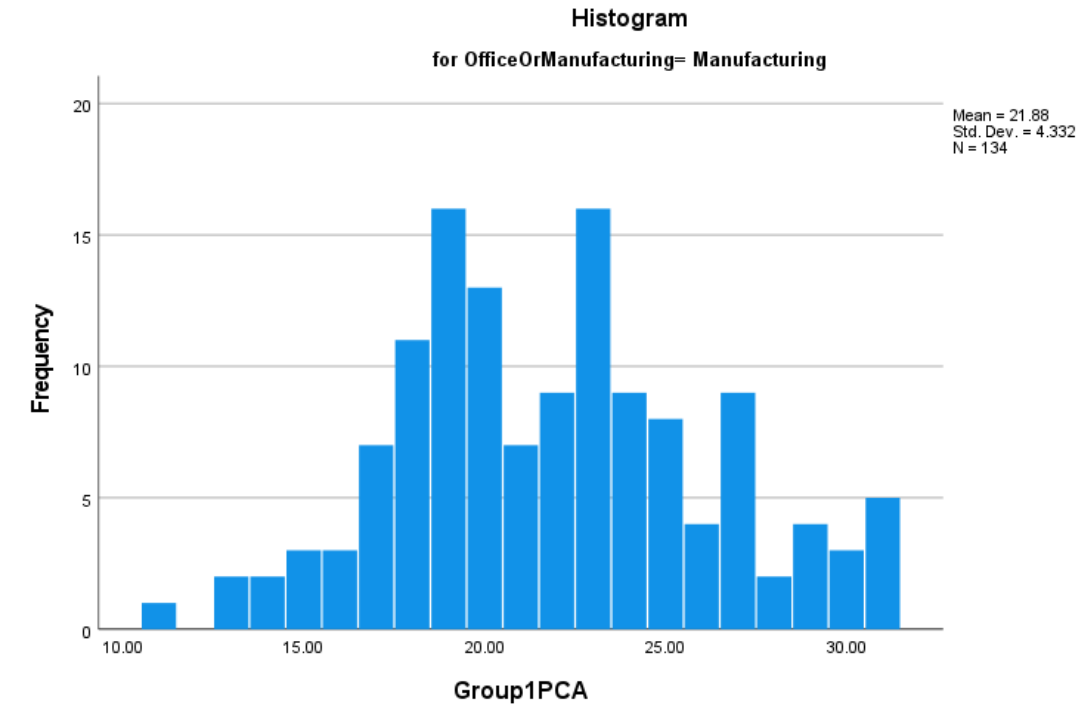

### Normal Q-Q Plots

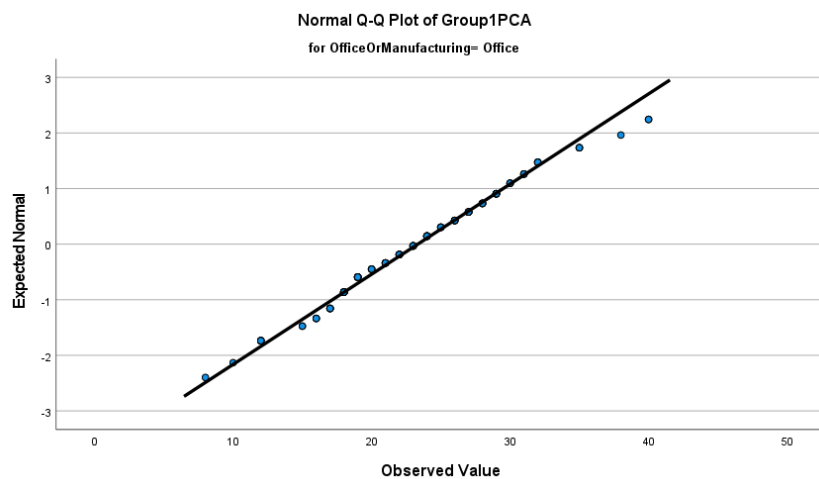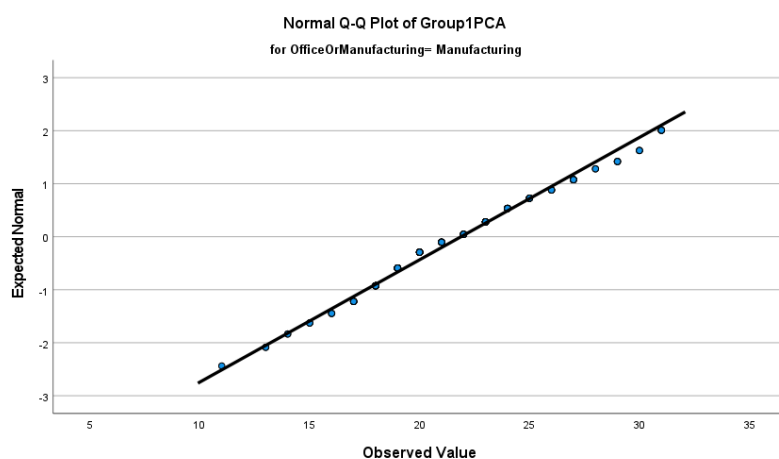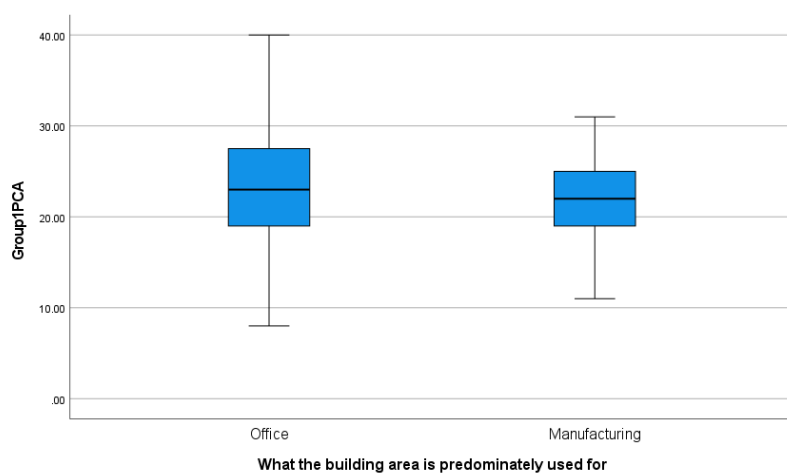

## T-Test

| Group Statistics                                 |               |     |         |                |                 |
|--------------------------------------------------|---------------|-----|---------|----------------|-----------------|
| What the building area is predominately used for |               | N   | Mean    | Std. Deviation | Std. Error Mean |
| Group1PCA                                        | Office        | 120 | 23.3333 | 6.16351        | .56265          |
|                                                  | Manufacturing | 134 | 21.8806 | 4.33216        | .37424          |

## Independent Samples Test

Levene's Test for  
Equality of Variances

t-test for Equality of Means

|           |                             |        |       |       |         | Significance |             |                 |                       | 95% Confidence Interval of the Difference |         |
|-----------|-----------------------------|--------|-------|-------|---------|--------------|-------------|-----------------|-----------------------|-------------------------------------------|---------|
|           |                             | F      | Sig.  | t     | df      | One-Sided p  | Two-Sided p | Mean Difference | Std. Error Difference | Lower                                     | Upper   |
| Group1PCA | Equal variances assumed     | 12.460 | <.001 | 2.191 | 252     | .015         | .029        | 1.45274         | .66320                | .14662                                    | 2.75885 |
|           | Equal variances not assumed |        |       | 2.150 | 210.689 | .016         | .033        | 1.45274         | .67574                | .12065                                    | 2.78482 |

#### Independent Samples Effect Sizes

|           |                    |                           | 95% Confidence Interval |       |       |
|-----------|--------------------|---------------------------|-------------------------|-------|-------|
|           |                    | Standardizer <sup>a</sup> | Point Estimate          | Lower | Upper |
| Group1PCA | Cohen's d          | 5.27677                   | .275                    | .028  | .523  |
|           | Hedges' correction | 5.29254                   | .274                    | .027  | .521  |
|           | Glass's delta      | 4.33216                   | .335                    | .085  | .584  |

a. The denominator used in estimating the effect sizes.

Cohen's d uses the pooled standard deviation.

Hedges' correction uses the pooled standard deviation, plus a correction factor.

Glass's delta uses the sample standard deviation of the control group.

#### No further significant outliers found

**Shapiro-wilk test of normality is no longer significant (results are greater than 0.05)**

Proceed with reporting independent t-test results

#### GROUP 2

RUN DESCRIPTIVE ANALYSIS AND T-TEST ON ALL RESULTS EXAMINE VARIABLES=Group2PCA BY OfficeOrManufacturing /PLOT BOXPLOT HISTOGRAM NPLOT /COMPARE GROUPS /STATISTICS DESCRIPTIVES /CINTERVAL 95 /MISSING LISTWISE /NOTOTAL. T-TEST GROUPS=OfficeOrManufacturing(1 2) /MISSING=ANALYSIS /VARIABLES=Group2PCA /CRITERIA=CI(.95). RUN DESCRIPTIVE ANALYSIS AND T-TEST EXAMINE VARIABLES=Group1PCA BY OfficeOrManufacturing /PLOT BOXPLOT HISTOGRAM NPLOT /COMPARE GROUPS /STATISTICS DESCRIPTIVES /CINTERVAL 95 /MISSING LISTWISE /NOTOTAL. T-TEST GROUPS=OfficeOrManufacturing(1 2) /MISSING=ANALYSIS /VARIABLES=Group1PCA /CRITERIA=CI(.95).

#### Explore

**What the building area is predominately used for**

#### Case Processing Summary

|                                                  |               | Valid |         | Cases Missing |         | Total |         |
|--------------------------------------------------|---------------|-------|---------|---------------|---------|-------|---------|
| What the building area is predominately used for |               | N     | Percent | N             | Percent | N     | Percent |
| Group2PCA                                        | Office        | 120   | 100.0%  | 0             | 0.0%    | 120   | 100.0%  |
|                                                  | Manufacturing | 136   | 100.0%  | 0             | 0.0%    | 136   | 100.0%  |

#### Descriptives

| What the building area is predominately used for |        | Statistic                        | Std. Error |
|--------------------------------------------------|--------|----------------------------------|------------|
| Group2PCA                                        | Office | Mean                             | 13.5917    |
|                                                  |        | 95% Confidence Interval for Mean | .23890     |
|                                                  |        | Lower Bound                      | 13.1186    |
|                                                  |        | Upper Bound                      | 14.0647    |
|                                                  |        | 5% Trimmed Mean                  | 13.5833    |

|  |               |                                  |             |         |
|--|---------------|----------------------------------|-------------|---------|
|  |               | Median                           | 14.0000     |         |
|  |               | Variance                         | 6.849       |         |
|  |               | Std. Deviation                   | 2.61700     |         |
|  |               | Minimum                          | 6.00        |         |
|  |               | Maximum                          | 20.00       |         |
|  |               | Range                            | 14.00       |         |
|  |               | Interquartile Range              | 3.00        |         |
|  |               | Skewness                         | .059        | .221    |
|  |               | Kurtosis                         | .480        | .438    |
|  | Manufacturing | Mean                             | 12.3529     | .21555  |
|  |               | 95% Confidence Interval for Mean | Lower Bound | 11.9266 |
|  |               |                                  | Upper Bound | 12.7792 |
|  |               | 5% Trimmed Mean                  | 12.3676     |         |
|  |               | Median                           | 13.0000     |         |
|  |               | Variance                         | 6.319       |         |
|  |               | Std. Deviation                   | 2.51375     |         |
|  |               | Minimum                          | 7.00        |         |
|  |               | Maximum                          | 19.00       |         |
|  |               | Range                            | 12.00       |         |
|  |               | Interquartile Range              | 4.00        |         |
|  |               | Skewness                         | -.101       | .208    |
|  |               | Kurtosis                         | -.242       | .413    |

| Tests of Normality                               |               |                                 |     |       |              |     |      |
|--------------------------------------------------|---------------|---------------------------------|-----|-------|--------------|-----|------|
| What the building area is predominately used for |               | Kolmogorov-Smirnov <sup>a</sup> |     |       | Shapiro-Wilk |     |      |
|                                                  |               | Statistic                       | df  | Sig.  | Statistic    | df  | Sig. |
| Group2PCA                                        | Office        | .105                            | 120 | .003  | .975         | 120 | .027 |
|                                                  | Manufacturing | .146                            | 136 | <.001 | .967         | 136 | .002 |

a. Lilliefors Significance Correction  
**Histograms**

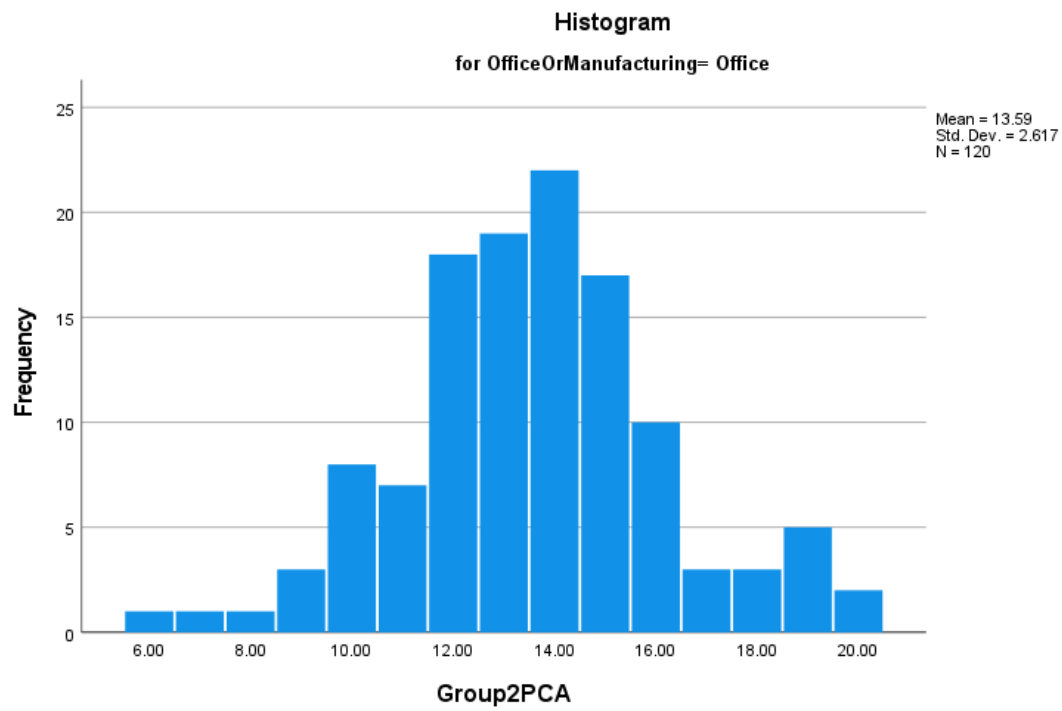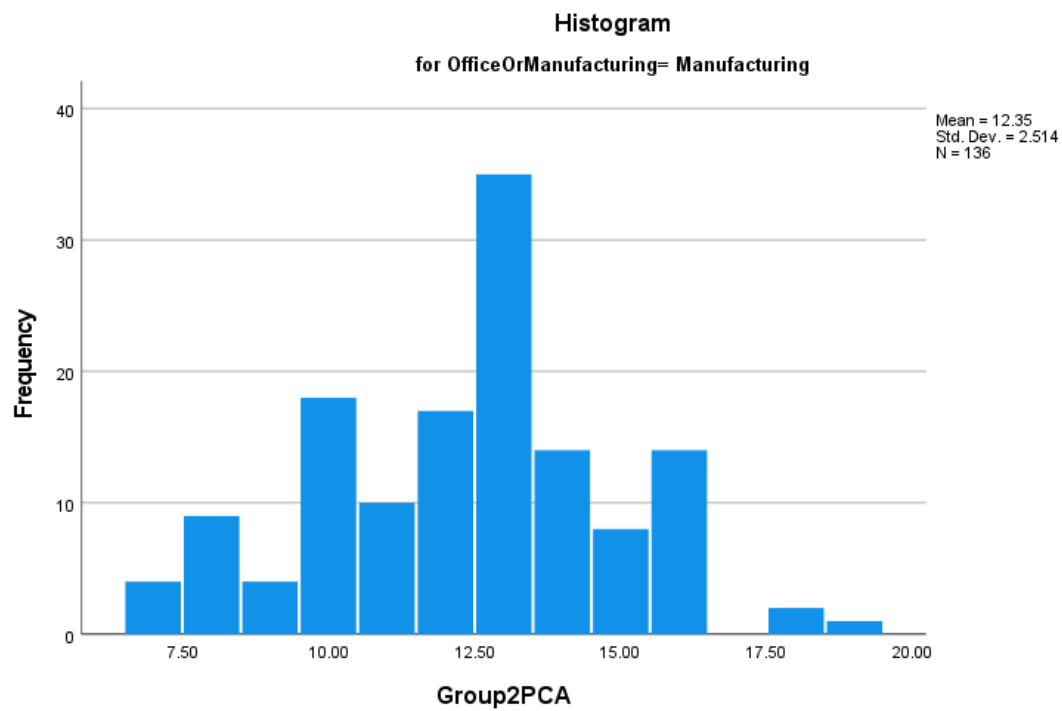

Normal Q-Q Plots

Normal Q-Q Plot of Group2PCA  
for OfficeOrManufacturing= Office

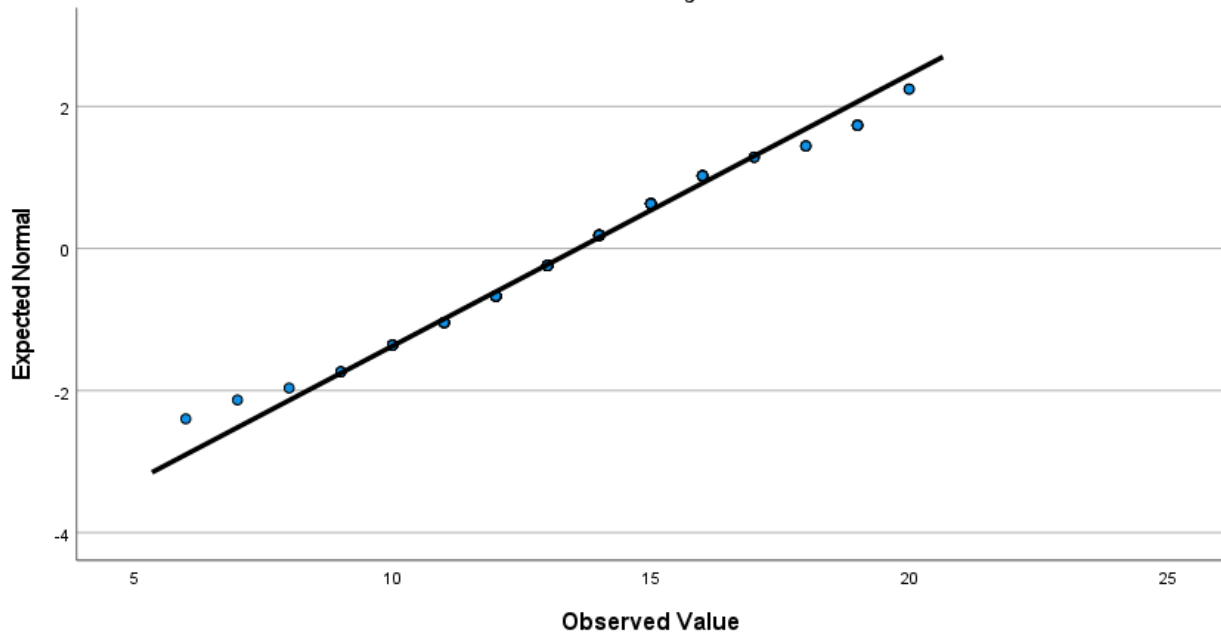

Normal Q-Q Plot of Group2PCA  
for OfficeOrManufacturing= Manufacturing

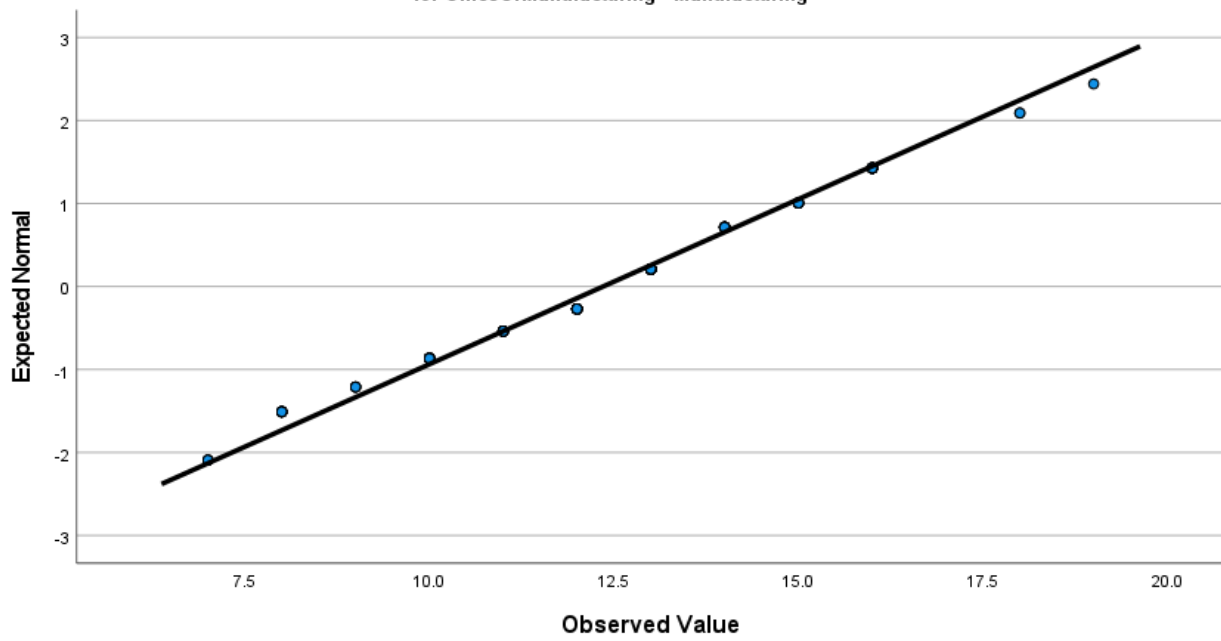



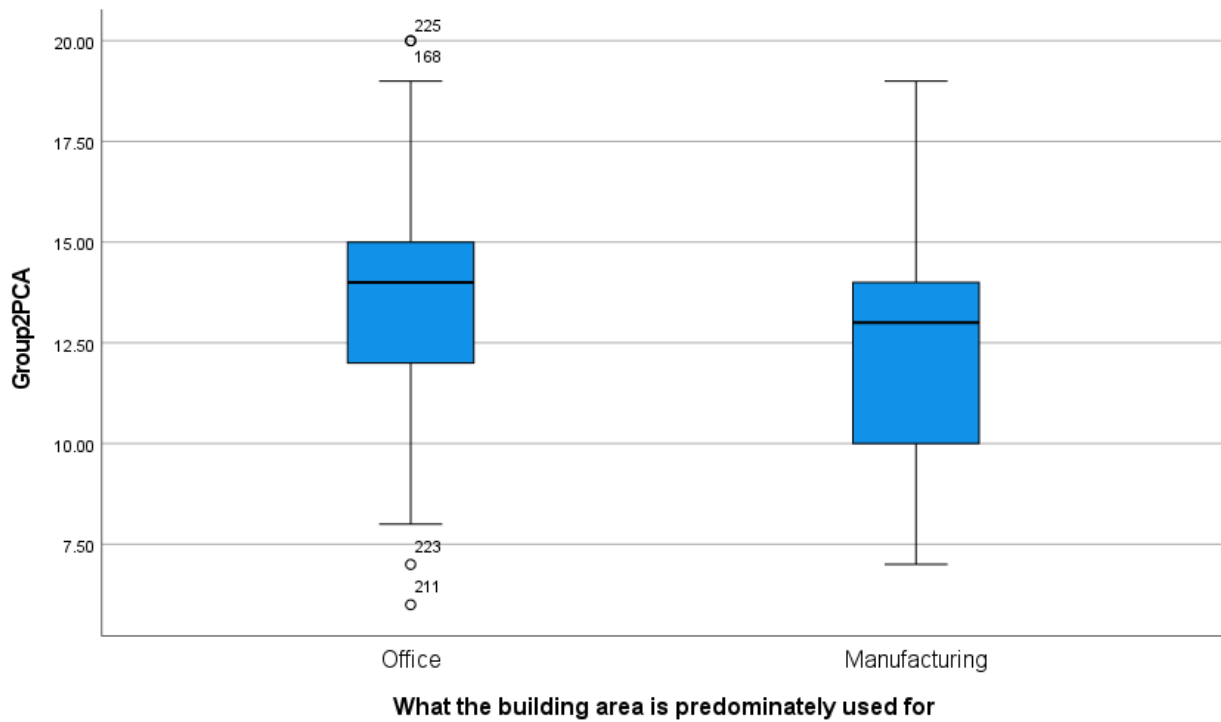

### T-Test

| Group Statistics                                 |               |     |         |                |                 |
|--------------------------------------------------|---------------|-----|---------|----------------|-----------------|
| What the building area is predominately used for |               | N   | Mean    | Std. Deviation | Std. Error Mean |
| Group2PCA                                        | Office        | 120 | 13.5917 | 2.61700        | .23890          |
|                                                  | Manufacturing | 136 | 12.3529 | 2.51375        | .21555          |

| Independent Samples Test |                             |                                         |      |                              |         |                          |                          |                 |                       |                                           |         |
|--------------------------|-----------------------------|-----------------------------------------|------|------------------------------|---------|--------------------------|--------------------------|-----------------|-----------------------|-------------------------------------------|---------|
|                          |                             | Levene's Test for Equality of Variances |      | t-test for Equality of Means |         |                          |                          |                 |                       | 95% Confidence Interval of the Difference |         |
|                          |                             | F                                       | Sig. | t                            | df      | Significance One-Sided p | Significance Two-Sided p | Mean Difference | Std. Error Difference | Lower                                     | Upper   |
| Group2PCA                | Equal variances assumed     | .001                                    | .972 | 3.859                        | 254     | <.001                    | <.001                    | 1.23873         | .32096                | .60665                                    | 1.87080 |
|                          | Equal variances not assumed |                                         |      | 3.850                        | 247.205 | <.001                    | <.001                    | 1.23873         | .32177                | .60497                                    | 1.87248 |

### Independent Samples Effect Sizes

| Standardizer <sup>a</sup> | Point Estimate | 95% Confidence Interval |       |
|---------------------------|----------------|-------------------------|-------|
|                           |                | Lower                   | Upper |

|           |                    |         |      |      |      |
|-----------|--------------------|---------|------|------|------|
| Group2PCA | Cohen's d          | 2.56264 | .483 | .234 | .732 |
|           | Hedges' correction | 2.57024 | .482 | .233 | .730 |
|           | Glass's delta      | 2.51375 | .493 | .240 | .744 |

a. The denominator used in estimating the effect sizes.

Cohen's d uses the pooled standard deviation.

Hedges' correction uses the pooled standard deviation, plus a correction factor.

Glass's delta uses the sample standard deviation of the control group.

**several outliers identified - 225, 168, 223, 211 Remove these and re-run test**

EXAMINE VARIABLES=Group2PCA BY OfficeOrManufacturing /PLOT BOXPLOT HISTOGRAM NPLOT /COMPARE GROUPS /STATISTICS DESCRIPTIVES /CINTERVAL 95 /MISSING LISTWISE /NOTOTAL. T-TEST GROUPS=OfficeOrManufacturing(1 2) /MISSING=ANALYSIS /VARIABLES=Group2PCA /CRITERIA=CI(.95).

## Explore

What the building area is predominately used for

### Case Processing Summary

| What the building area is predominately used for |               | Valid |         | Cases Missing |         | Total |         |
|--------------------------------------------------|---------------|-------|---------|---------------|---------|-------|---------|
|                                                  |               | N     | Percent | N             | Percent | N     | Percent |
| Group2PCA                                        | Office        | 116   | 100.0%  | 0             | 0.0%    | 116   | 100.0%  |
|                                                  | Manufacturing | 136   | 100.0%  | 0             | 0.0%    | 136   | 100.0%  |

### Descriptives

| What the building area is predominately used for |               | Statistic                        |             | Std. Error |
|--------------------------------------------------|---------------|----------------------------------|-------------|------------|
| Group2PCA                                        | Office        | Mean                             | 13.6034     | .21762     |
|                                                  |               | 95% Confidence Interval for Mean | Lower Bound | 13.1724    |
|                                                  |               |                                  | Upper Bound | 14.0345    |
|                                                  |               | 5% Trimmed Mean                  | 13.5594     |            |
|                                                  |               | Median                           | 14.0000     |            |
|                                                  |               | Variance                         | 5.494       |            |
|                                                  |               | Std. Deviation                   | 2.34383     |            |
|                                                  |               | Minimum                          | 8.00        |            |
|                                                  |               | Maximum                          | 19.00       |            |
|                                                  |               | Range                            | 11.00       |            |
|                                                  |               | Interquartile Range              | 3.00        |            |
|                                                  |               | Skewness                         | .205        | .225       |
|                                                  |               | Kurtosis                         | .041        | .446       |
|                                                  | Manufacturing | Mean                             | 12.3529     | .21555     |
|                                                  |               | 95% Confidence Interval for Mean | Lower Bound | 11.9266    |
|                                                  |               |                                  | Upper Bound | 12.7792    |
|                                                  |               | 5% Trimmed Mean                  | 12.3676     |            |
|                                                  |               | Median                           | 13.0000     |            |
|                                                  |               | Variance                         | 6.319       |            |
|                                                  |               | Std. Deviation                   | 2.51375     |            |
|                                                  |               | Minimum                          | 7.00        |            |
|                                                  |               | Maximum                          | 19.00       |            |
|                                                  |               | Range                            | 12.00       |            |

|                     |  |       |      |
|---------------------|--|-------|------|
| Interquartile Range |  | 4.00  |      |
| Skewness            |  | -.101 | .208 |
| Kurtosis            |  | -.242 | .413 |

|                                                  |               | Tests of Normality              |     |       |              |     |      |
|--------------------------------------------------|---------------|---------------------------------|-----|-------|--------------|-----|------|
| What the building area is predominately used for |               | Kolmogorov-Smirnov <sup>a</sup> |     |       | Shapiro-Wilk |     |      |
|                                                  |               | Statistic                       | df  | Sig.  | Statistic    | df  | Sig. |
| Group2PCA                                        | Office        | .105                            | 116 | .003  | .972         | 116 | .016 |
|                                                  | Manufacturing | .146                            | 136 | <.001 | .967         | 136 | .002 |

a. Lilliefors Significance Correction

Histograms

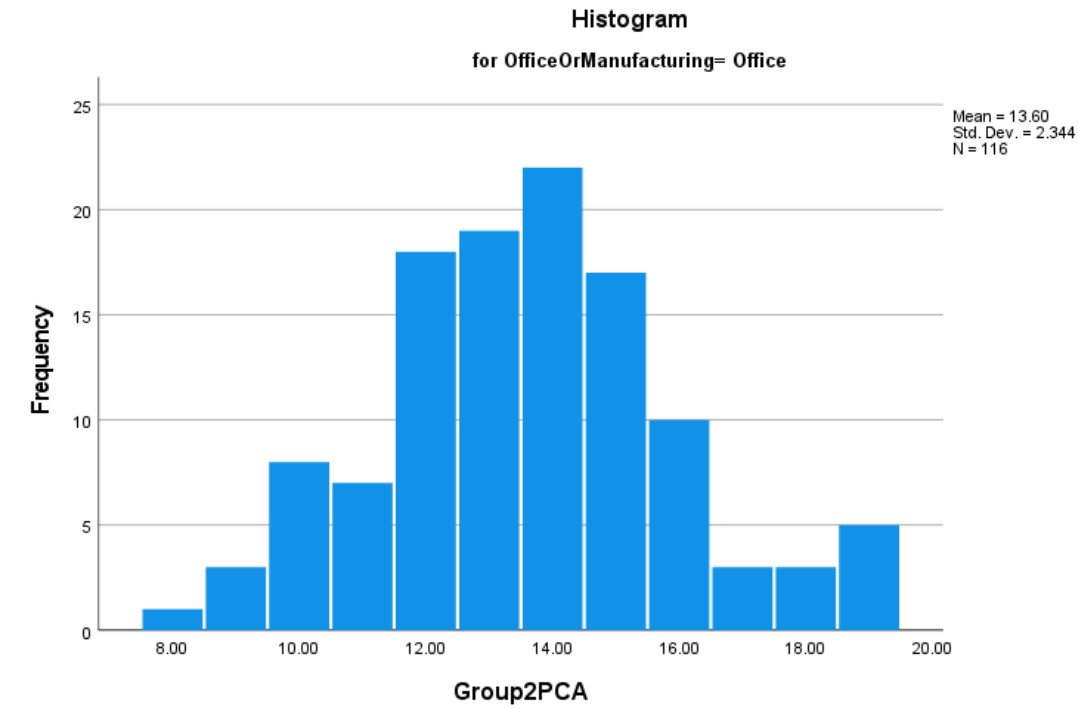

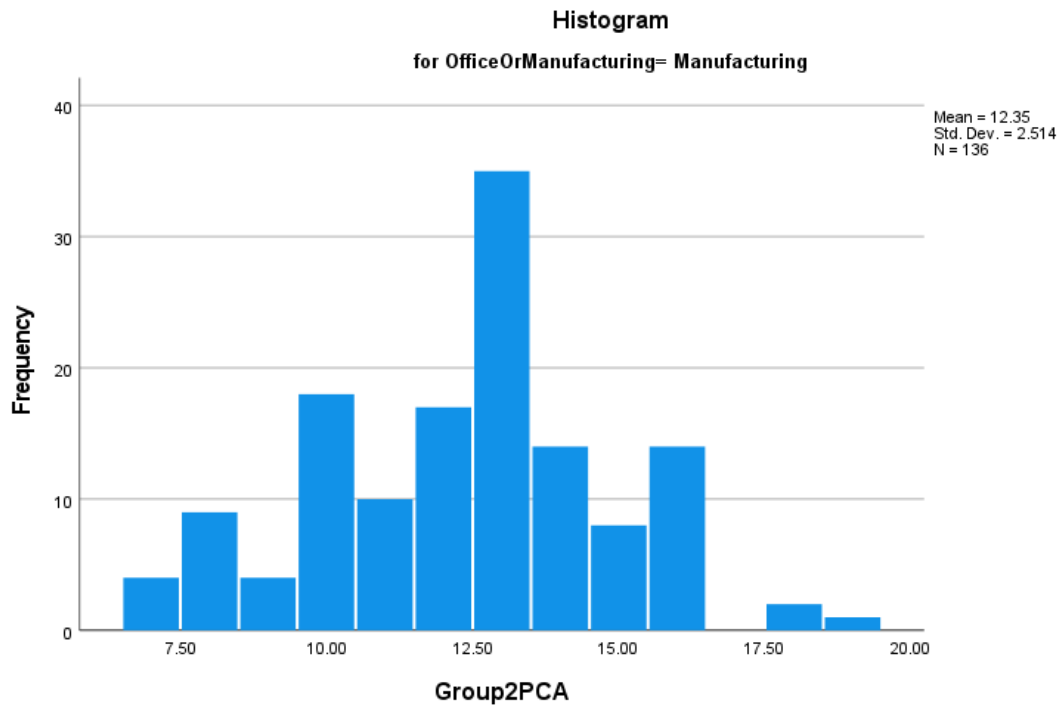

#### Normal Q-Q Plots

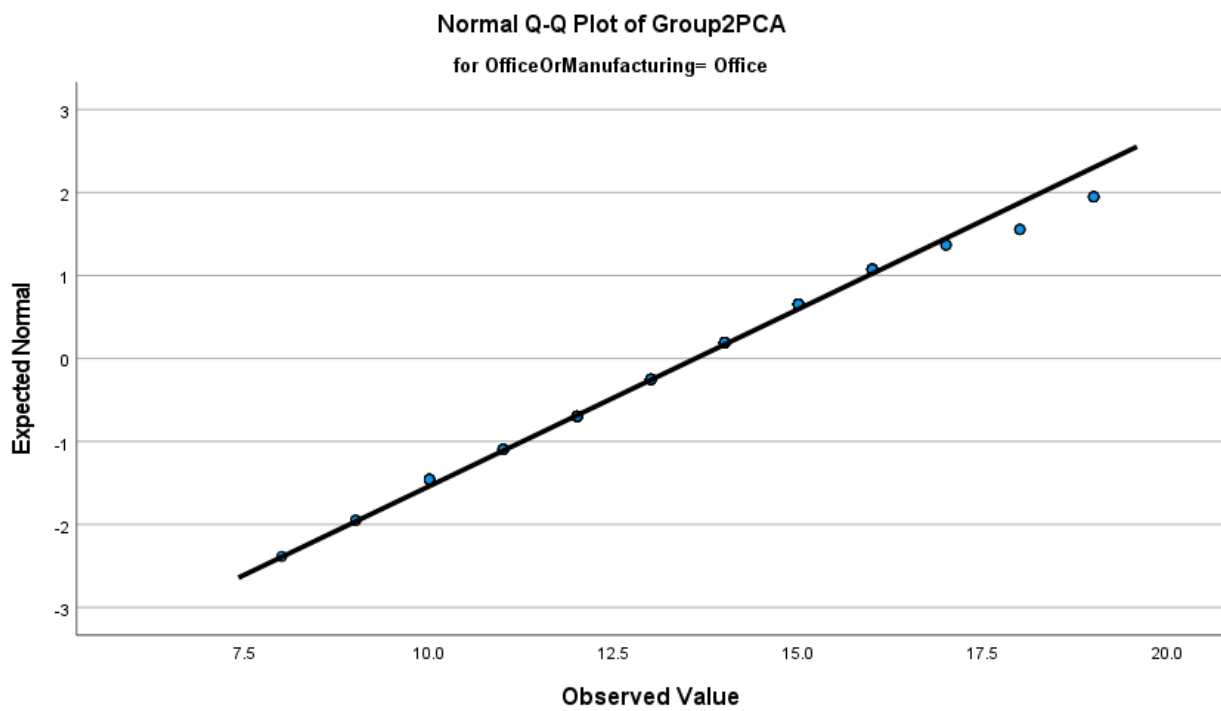

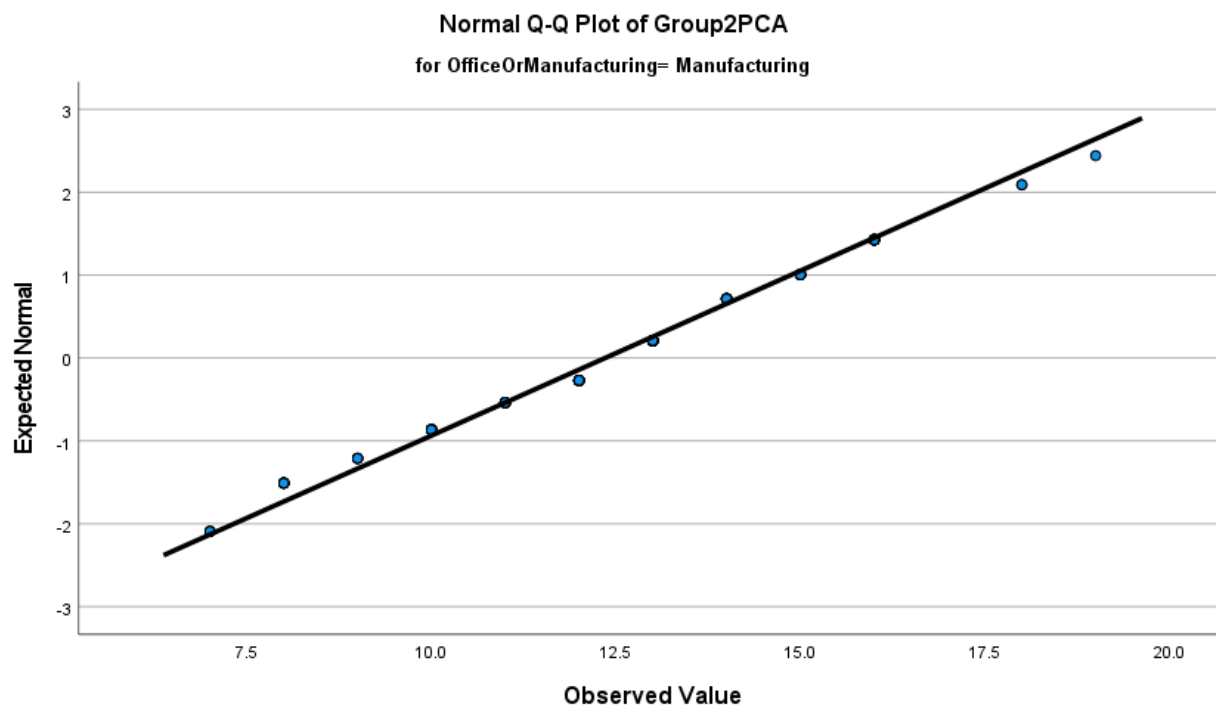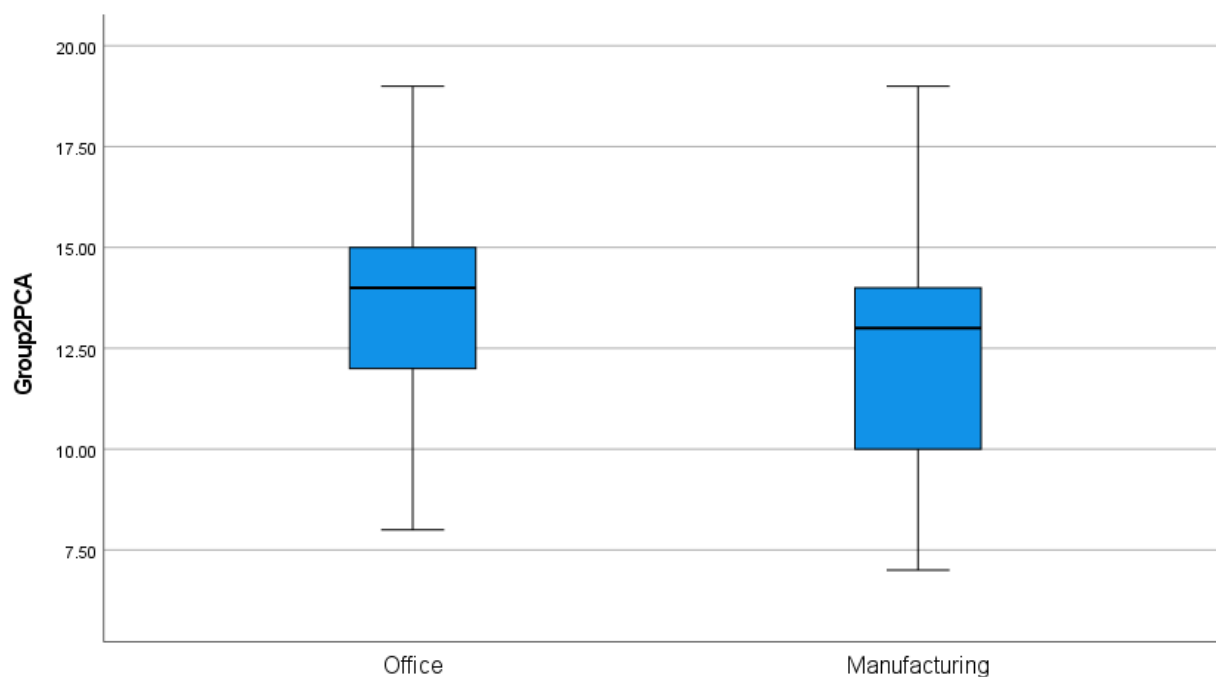

**What the building area is predominately used for**

| Group Statistics                                 |               |     |         |                |                 |
|--------------------------------------------------|---------------|-----|---------|----------------|-----------------|
| What the building area is predominately used for |               | N   | Mean    | Std. Deviation | Std. Error Mean |
| Group2PCA                                        | Office        | 116 | 13.6034 | 2.34383        | .21762          |
|                                                  | Manufacturing | 136 | 12.3529 | 2.51375        | .21555          |

**Independent Samples Test**

Levene's Test for  
Equality of Variances

t-test for Equality of Means

|           |                             |      |      |       |         | Significance |             |                 |                       | 95% Confidence Interval of the Difference |         |
|-----------|-----------------------------|------|------|-------|---------|--------------|-------------|-----------------|-----------------------|-------------------------------------------|---------|
|           |                             | F    | Sig. | t     | df      | One-Sided p  | Two-Sided p | Mean Difference | Std. Error Difference | Lower                                     | Upper   |
| Group2PCA | Equal variances assumed     | .703 | .402 | 4.060 | 250     | <.001        | <.001       | 1.25051         | .30801                | .64388                                    | 1.85714 |
|           | Equal variances not assumed |      |      | 4.083 | 247.999 | <.001        | <.001       | 1.25051         | .30630                | .64722                                    | 1.85379 |

#### Independent Samples Effect Sizes

|                           |                    |         |                | 95% Confidence Interval |       |
|---------------------------|--------------------|---------|----------------|-------------------------|-------|
| Standardizer <sup>a</sup> |                    |         | Point Estimate | Lower                   | Upper |
| Group2PCA                 | Cohen's d          | 2.43706 | .513           | .261                    | .764  |
|                           | Hedges' correction | 2.44440 | .512           | .260                    | .762  |
|                           | Glass's delta      | 2.51375 | .497           | .242                    | .751  |

a. The denominator used in estimating the effect sizes.

Cohen's d uses the pooled standard deviation.

Hedges' correction uses the pooled standard deviation, plus a correction factor.

Glass's delta uses the sample standard deviation of the control group.

**There are no longer any outliers in the dataset.**

**The Shapiro-Wilk test is significant for both groups, which highlights that the data is not normally distributed. This is confirmed by the box and whisker plots and Q-Q plot**

**Inappropriate to conduct independent t-test on this, pursue alternative such as mann-whitney test**

#### Group 3

**Conduct descriptives and t-test as above**

**What the building area is predominately used for**

#### Case Processing Summary

|                                                  |               | Valid |         | Missing |         | Total |         |
|--------------------------------------------------|---------------|-------|---------|---------|---------|-------|---------|
| What the building area is predominately used for |               | N     | Percent | N       | Percent | N     | Percent |
| Group3PCA                                        | Office        | 120   | 100.0%  | 0       | 0.0%    | 120   | 100.0%  |
|                                                  | Manufacturing | 136   | 100.0%  | 0       | 0.0%    | 136   | 100.0%  |

#### Descriptives

| What the building area is predominately used for |        | Statistic                        | Std. Error |
|--------------------------------------------------|--------|----------------------------------|------------|
| Group3PCA                                        | Office | Mean                             | 20.8000    |
|                                                  |        | 95% Confidence Interval for Mean | .25066     |
|                                                  |        | Lower Bound                      | 20.3037    |
|                                                  |        | Upper Bound                      | 21.2963    |
|                                                  |        | 5% Trimmed Mean                  | 20.8981    |
|                                                  |        | Median                           | 20.0000    |
|                                                  |        | Variance                         | 7.539      |
|                                                  |        | Std. Deviation                   | 2.74581    |
|                                                  |        | Minimum                          | 11.00      |
|                                                  |        | Maximum                          | 25.00      |
|                                                  |        | Range                            | 14.00      |
|                                                  |        | Interquartile Range              | 4.00       |
|                                                  |        | Skewness                         | -.362      |
|                                                  |        |                                  | .221       |

|               |                                  |             |         |        |
|---------------|----------------------------------|-------------|---------|--------|
| Manufacturing | Kurtosis                         |             | .159    | .438   |
|               | Mean                             |             | 20.3015 | .21090 |
|               | 95% Confidence Interval for Mean | Lower Bound | 19.8844 |        |
|               |                                  | Upper Bound | 20.7186 |        |
|               | 5% Trimmed Mean                  |             | 20.3693 |        |
|               | Median                           |             | 20.0000 |        |
|               | Variance                         |             | 6.049   |        |
|               | Std. Deviation                   |             | 2.45951 |        |
|               | Minimum                          |             | 10.00   |        |
|               | Maximum                          |             | 25.00   |        |
|               | Range                            |             | 15.00   |        |
|               | Interquartile Range              |             | 3.00    |        |
|               | Skewness                         |             | -.476   | .208   |
|               | Kurtosis                         |             | 1.672   | .413   |

| Tests of Normality                               |               |                                 |     |       |              |     |       |
|--------------------------------------------------|---------------|---------------------------------|-----|-------|--------------|-----|-------|
| What the building area is predominately used for |               | Kolmogorov-Smirnov <sup>a</sup> |     |       | Shapiro-Wilk |     |       |
|                                                  |               | Statistic                       | df  | Sig.  | Statistic    | df  | Sig.  |
| Group3PCA                                        | Office        | .140                            | 120 | <.001 | .952         | 120 | <.001 |
|                                                  | Manufacturing | .144                            | 136 | <.001 | .949         | 136 | <.001 |

a. Lilliefors Significance Correction

Histograms

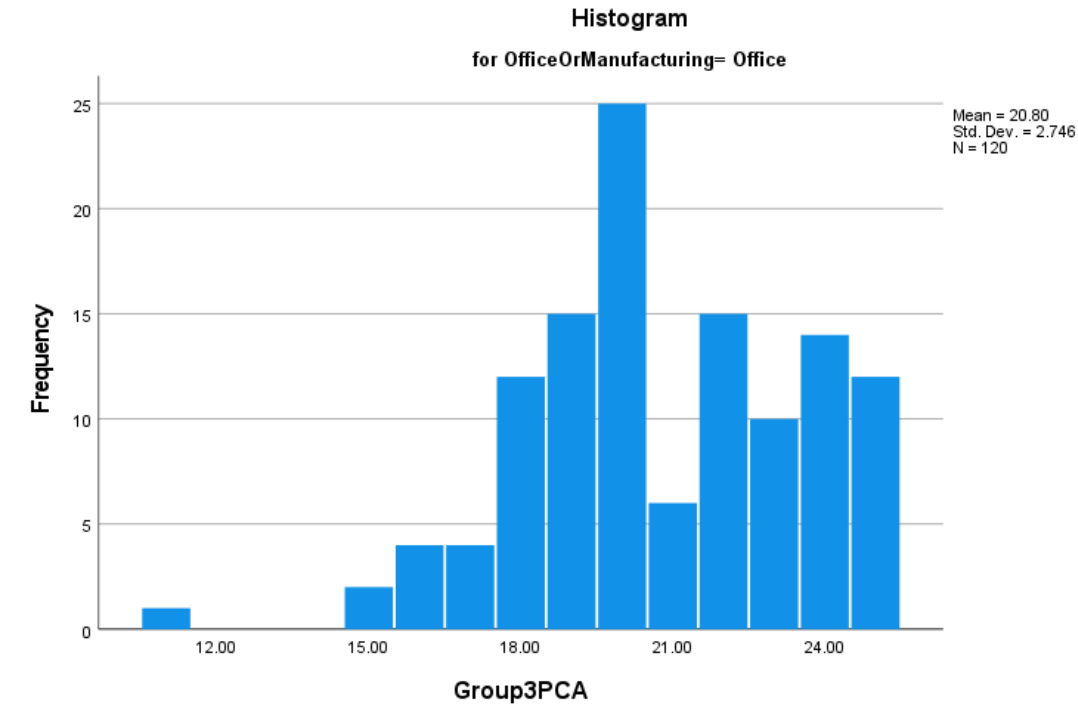

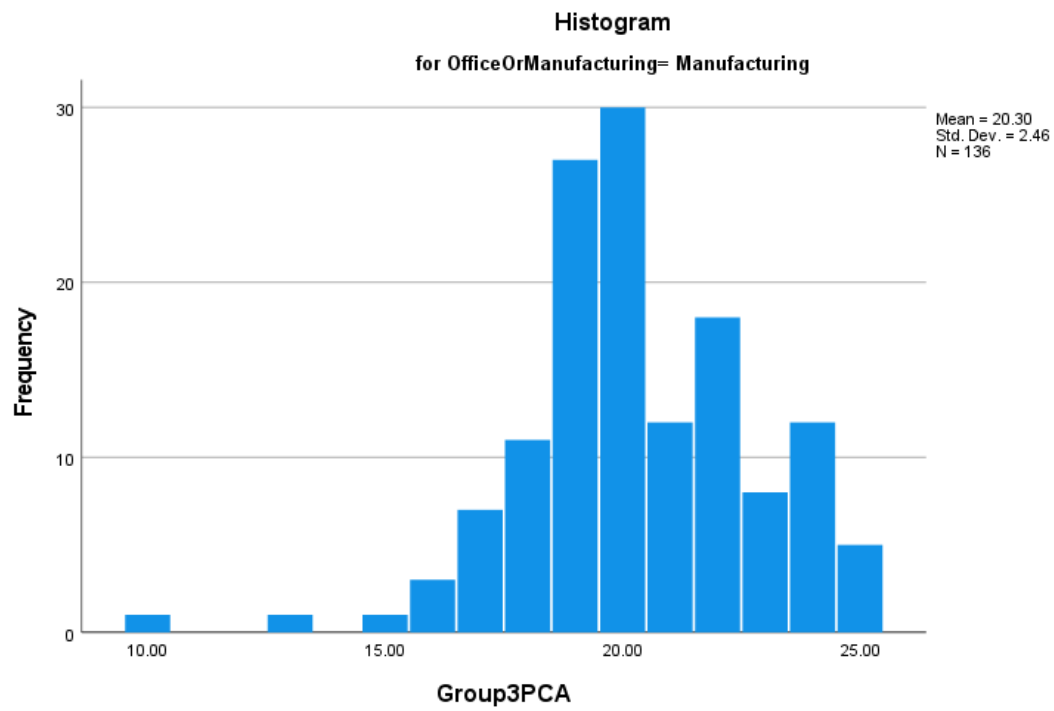

Normal Q-Q Plots

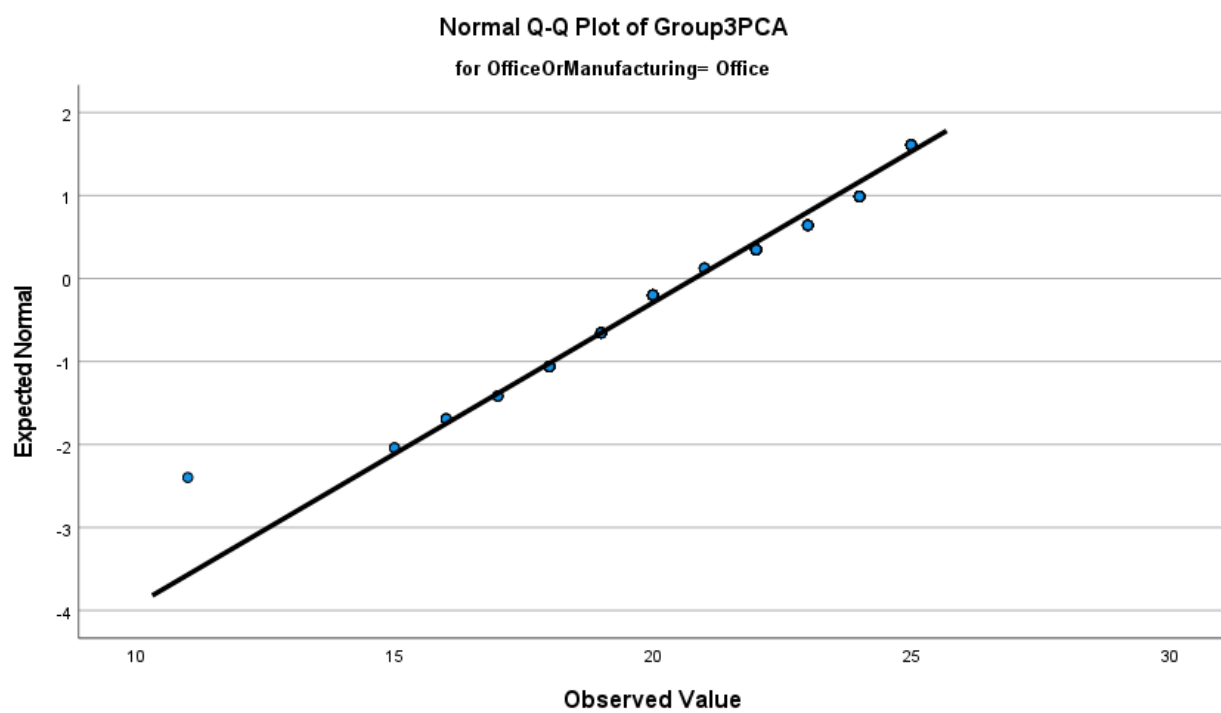



Normal Q-Q Plot of Group3PCA  
for OfficeOrManufacturing= Manufacturing

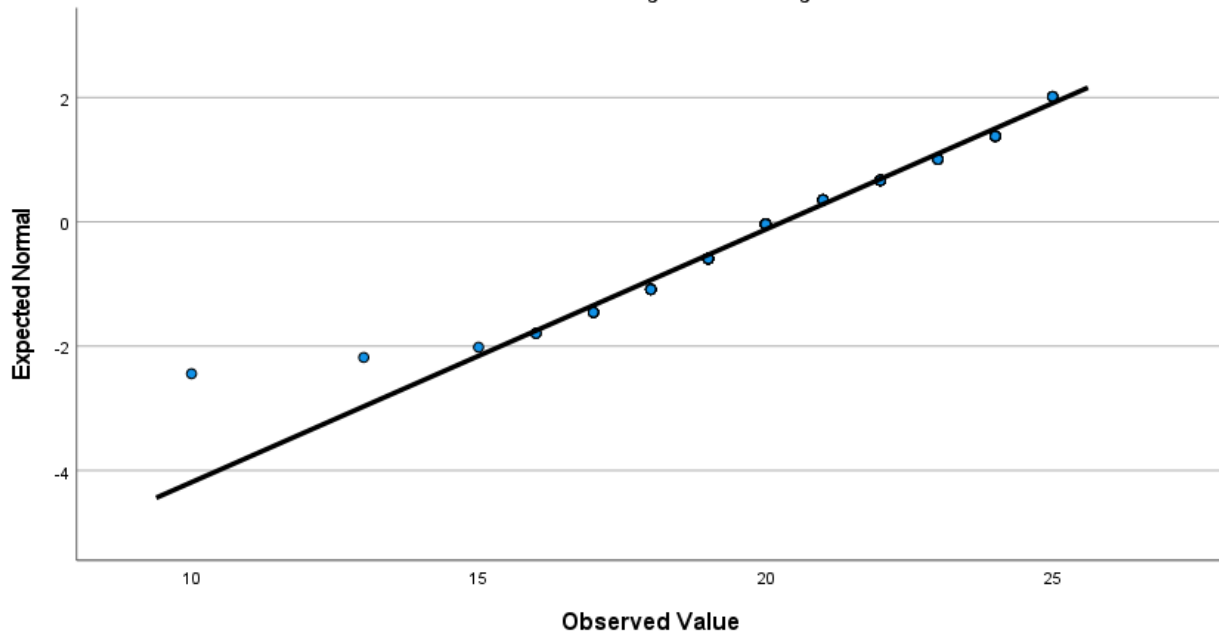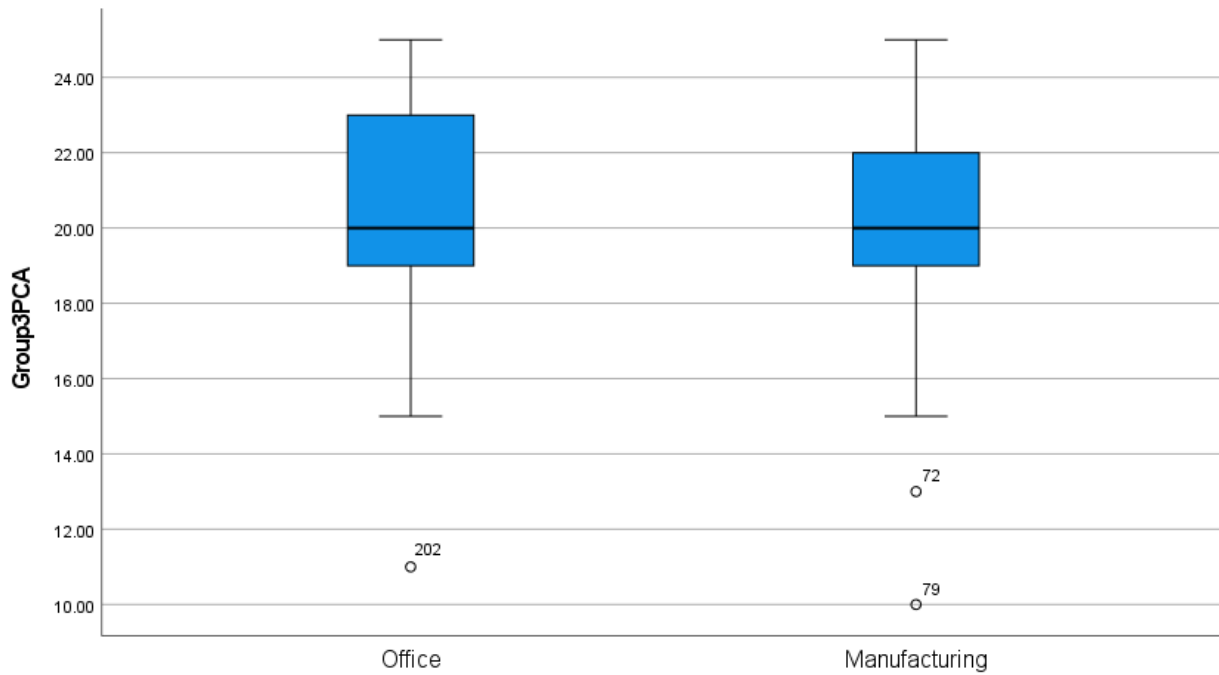

What the building area is predominately used for

| Group Statistics                                 |               |     |         |                |                 |
|--------------------------------------------------|---------------|-----|---------|----------------|-----------------|
| What the building area is predominately used for |               | N   | Mean    | Std. Deviation | Std. Error Mean |
| Group3PCA                                        | Office        | 120 | 20.8000 | 2.74581        | .25066          |
|                                                  | Manufacturing | 136 | 20.3015 | 2.45951        | .21090          |

Independent Samples Test

Levene's Test for  
Equality of Variances

t-test for Equality of Means

|           |                             |       |      |       |         | Significance |             |                 |                       | 95% Confidence Interval of the Difference |         |
|-----------|-----------------------------|-------|------|-------|---------|--------------|-------------|-----------------|-----------------------|-------------------------------------------|---------|
|           |                             | F     | Sig. | t     | df      | One-Sided p  | Two-Sided p | Mean Difference | Std. Error Difference | Lower                                     | Upper   |
| Group3PCA | Equal variances assumed     | 3.940 | .048 | 1.532 | 254     | .063         | .127        | .49853          | .32533                | -.14216                                   | 1.13922 |
|           | Equal variances not assumed |       |      | 1.522 | 240.765 | .065         | .129        | .49853          | .32758                | -.14676                                   | 1.14382 |

#### Independent Samples Effect Sizes

|           |                    |                           | 95% Confidence Interval |       |       |
|-----------|--------------------|---------------------------|-------------------------|-------|-------|
|           |                    | Standardizer <sup>a</sup> | Point Estimate          | Lower | Upper |
| Group3PCA | Cohen's d          | 2.59758                   | .192                    | -.054 | .438  |
|           | Hedges' correction | 2.60528                   | .191                    | -.054 | .436  |
|           | Glass's delta      | 2.45951                   | .203                    | -.044 | .449  |

a. The denominator used in estimating the effect sizes.

Cohen's d uses the pooled standard deviation.

Hedges' correction uses the pooled standard deviation, plus a correction factor.

Glass's delta uses the sample standard deviation of the control group.

**Analysis identifies the following outliers 72, 79 and 202**

**Remove these and re-run analysis**

**What the building area is predominately used for**

#### Case Processing Summary

|                                                  |               | Valid |         | Cases Missing |         | Total |         |
|--------------------------------------------------|---------------|-------|---------|---------------|---------|-------|---------|
| What the building area is predominately used for |               | N     | Percent | N             | Percent | N     | Percent |
| Group3PCA                                        | Office        | 119   | 100.0%  | 0             | 0.0%    | 119   | 100.0%  |
|                                                  | Manufacturing | 134   | 100.0%  | 0             | 0.0%    | 134   | 100.0%  |

#### Descriptives

| What the building area is predominately used for |                                  | Statistic   | Std. Error |
|--------------------------------------------------|----------------------------------|-------------|------------|
| Group3PCA                                        | Office                           | Mean        | .23874     |
|                                                  | 95% Confidence Interval for Mean | Lower Bound | 20.4096    |
|                                                  |                                  | Upper Bound | 21.3551    |
|                                                  | 5% Trimmed Mean                  | 20.9435     |            |
|                                                  | Median                           | 20.0000     |            |
|                                                  | Variance                         | 6.783       |            |
|                                                  | Std. Deviation                   | 2.60435     |            |
|                                                  | Minimum                          | 15.00       |            |
|                                                  | Maximum                          | 25.00       |            |
|                                                  | Range                            | 10.00       |            |
|                                                  | Interquartile Range              | 4.00        |            |

|               |                                  |             |         |        |
|---------------|----------------------------------|-------------|---------|--------|
| Manufacturing | Skewness                         |             | -.065   | .222   |
|               | Kurtosis                         |             | -.829   | .440   |
|               | Mean                             |             | 20.4328 | .19169 |
|               | 95% Confidence Interval for Mean | Lower Bound | 20.0537 |        |
|               |                                  | Upper Bound | 20.8120 |        |
|               | 5% Trimmed Mean                  |             | 20.4254 |        |
|               | Median                           |             | 20.0000 |        |
|               | Variance                         |             | 4.924   |        |
|               | Std. Deviation                   |             | 2.21901 |        |
|               | Minimum                          |             | 15.00   |        |
|               | Maximum                          |             | 25.00   |        |
|               | Range                            |             | 10.00   |        |
|               | Interquartile Range              |             | 3.00    |        |
|               | Skewness                         |             | .198    | .209   |
|               | Kurtosis                         |             | -.448   | .416   |

#### Tests of Normality

| What the building area is predominately used for |               | Kolmogorov-Smirnov <sup>a</sup> |     |       | Shapiro-Wilk |     |       |
|--------------------------------------------------|---------------|---------------------------------|-----|-------|--------------|-----|-------|
|                                                  |               | Statistic                       | df  | Sig.  | Statistic    | df  | Sig.  |
| Group3PCA                                        | Office        | .154                            | 119 | <.001 | .953         | 119 | <.001 |
|                                                  | Manufacturing | .167                            | 134 | <.001 | .962         | 134 | <.001 |

a. Lilliefors Significance Correction  
**Histograms**

#### Histogram

for OfficeOrManufacturing= Office

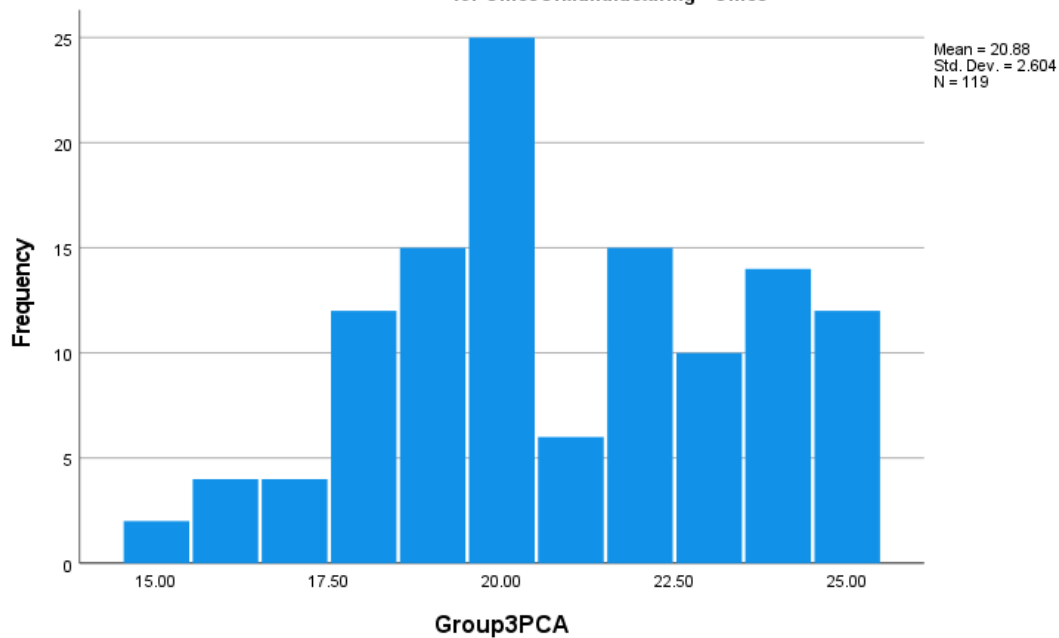

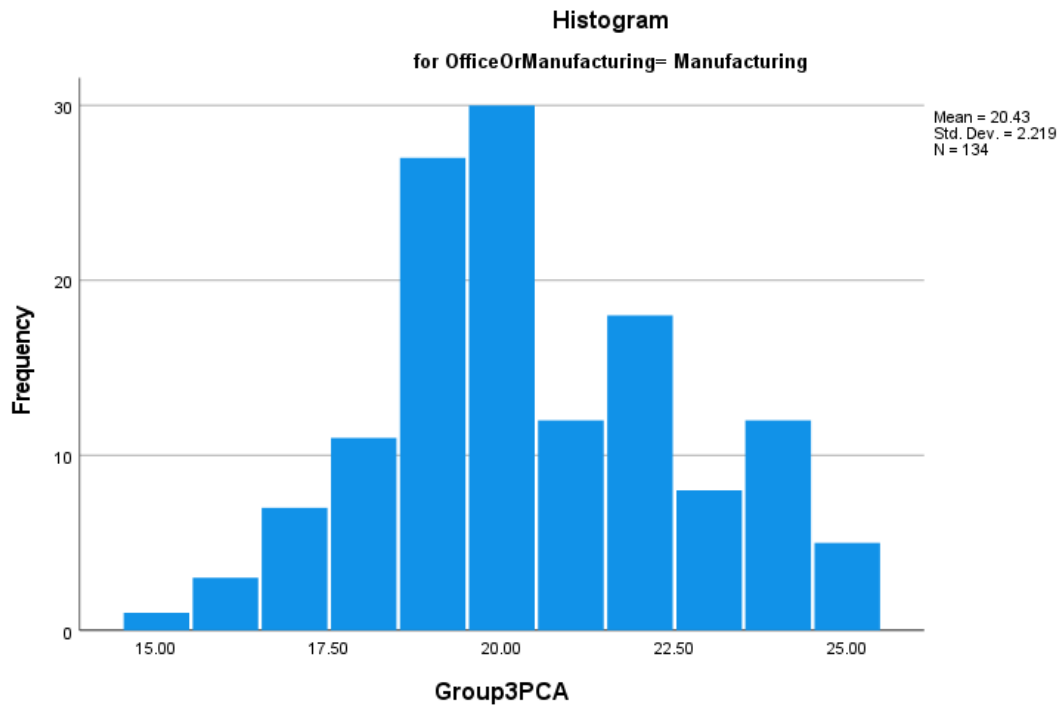

#### Normal Q-Q Plots

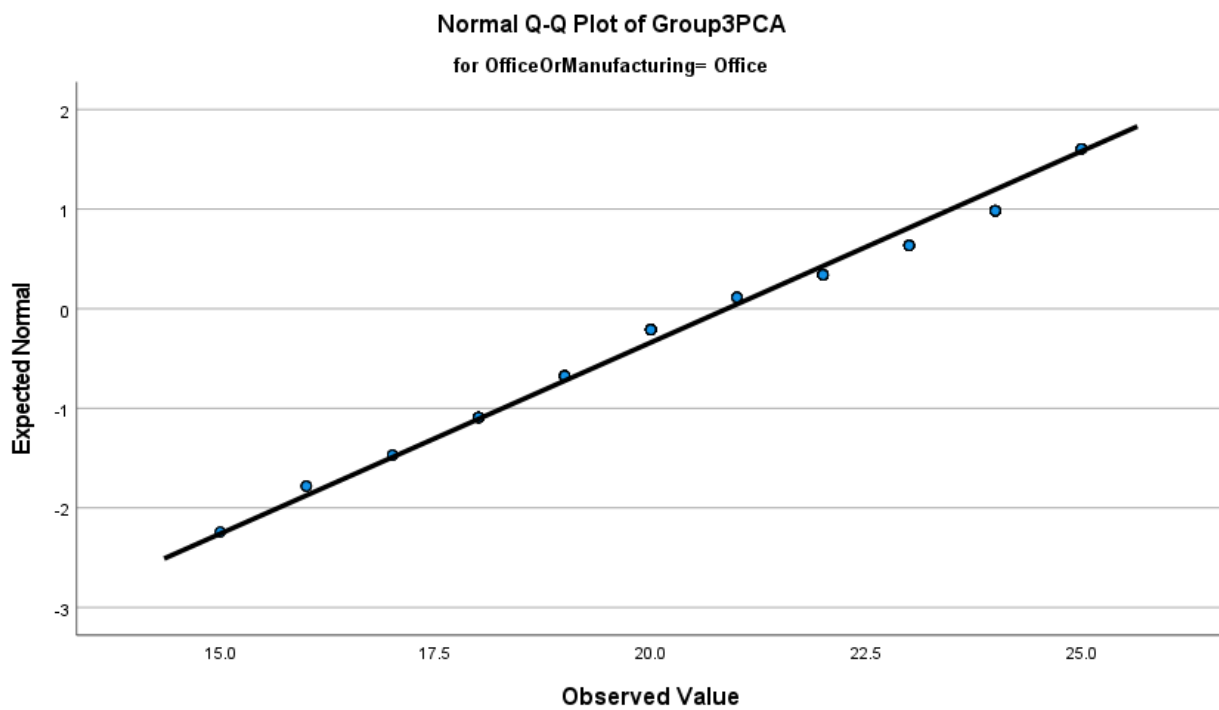

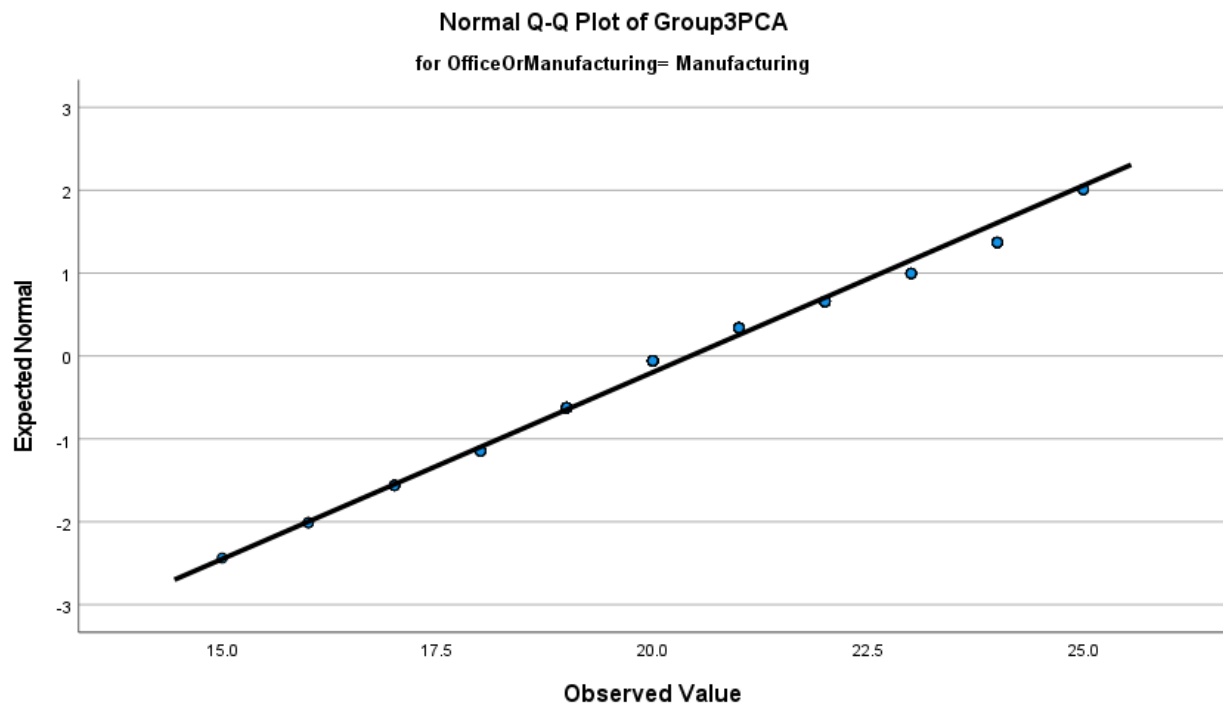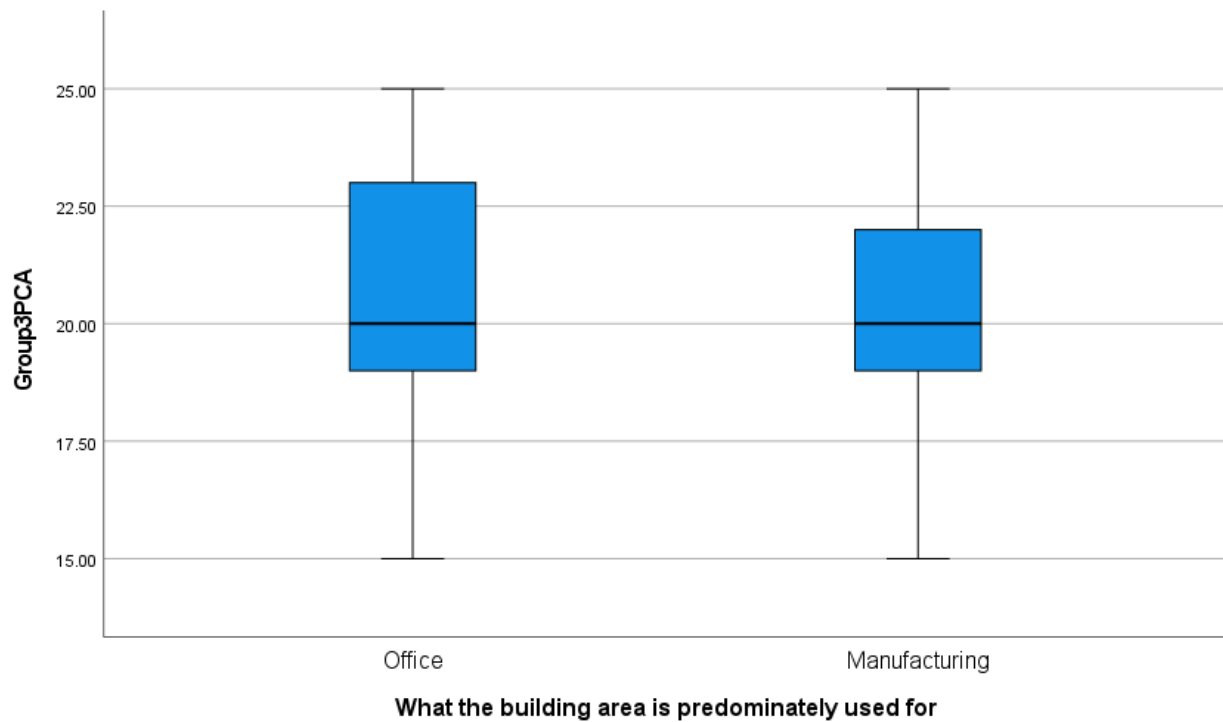

#### T-Test

|                                                  |               | Group Statistics |         |                |                 |
|--------------------------------------------------|---------------|------------------|---------|----------------|-----------------|
| What the building area is predominately used for |               | N                | Mean    | Std. Deviation | Std. Error Mean |
| Group3PCA                                        | Office        | 119              | 20.8824 | 2.60435        | .23874          |
|                                                  | Manufacturing | 134              | 20.4328 | 2.21901        | .19169          |

**Independent Samples Test**

|           |                                | Levene's Test for<br>Equality of Variances |      | t-test for Equality of Means |         |                 |                 |                    |                          | 95% Confidence<br>Interval of the<br>Difference |         |
|-----------|--------------------------------|--------------------------------------------|------|------------------------------|---------|-----------------|-----------------|--------------------|--------------------------|-------------------------------------------------|---------|
|           |                                | F                                          | Sig. | t                            | df      | One-<br>Sided p | Two-<br>Sided p | Mean<br>Difference | Std. Error<br>Difference | Lower                                           | Upper   |
| Group3PCA | Equal variances<br>assumed     | 5.973                                      | .015 | 1.482                        | 251     | .070            | .140            | .44952             | .30330                   | -.14781                                         | 1.04685 |
|           | Equal variances<br>not assumed |                                            |      | 1.468                        | 233.200 | .072            | .143            | .44952             | .30618                   | -.15371                                         | 1.05274 |

#### Independent Samples Effect Sizes

|           |                    |         |                           | 95% Confidence Interval |       |
|-----------|--------------------|---------|---------------------------|-------------------------|-------|
|           |                    |         | Standardizer <sup>a</sup> | Point Estimate          |       |
|           |                    |         |                           | Lower                   | Upper |
| Group3PCA | Cohen's d          | 2.40786 | .187                      | -.061                   | .434  |
|           | Hedges' correction | 2.41509 | .186                      | -.061                   | .433  |
|           | Glass's delta      | 2.21901 | .203                      | -.046                   | .450  |

a. The denominator used in estimating the effect sizes.

Cohen's d uses the pooled standard deviation.

Hedges' correction uses the pooled standard deviation, plus a correction factor.

Glass's delta uses the sample standard deviation of the control group.

**There are no longer any outliers in the data**

**Shapiro-wilk is significant which suggests data is not normally distributed, confirmed by box and whiskerplots and q-q plots.**

**Not appropriate to undertake independent t-test, explore other options such as mann-whitney test**

GROUP 4

**Explore**

**What the building area is predominately used for**

#### Case Processing Summary

|                                                     |               | Valid |         | Cases<br>Missing |         | Total |         |
|-----------------------------------------------------|---------------|-------|---------|------------------|---------|-------|---------|
| What the building area is<br>predominately used for |               | N     | Percent | N                | Percent | N     | Percent |
| Group4PCA                                           | Office        | 120   | 100.0%  | 0                | 0.0%    | 120   | 100.0%  |
|                                                     | Manufacturing | 136   | 100.0%  | 0                | 0.0%    | 136   | 100.0%  |

#### Descriptives

| What the building area is predominately used for |                                  | Statistic   | Std. Error |
|--------------------------------------------------|----------------------------------|-------------|------------|
| Group4PCA                                        | Office                           | Mean        | 21.9250    |
|                                                  | 95% Confidence Interval for Mean | Lower Bound | 21.2157    |
|                                                  |                                  | Upper Bound | 22.6343    |
|                                                  | 5% Trimmed Mean                  | 22.0463     |            |
|                                                  | Median                           | 22.0000     |            |
|                                                  | Variance                         | 15.398      |            |

|               |                                  |             |         |
|---------------|----------------------------------|-------------|---------|
| Manufacturing | Std. Deviation                   | 3.92399     |         |
|               | Minimum                          | 11.00       |         |
|               | Maximum                          | 30.00       |         |
|               | Range                            | 19.00       |         |
|               | Interquartile Range              | 4.75        |         |
|               | Skewness                         | -.349       | .221    |
|               | Kurtosis                         | .425        | .438    |
|               | Mean                             | 22.0588     | .33768  |
|               | 95% Confidence Interval for Mean | Lower Bound | 21.3910 |
|               |                                  | Upper Bound | 22.7266 |
|               | 5% Trimmed Mean                  | 22.1373     |         |
|               | Median                           | 22.0000     |         |
|               | Variance                         | 15.508      |         |
|               | Std. Deviation                   | 3.93797     |         |
|               | Minimum                          | 12.00       |         |
|               | Maximum                          | 30.00       |         |
|               | Range                            | 18.00       |         |
|               | Interquartile Range              | 6.00        |         |
|               | Skewness                         | -.300       | .208    |
|               | Kurtosis                         | -.416       | .413    |

| Tests of Normality                               |               |                                 |     |      |              |     |      |
|--------------------------------------------------|---------------|---------------------------------|-----|------|--------------|-----|------|
| What the building area is predominately used for |               | Kolmogorov-Smirnov <sup>a</sup> |     |      | Shapiro-Wilk |     |      |
|                                                  |               | Statistic                       | df  | Sig. | Statistic    | df  | Sig. |
| Group4PCA                                        | Office        | .087                            | 120 | .027 | .973         | 120 | .018 |
|                                                  | Manufacturing | .090                            | 136 | .009 | .981         | 136 | .057 |

a. Lilliefors Significance Correction

## Group4PCA Histograms

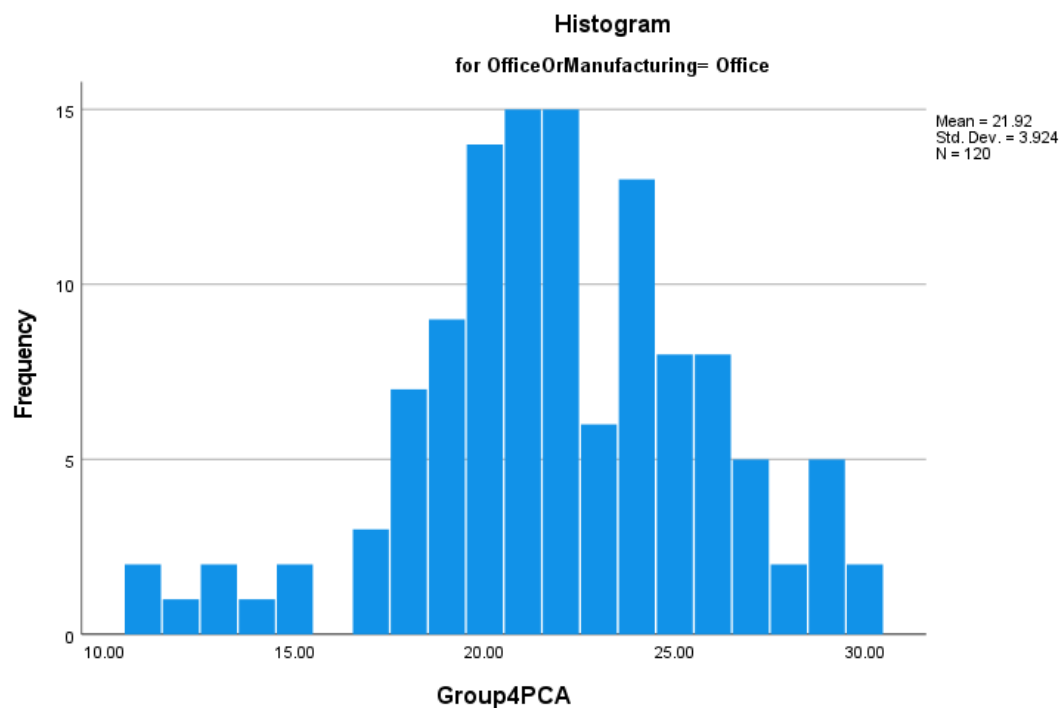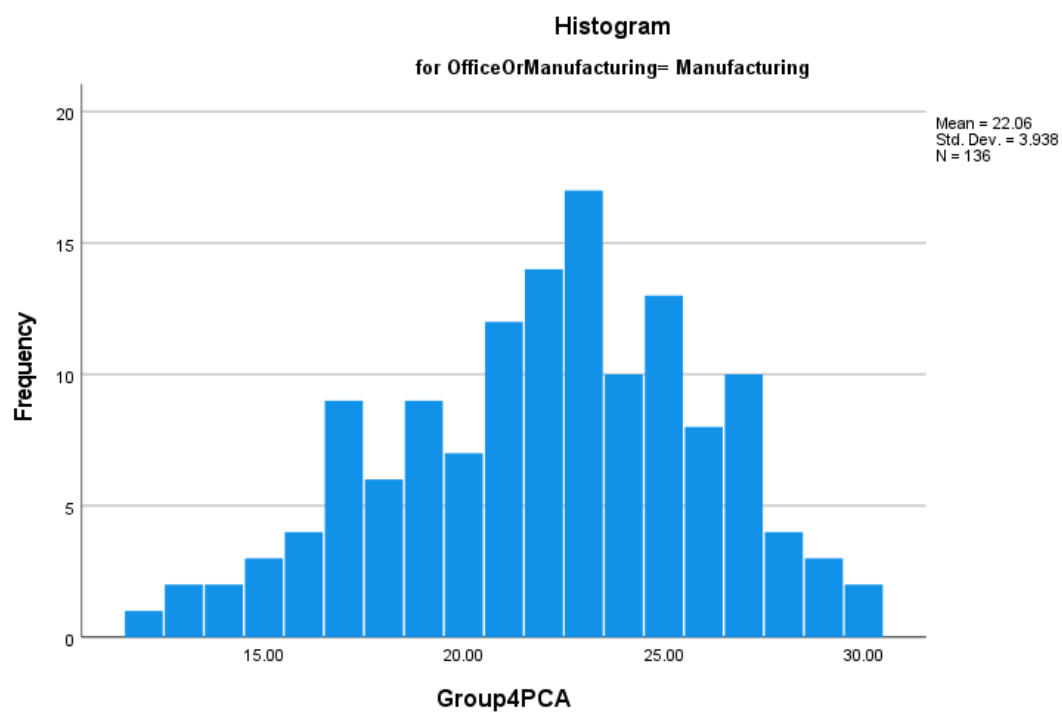

Normal Q-Q Plots



Normal Q-Q Plot of Group4PCA  
for OfficeOrManufacturing= Office

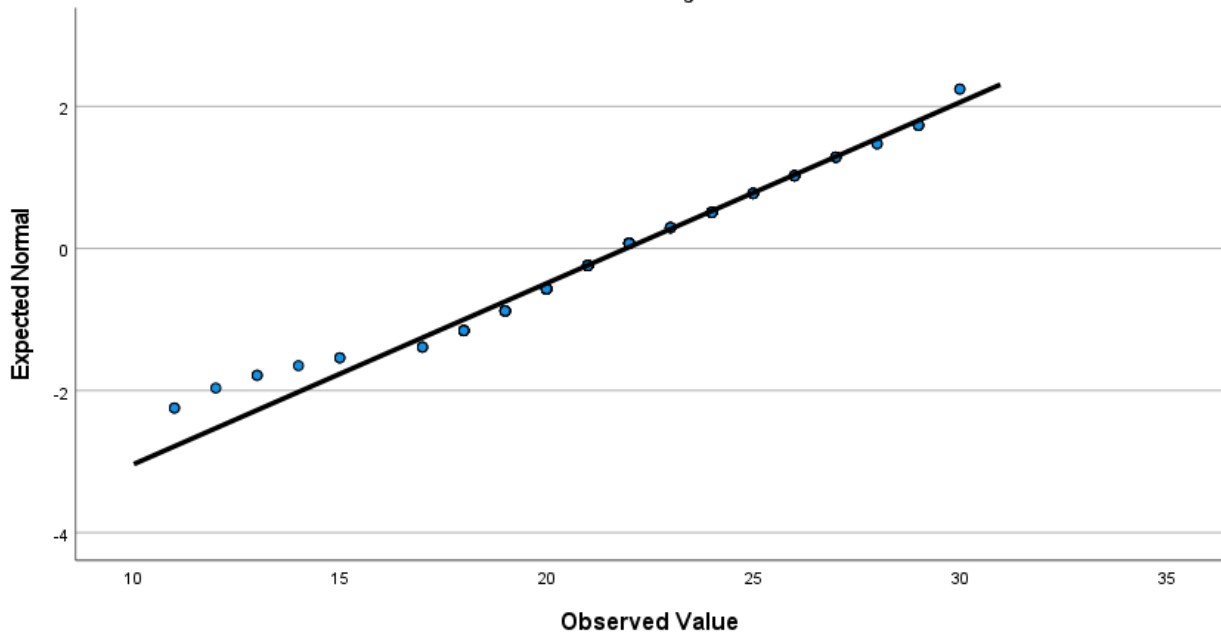

Normal Q-Q Plot of Group4PCA  
for OfficeOrManufacturing= Manufacturing

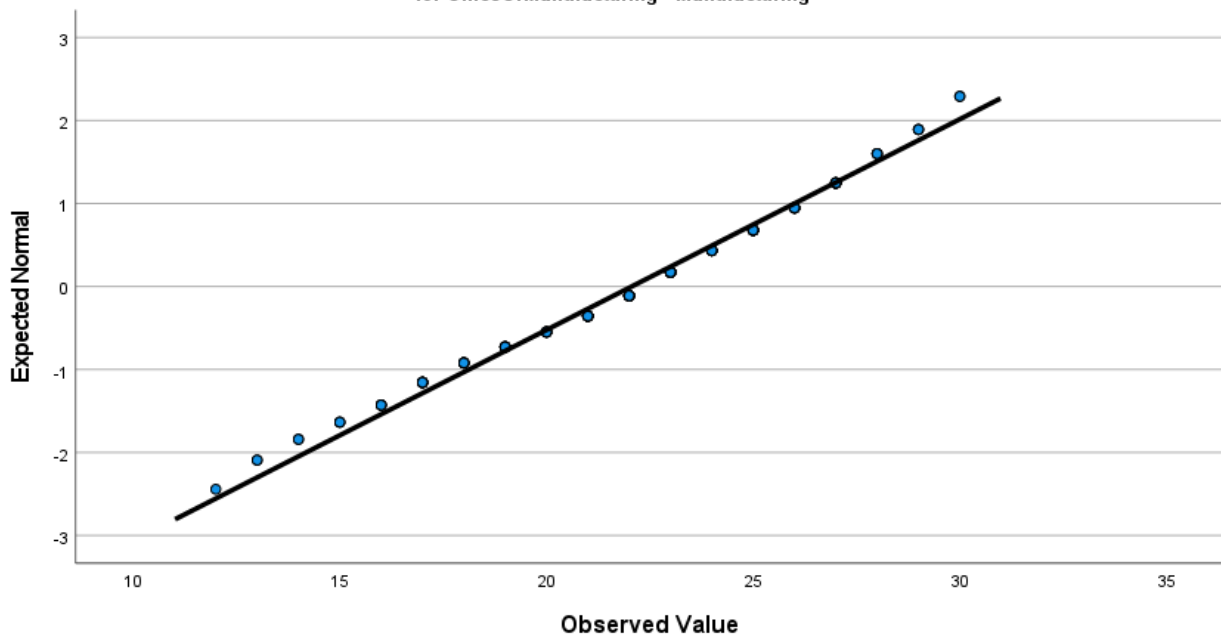

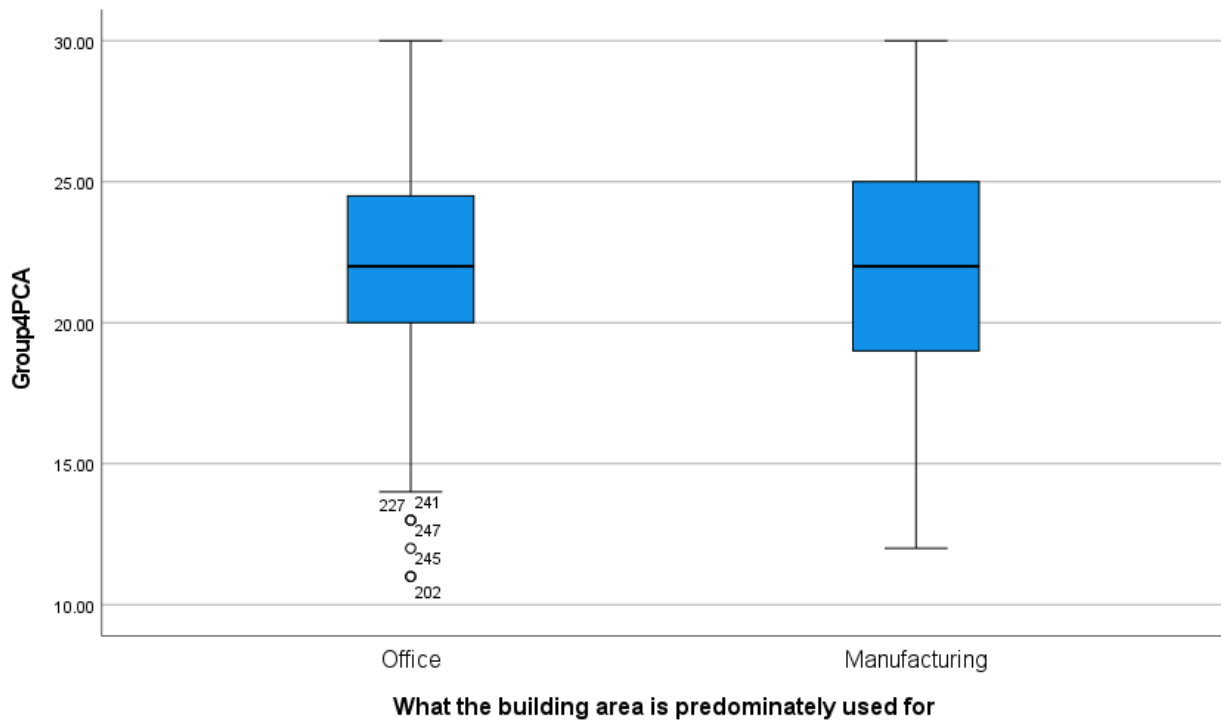

## T-Test

| Group Statistics                                 |               |     |         |                |                 |
|--------------------------------------------------|---------------|-----|---------|----------------|-----------------|
| What the building area is predominately used for |               | N   | Mean    | Std. Deviation | Std. Error Mean |
| Group4PCA                                        | Office        | 120 | 21.9250 | 3.92399        | .35821          |
|                                                  | Manufacturing | 136 | 22.0588 | 3.93797        | .33768          |

| Independent Samples Test |                             |                                         |      |                              |         |              |             |                 |                       |                                           |        |
|--------------------------|-----------------------------|-----------------------------------------|------|------------------------------|---------|--------------|-------------|-----------------|-----------------------|-------------------------------------------|--------|
|                          |                             | Levene's Test for Equality of Variances |      | t-test for Equality of Means |         |              |             |                 |                       | 95% Confidence Interval of the Difference |        |
|                          |                             | F                                       | Sig. | t                            | df      | Significance |             | Mean Difference | Std. Error Difference |                                           |        |
|                          |                             |                                         |      |                              |         | One-Sided p  | Two-Sided p |                 |                       |                                           |        |
| Group4PCA                | Equal variances assumed     | .245                                    | .621 | -.272                        | 254     | .393         | .786        | -.13382         | .49239                | -1.10351                                  | .83587 |
|                          | Equal variances not assumed |                                         |      | -.272                        | 250.263 | .393         | .786        | -.13382         | .49228                | -1.10337                                  | .83572 |

| Independent Samples Effect Sizes |                    |                           |                |                         |      |
|----------------------------------|--------------------|---------------------------|----------------|-------------------------|------|
|                                  |                    | Standardizer <sup>a</sup> | Point Estimate | 95% Confidence Interval |      |
| Group4PCA                        | Cohen's d          | 3.93143                   | -.034          | -.279                   | .211 |
|                                  | Hedges' correction | 3.94308                   | -.034          | -.279                   | .211 |
|                                  | Glass's delta      | 3.93797                   | -.034          | -.279                   | .212 |

- a. The denominator used in estimating the effect sizes.
- Cohen's d uses the pooled standard deviation.
- Hedges' correction uses the pooled standard deviation, plus a correction factor.
- Glass's delta uses the sample standard deviation of the control group.

several outliers identified - 247, 245, 241, 227, 202  
 Remove these and re-run descriptive and t-test

What the building area is predominately used for

| Case Processing Summary                          |               |       |         |               |         |       |         |
|--------------------------------------------------|---------------|-------|---------|---------------|---------|-------|---------|
| What the building area is predominately used for |               | Valid |         | Cases Missing |         | Total |         |
|                                                  |               | N     | Percent | N             | Percent | N     | Percent |
| Group4PCA                                        | Office        | 115   | 100.0%  | 0             | 0.0%    | 115   | 100.0%  |
|                                                  | Manufacturing | 136   | 100.0%  | 0             | 0.0%    | 136   | 100.0%  |

| Descriptives                                     |               |                                  |             |            |  |  |
|--------------------------------------------------|---------------|----------------------------------|-------------|------------|--|--|
| What the building area is predominately used for |               |                                  | Statistic   | Std. Error |  |  |
| Group4PCA                                        | Office        | Mean                             | 22.3565     | .31664     |  |  |
|                                                  |               | 95% Confidence Interval for Mean | Lower Bound | 21.7293    |  |  |
|                                                  |               |                                  | Upper Bound | 22.9838    |  |  |
|                                                  |               | 5% Trimmed Mean                  | 22.3333     |            |  |  |
|                                                  |               | Median                           | 22.0000     |            |  |  |
|                                                  |               | Variance                         | 11.530      |            |  |  |
|                                                  |               | Std. Deviation                   | 3.39554     |            |  |  |
|                                                  |               | Minimum                          | 14.00       |            |  |  |
|                                                  |               | Maximum                          | 30.00       |            |  |  |
|                                                  |               | Range                            | 16.00       |            |  |  |
|                                                  |               | Interquartile Range              | 5.00        |            |  |  |
|                                                  |               | Skewness                         | .190        | .226       |  |  |
|                                                  |               | Kurtosis                         | -.287       | .447       |  |  |
|                                                  | Manufacturing | Mean                             | 22.0588     | .33768     |  |  |
|                                                  |               | 95% Confidence Interval for Mean | Lower Bound | 21.3910    |  |  |
|                                                  |               |                                  | Upper Bound | 22.7266    |  |  |
|                                                  |               | 5% Trimmed Mean                  | 22.1373     |            |  |  |
|                                                  |               | Median                           | 22.0000     |            |  |  |
|                                                  |               | Variance                         | 15.508      |            |  |  |
|                                                  |               | Std. Deviation                   | 3.93797     |            |  |  |
|                                                  |               | Minimum                          | 12.00       |            |  |  |
|                                                  |               | Maximum                          | 30.00       |            |  |  |
|                                                  |               | Range                            | 18.00       |            |  |  |
|                                                  |               | Interquartile Range              | 6.00        |            |  |  |
|                                                  |               | Skewness                         | -.300       | .208       |  |  |
|                                                  |               | Kurtosis                         | -.416       | .413       |  |  |

|                                                  |               | Tests of Normality              |     |       |              |     |      |
|--------------------------------------------------|---------------|---------------------------------|-----|-------|--------------|-----|------|
| What the building area is predominately used for |               | Kolmogorov-Smirnov <sup>a</sup> |     |       | Shapiro-Wilk |     |      |
|                                                  |               | Statistic                       | df  | Sig.  | Statistic    | df  | Sig. |
| Group4PCA                                        | Office        | .116                            | 115 | <.001 | .980         | 115 | .083 |
|                                                  | Manufacturing | .090                            | 136 | .009  | .981         | 136 | .057 |

a. Lilliefors Significance Correction

Group4PCA

Histograms

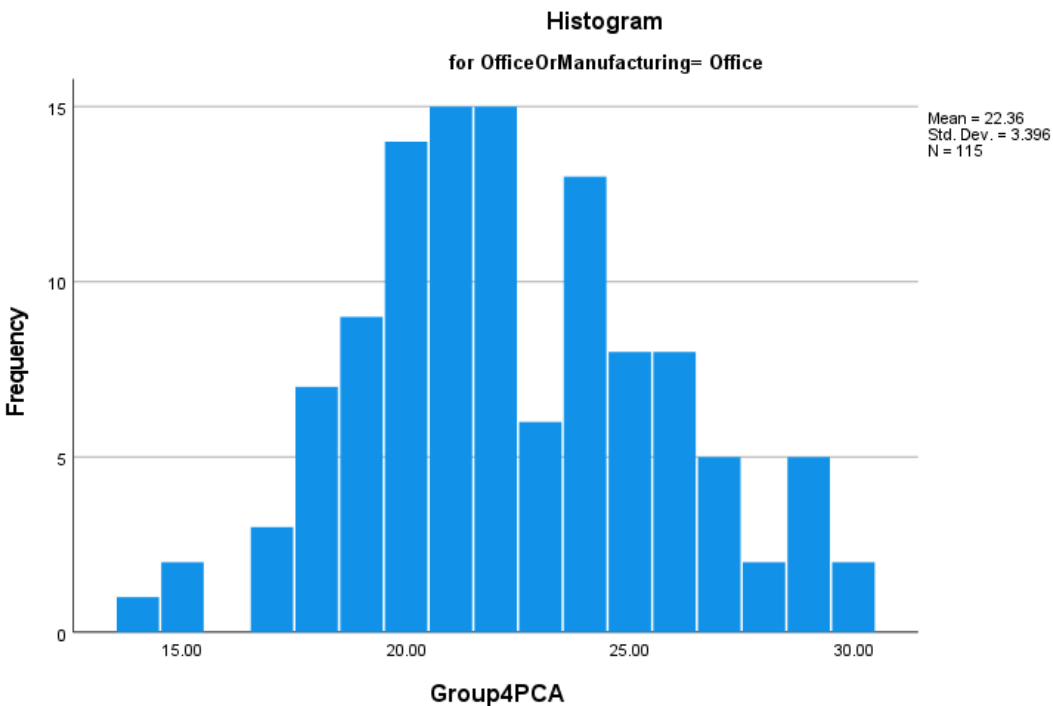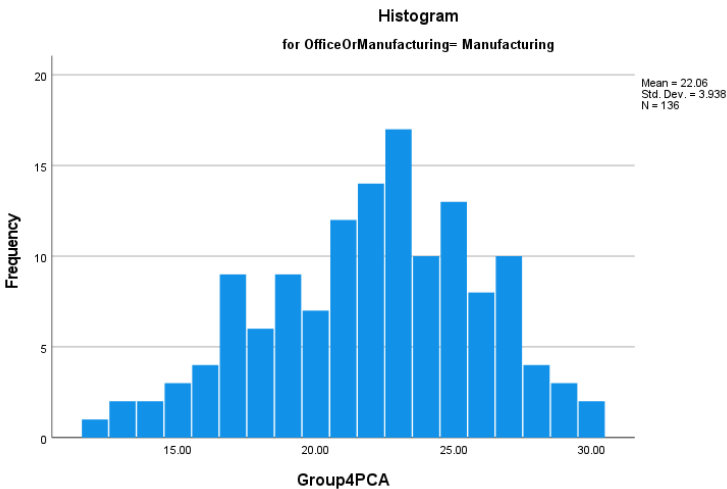

Normal Q-Q Plots

Normal Q-Q Plot of Group4PCA

for OfficeOrManufacturing= Office

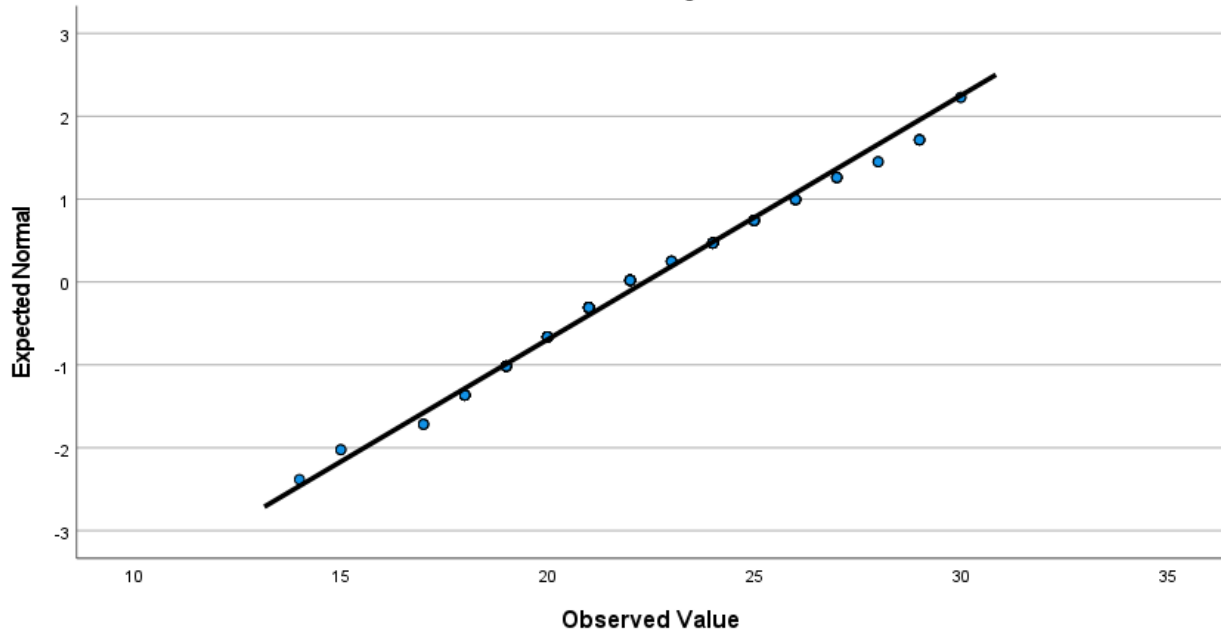

Normal Q-Q Plot of Group4PCA

for OfficeOrManufacturing= Manufacturing

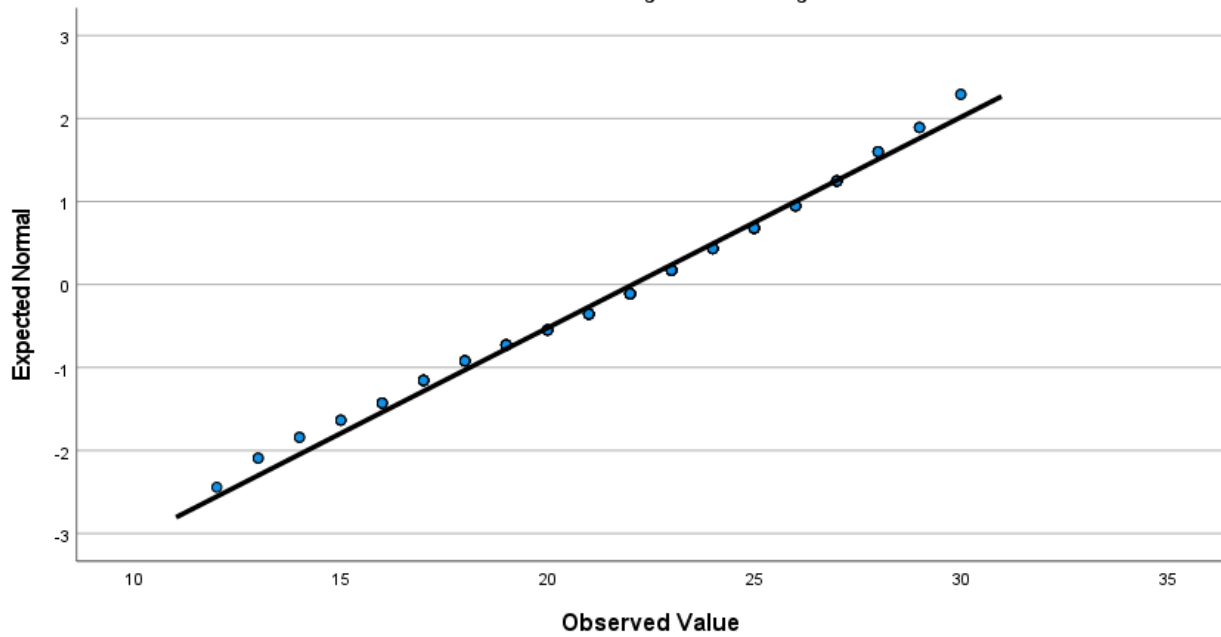

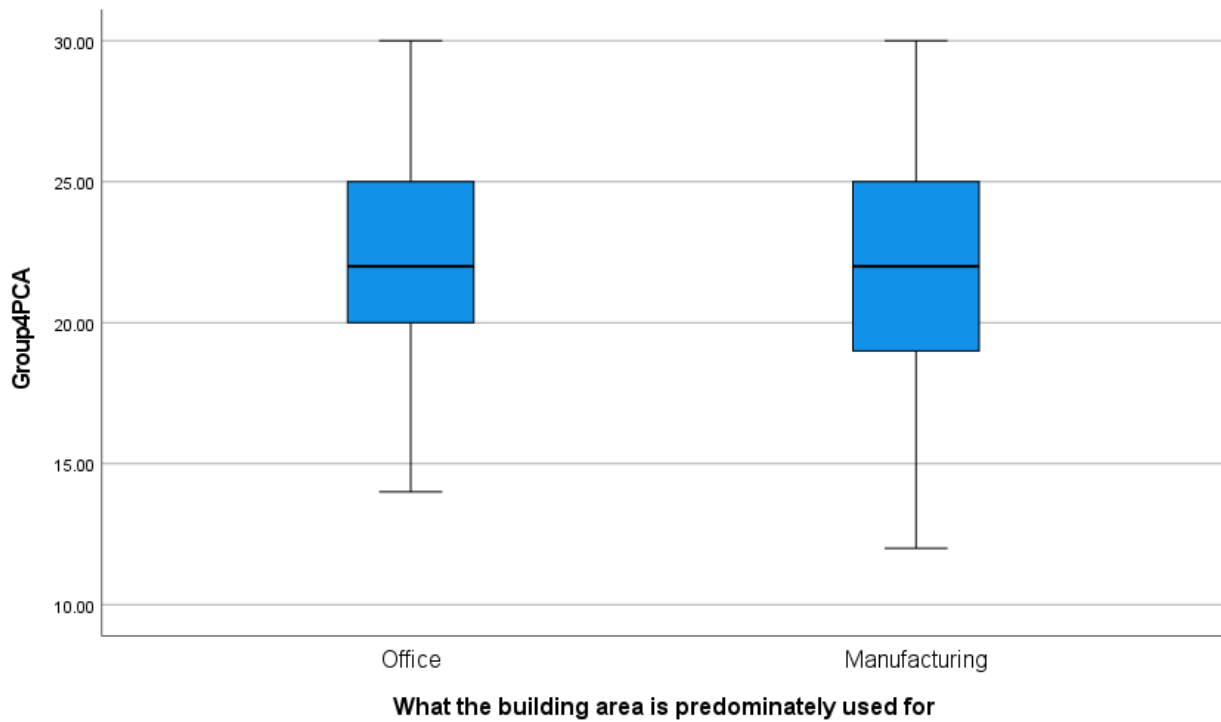

## T-Test

| Group Statistics                                 |               |     |         |                |                 |
|--------------------------------------------------|---------------|-----|---------|----------------|-----------------|
| What the building area is predominately used for |               | N   | Mean    | Std. Deviation | Std. Error Mean |
| Group4PCA                                        | Office        | 115 | 22.3565 | 3.39554        | .31664          |
|                                                  | Manufacturing | 136 | 22.0588 | 3.93797        | .33768          |

| Independent Samples Test                |                             |       |      |                              |         |                          |                          |                 |                       |                                           |
|-----------------------------------------|-----------------------------|-------|------|------------------------------|---------|--------------------------|--------------------------|-----------------|-----------------------|-------------------------------------------|
| Levene's Test for Equality of Variances |                             |       |      | t-test for Equality of Means |         |                          |                          |                 |                       | 95% Confidence Interval of the Difference |
|                                         |                             | F     | Sig. | t                            | df      | Significance One-Sided p | Significance Two-Sided p | Mean Difference | Std. Error Difference |                                           |
| Group4PCA                               | Equal variances assumed     | 2.175 | .142 | .635                         | 249     | .263                     | .526                     | .29770          | .46867                | -1.22075                                  |
|                                         | Equal variances not assumed |       |      | .643                         | 248.899 | .260                     | .521                     | .29770          | .46291                | 1.20942                                   |

| Independent Samples Effect Sizes |                    |                           |                |                         |       |
|----------------------------------|--------------------|---------------------------|----------------|-------------------------|-------|
|                                  |                    | Standardizer <sup>a</sup> | Point Estimate | 95% Confidence Interval |       |
|                                  |                    |                           |                | Lower                   | Upper |
| Group4PCA                        | Cohen's d          | 3.69951                   | .080           | -.168                   | .329  |
|                                  | Hedges' correction | 3.71070                   | .080           | -.167                   | .328  |
|                                  | Glass's delta      | 3.93797                   | .076           | -.173                   | .324  |

a. The denominator used in estimating the effect sizes.

Cohen's d uses the pooled standard deviation.

Hedges' correction uses the pooled standard deviation, plus a correction factor.

Glass's delta uses the sample standard deviation of the control group.

**No further significant outliers found**

**Shapiro-wilk test of normality is not longer significant (results are greater than 0.05)**

Proceed with reporting independent t-test results

## GROUP 5

**Descriptive and t-test (similar to above but for group 5)**

**What the building area is predominately used for**

### Case Processing Summary

| What the building area is<br>predominately used for |               | Valid |         | Cases<br>Missing |         | Total |         |
|-----------------------------------------------------|---------------|-------|---------|------------------|---------|-------|---------|
|                                                     |               | N     | Percent | N                | Percent | N     | Percent |
| Group5PCA                                           | Office        | 120   | 100.0%  | 0                | 0.0%    | 120   | 100.0%  |
|                                                     | Manufacturing | 136   | 100.0%  | 0                | 0.0%    | 136   | 100.0%  |

### Descriptives

| What the building area is predominately used for |               |                                  | Statistic   | Std. Error |
|--------------------------------------------------|---------------|----------------------------------|-------------|------------|
| Group5PCA                                        | Office        | Mean                             | 17.2333     | .24419     |
|                                                  |               | 95% Confidence Interval for Mean | Lower Bound | 16.7498    |
|                                                  |               |                                  | Upper Bound | 17.7168    |
|                                                  |               | 5% Trimmed Mean                  | 17.4722     |            |
|                                                  |               | Median                           | 18.0000     |            |
|                                                  |               | Variance                         | 7.155       |            |
|                                                  |               | Std. Deviation                   | 2.67492     |            |
|                                                  |               | Minimum                          | 7.00        |            |
|                                                  |               | Maximum                          | 20.00       |            |
|                                                  |               | Range                            | 13.00       |            |
|                                                  |               | Interquartile Range              | 4.00        |            |
|                                                  |               | Skewness                         | -1.232      | .221       |
|                                                  |               | Kurtosis                         | 2.131       | .438       |
|                                                  | Manufacturing | Mean                             | 16.4853     | .25988     |
|                                                  |               | 95% Confidence Interval for Mean | Lower Bound | 15.9713    |
|                                                  |               |                                  | Upper Bound | 16.9993    |
|                                                  |               | 5% Trimmed Mean                  | 16.7582     |            |
|                                                  |               | Median                           | 17.0000     |            |
|                                                  |               | Variance                         | 9.185       |            |
|                                                  |               | Std. Deviation                   | 3.03067     |            |
|                                                  |               | Minimum                          | 4.00        |            |
|                                                  |               | Maximum                          | 20.00       |            |
|                                                  |               | Range                            | 16.00       |            |
|                                                  |               | Interquartile Range              | 4.00        |            |
|                                                  |               | Skewness                         | -1.189      | .208       |
|                                                  |               | Kurtosis                         | 2.350       | .413       |

|                                                  |               | Tests of Normality              |     |       |              |     |       |
|--------------------------------------------------|---------------|---------------------------------|-----|-------|--------------|-----|-------|
| What the building area is predominately used for |               | Kolmogorov-Smirnov <sup>a</sup> |     |       | Shapiro-Wilk |     |       |
|                                                  |               | Statistic                       | df  | Sig.  | Statistic    | df  | Sig.  |
| Group5PCA                                        | Office        | .163                            | 120 | <.001 | .873         | 120 | <.001 |
|                                                  | Manufacturing | .128                            | 136 | <.001 | .895         | 136 | <.001 |

a. Lilliefors Significance Correction

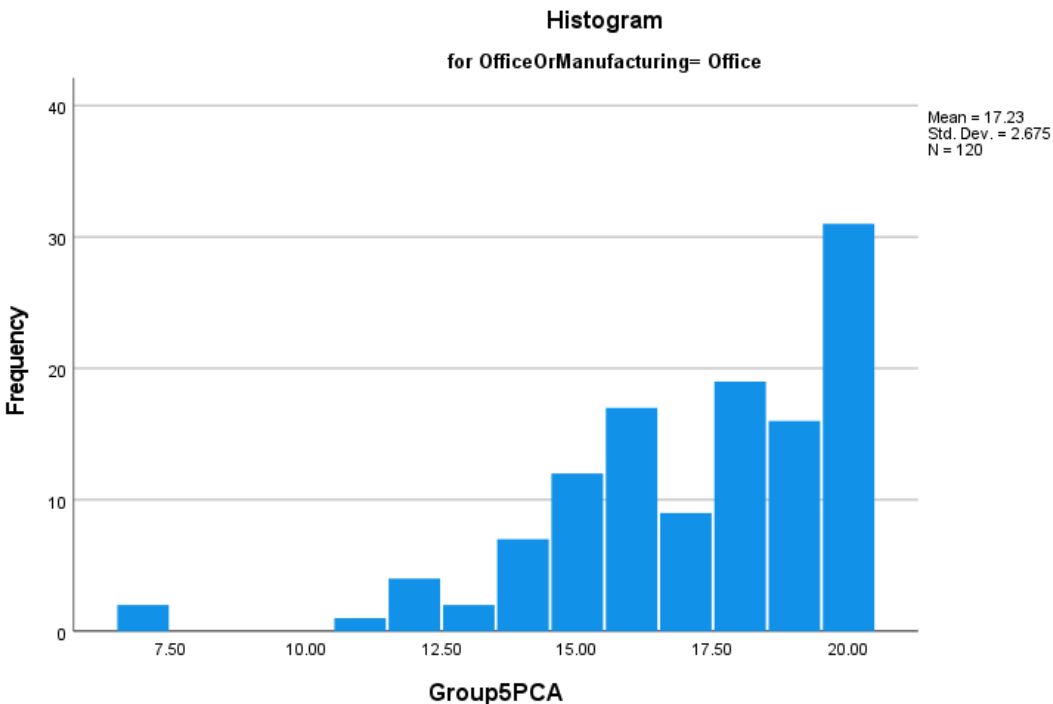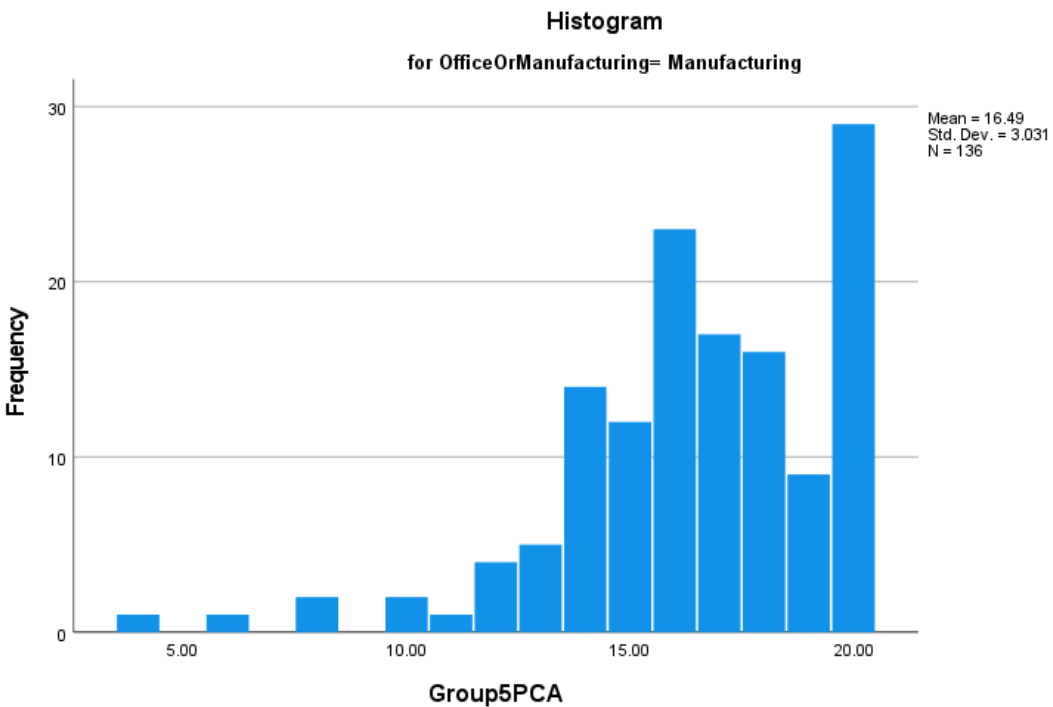

Normal Q-Q Plots



Normal Q-Q Plot of Group5PCA

for OfficeOrManufacturing= Office

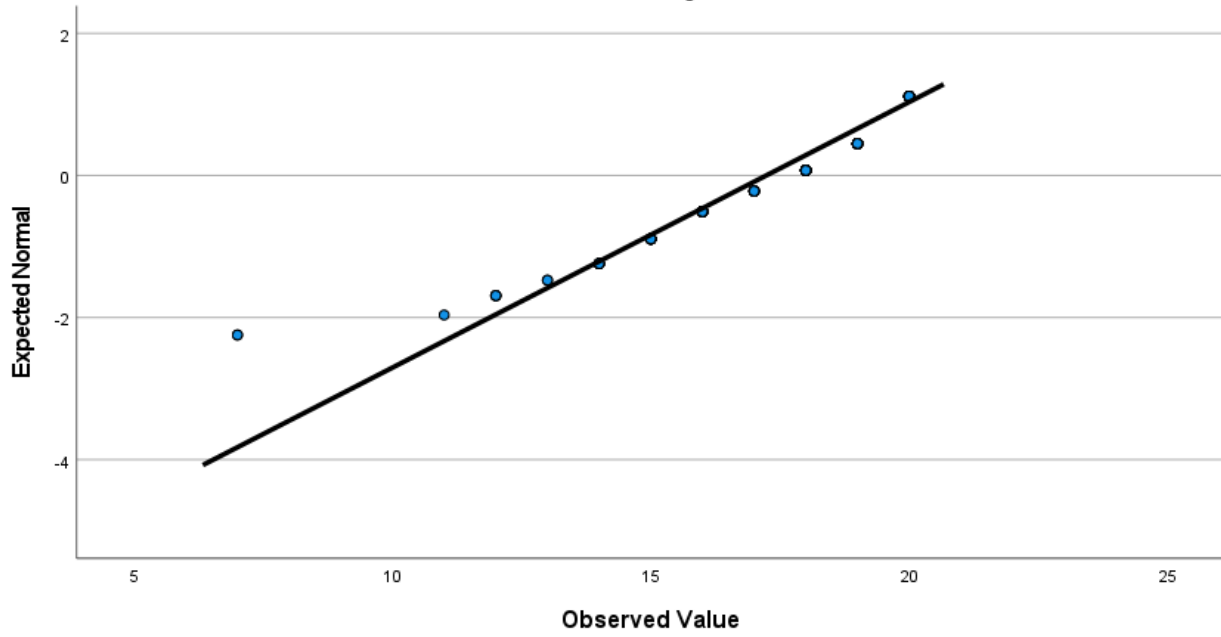

Normal Q-Q Plot of Group5PCA

for OfficeOrManufacturing= Manufacturing

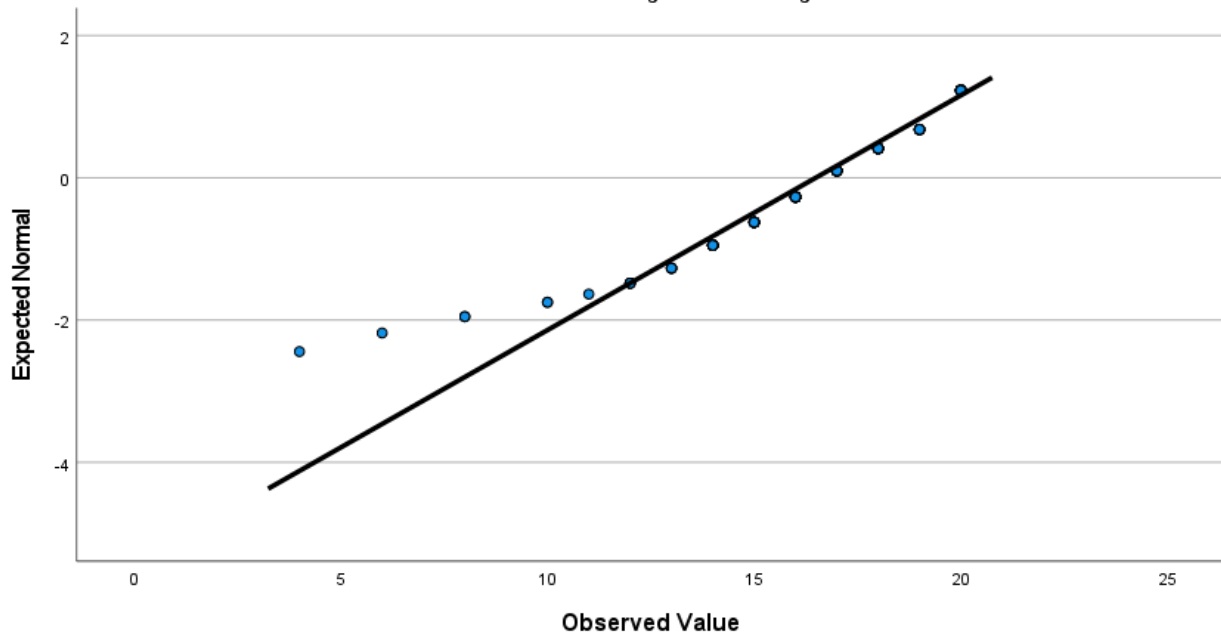

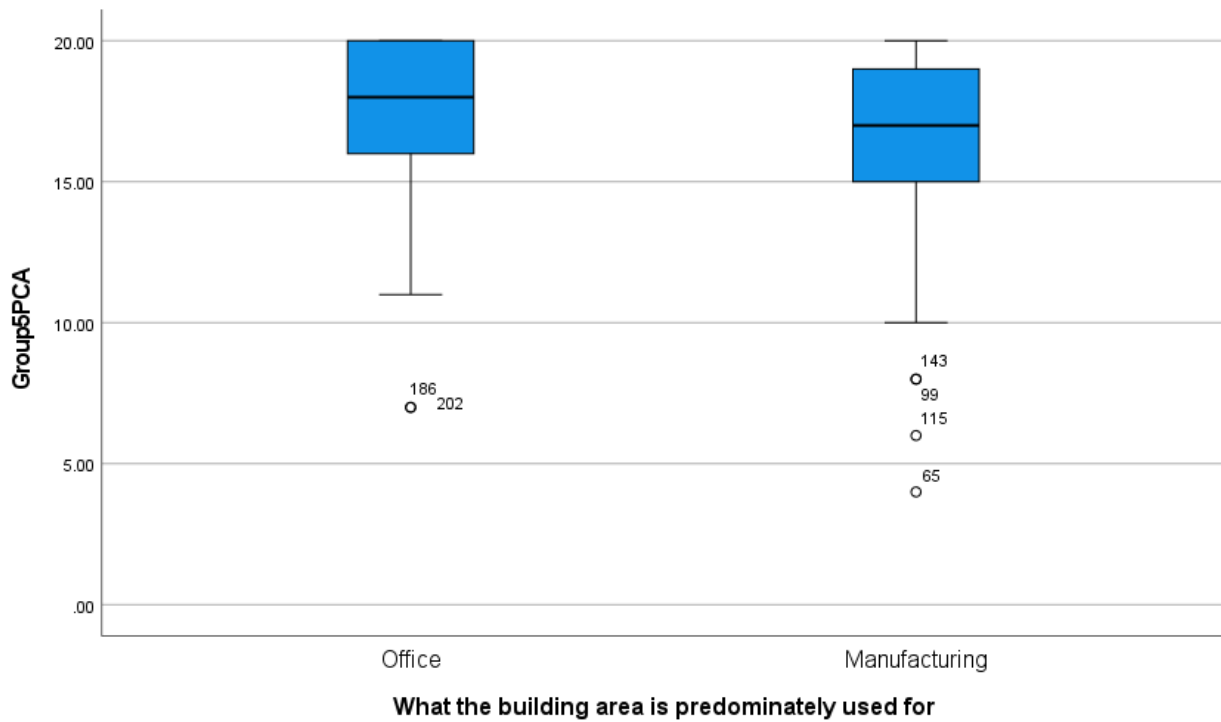

## T-Test

| Group Statistics                                 |               |     |         |                |                 |
|--------------------------------------------------|---------------|-----|---------|----------------|-----------------|
| What the building area is predominately used for |               | N   | Mean    | Std. Deviation | Std. Error Mean |
| Group5PCA                                        | Office        | 120 | 17.2333 | 2.67492        | .24419          |
|                                                  | Manufacturing | 136 | 16.4853 | 3.03067        | .25988          |

| Independent Samples Test                |                             |      |      |                              |         |                          |                          |                 |                       |                                                       |
|-----------------------------------------|-----------------------------|------|------|------------------------------|---------|--------------------------|--------------------------|-----------------|-----------------------|-------------------------------------------------------|
| Levene's Test for Equality of Variances |                             |      |      | t-test for Equality of Means |         |                          |                          |                 |                       |                                                       |
|                                         |                             | F    | Sig. | t                            | df      | Significance One-Sided p | Significance Two-Sided p | Mean Difference | Std. Error Difference | 95% Confidence Interval of the Difference Lower Upper |
| Group5PCA                               | Equal variances assumed     | .602 | .439 | 2.081                        | 254     | .019                     | .038                     | .74804          | .35939                | .04028 1.45580                                        |
|                                         | Equal variances not assumed |      |      | 2.098                        | 254.000 | .018                     | .037                     | .74804          | .35660                | .04577 1.45031                                        |

| Independent Samples Effect Sizes |                    |                           |                |                         |       |
|----------------------------------|--------------------|---------------------------|----------------|-------------------------|-------|
|                                  |                    | Standardizer <sup>a</sup> | Point Estimate | 95% Confidence Interval |       |
|                                  |                    |                           |                | Lower                   | Upper |
| Group5PCA                        | Cohen's d          | 2.86950                   | .261           | .014                    | .507  |
|                                  | Hedges' correction | 2.87800                   | .260           | .014                    | .505  |
|                                  | Glass's delta      | 3.03067                   | .247           | -.001                   | .494  |

- a. The denominator used in estimating the effect sizes.
- Cohen's d uses the pooled standard deviation.
- Hedges' correction uses the pooled standard deviation, plus a correction factor.
- Glass's delta uses the sample standard deviation of the control group.

The above highlights 202, 186, 143, 115, 99, 65 as outliers  
remove and re-run descriptives and t-test

Explore  
What the building area is predominately used for

| Case Processing Summary                          |               |       |         |               |         |       |         |
|--------------------------------------------------|---------------|-------|---------|---------------|---------|-------|---------|
| What the building area is predominately used for |               | Valid |         | Cases Missing |         | Total |         |
|                                                  |               | N     | Percent | N             | Percent | N     | Percent |
| Group5PCA                                        | Office        | 118   | 100.0%  | 0             | 0.0%    | 118   | 100.0%  |
|                                                  | Manufacturing | 132   | 100.0%  | 0             | 0.0%    | 132   | 100.0%  |

| Descriptives                                     |               |                                  |             |           |            |
|--------------------------------------------------|---------------|----------------------------------|-------------|-----------|------------|
| What the building area is predominately used for |               |                                  |             | Statistic | Std. Error |
| Group5PCA                                        | Office        | Mean                             |             | 17.4068   | .21505     |
|                                                  |               | 95% Confidence Interval for Mean | Lower Bound | 16.9809   |            |
|                                                  |               |                                  | Upper Bound | 17.8327   |            |
|                                                  |               | 5% Trimmed Mean                  |             | 17.5640   |            |
|                                                  |               | Median                           |             | 18.0000   |            |
|                                                  |               | Variance                         |             | 5.457     |            |
|                                                  |               | Std. Deviation                   |             | 2.33603   |            |
|                                                  |               | Minimum                          |             | 11.00     |            |
|                                                  |               | Maximum                          |             | 20.00     |            |
|                                                  |               | Range                            |             | 9.00      |            |
|                                                  |               | Interquartile Range              |             | 4.00      |            |
|                                                  |               | Skewness                         |             | -.647     | .223       |
|                                                  |               | Kurtosis                         |             | -.427     | .442       |
|                                                  | Manufacturing | Mean                             |             | 16.7879   | .21751     |
|                                                  |               | 95% Confidence Interval for Mean | Lower Bound | 16.3576   |            |
|                                                  |               |                                  | Upper Bound | 17.2182   |            |
|                                                  |               | 5% Trimmed Mean                  |             | 16.9175   |            |
|                                                  |               | Median                           |             | 17.0000   |            |
|                                                  |               | Variance                         |             | 6.245     |            |
|                                                  |               | Std. Deviation                   |             | 2.49895   |            |
|                                                  |               | Minimum                          |             | 10.00     |            |
|                                                  |               | Maximum                          |             | 20.00     |            |
|                                                  |               | Range                            |             | 10.00     |            |
|                                                  |               | Interquartile Range              |             | 4.00      |            |
|                                                  |               | Skewness                         |             | -.410     | .211       |
|                                                  |               | Kurtosis                         |             | -.444     | .419       |

| Tests of Normality                               |               |                                 |     |       |              |     |       |
|--------------------------------------------------|---------------|---------------------------------|-----|-------|--------------|-----|-------|
| What the building area is predominately used for |               | Kolmogorov-Smirnov <sup>a</sup> |     |       | Shapiro-Wilk |     |       |
|                                                  |               | Statistic                       | df  | Sig.  | Statistic    | df  | Sig.  |
| Group5PCA                                        | Office        | .160                            | 118 | <.001 | .902         | 118 | <.001 |
|                                                  | Manufacturing | .120                            | 132 | <.001 | .934         | 132 | <.001 |

a. Lilliefors Significance Correction

Group5PCA  
Histograms

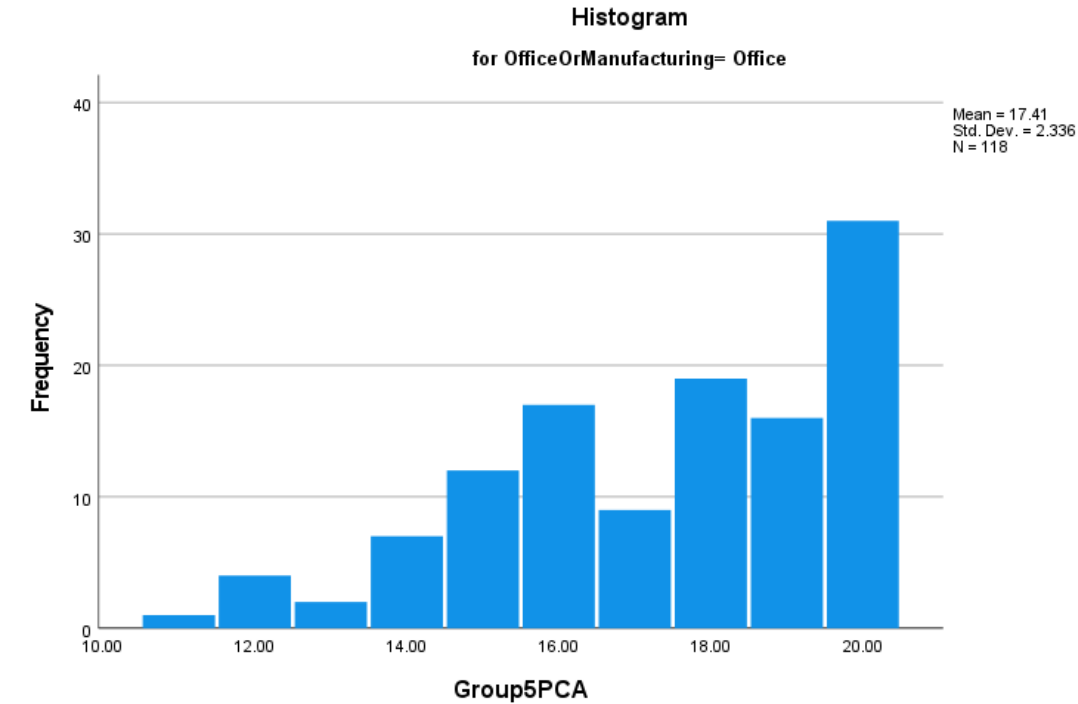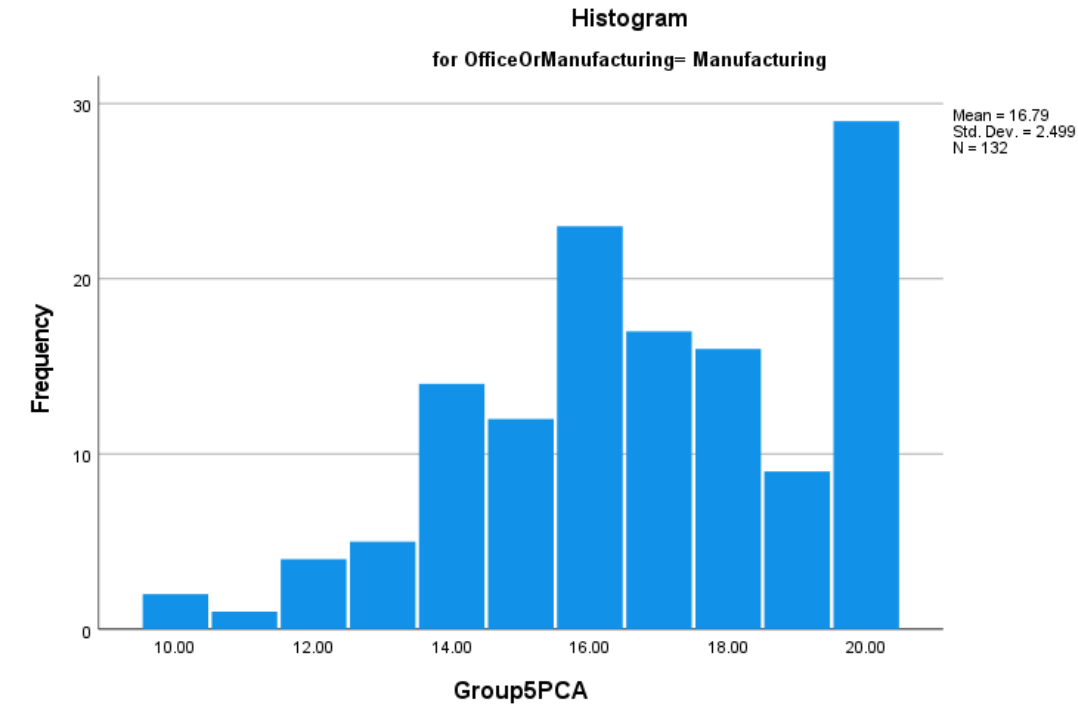

Normal Q-Q Plots

Normal Q-Q Plot of Group5PCA  
for OfficeOrManufacturing= Office

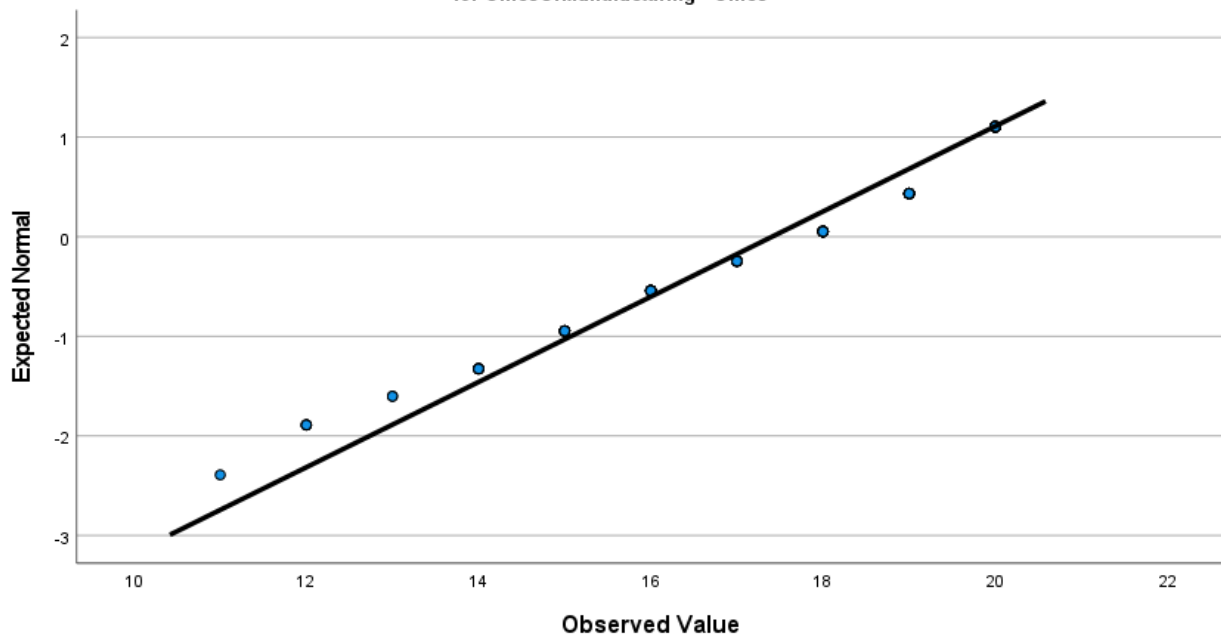

Normal Q-Q Plot of Group5PCA  
for OfficeOrManufacturing= Manufacturing

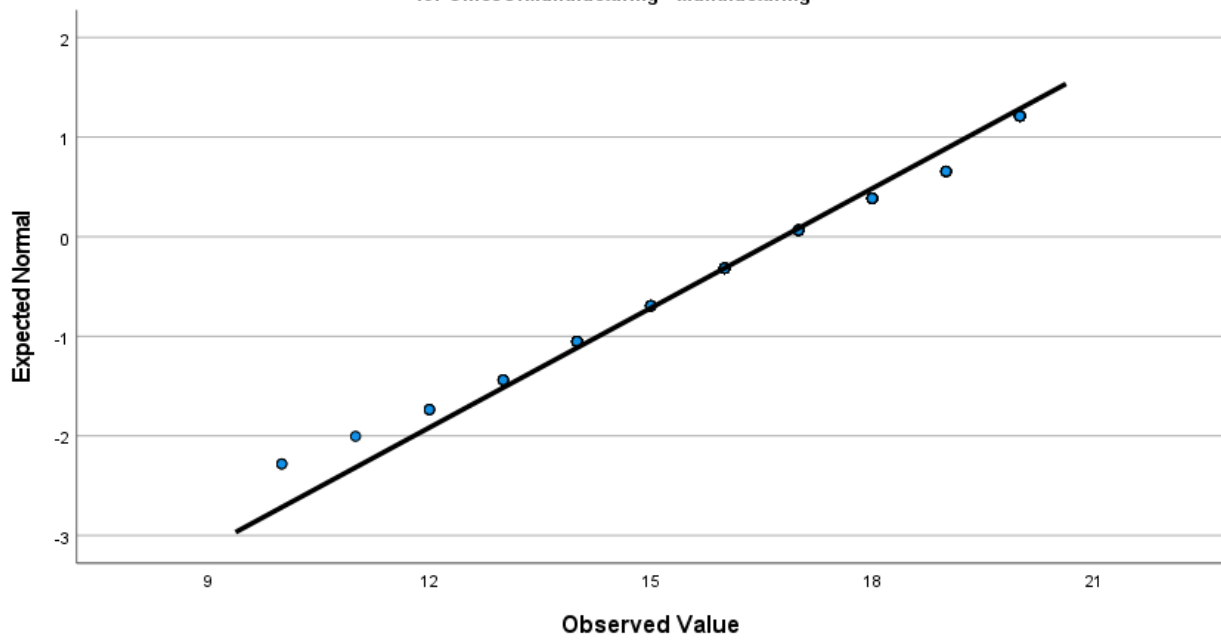

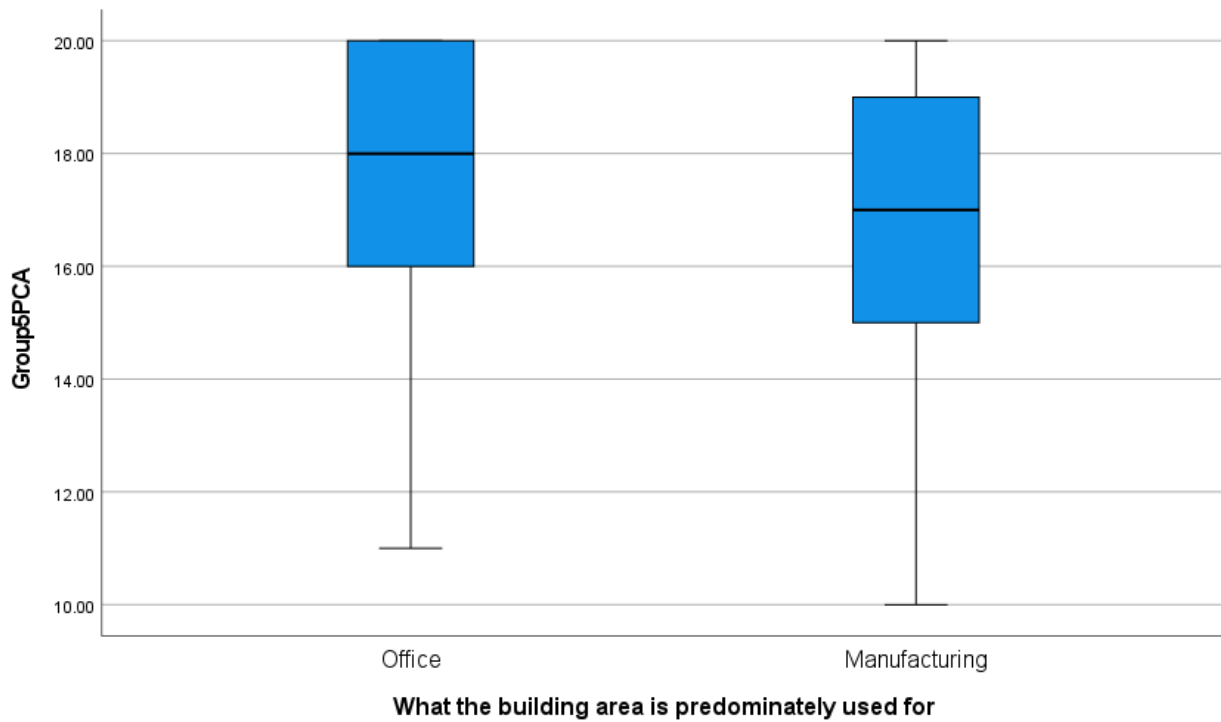

## T-Test

### Group Statistics

| What the building area is predominately used for |               | N   | Mean    | Std. Deviation | Std. Error Mean |
|--------------------------------------------------|---------------|-----|---------|----------------|-----------------|
| Group5PCA                                        | Office        | 118 | 17.4068 | 2.33603        | .21505          |
|                                                  | Manufacturing | 132 | 16.7879 | 2.49895        | .21751          |

### Independent Samples Test

|           |                             | Levene's Test for Equality of Variances |      | t-test for Equality of Means |         |             |             |                 |                       | 95% Confidence Interval of the Difference |         |
|-----------|-----------------------------|-----------------------------------------|------|------------------------------|---------|-------------|-------------|-----------------|-----------------------|-------------------------------------------|---------|
|           |                             | F                                       | Sig. | t                            | df      | One-Sided p | Two-Sided p | Mean Difference | Std. Error Difference | Lower                                     | Upper   |
| Group5PCA | Equal variances assumed     | .207                                    | .650 | 2.016                        | 248     | .022        | .045        | .61890          | .30703                | .01419                                    | 1.22361 |
|           | Equal variances not assumed |                                         |      | 2.023                        | 247.495 | .022        | .044        | .61890          | .30587                | .01647                                    | 1.22134 |

### Independent Samples Effect Sizes

|           |                    | Standardizer <sup>a</sup> | Point Estimate | 95% Confidence Interval |      |
|-----------|--------------------|---------------------------|----------------|-------------------------|------|
| Group5PCA | Cohen's d          | 2.42345                   | .255           | .006                    | .504 |
|           | Hedges' correction | 2.43081                   | .255           | .006                    | .503 |
|           | Glass's delta      | 2.49895                   | .248           | -.003                   | .497 |

a. The denominator used in estimating the effect sizes.

Cohen's d uses the pooled standard deviation.

Hedges' correction uses the pooled standard deviation, plus a correction factor.

Glass's delta uses the sample standard deviation of the control group.

**There are no longer any outliers in the data**

**Shapiro-wilk is significant which suggests data is not normally distributed, confirmed by box and whiskerplots and q-q plots. Not appropriate to undertake independent t-test, explore other options such as mann-whitney test**

## GROUP 6

Descriptives and t-tests as above

What the building area is predominately used for

### Case Processing Summary

| What the building area is predominately used for |               | Valid |         | Cases Missing |         | Total |         |
|--------------------------------------------------|---------------|-------|---------|---------------|---------|-------|---------|
|                                                  |               | N     | Percent | N             | Percent | N     | Percent |
| Group6PCA                                        | Office        | 120   | 100.0%  | 0             | 0.0%    | 120   | 100.0%  |
|                                                  | Manufacturing | 136   | 100.0%  | 0             | 0.0%    | 136   | 100.0%  |

### Descriptives

| What the building area is predominately used for |               | Statistic                        |             | Std. Error |  |
|--------------------------------------------------|---------------|----------------------------------|-------------|------------|--|
|                                                  |               |                                  |             |            |  |
| Group6PCA                                        | Office        | Mean                             | 11.0083     | .19174     |  |
|                                                  |               | 95% Confidence Interval for Mean | Lower Bound | 10.6287    |  |
|                                                  |               |                                  | Upper Bound | 11.3880    |  |
|                                                  |               | 5% Trimmed Mean                  | 11.0833     |            |  |
|                                                  |               | Median                           | 11.0000     |            |  |
|                                                  |               | Variance                         | 4.412       |            |  |
|                                                  |               | Std. Deviation                   | 2.10040     |            |  |
|                                                  |               | Minimum                          | 4.00        |            |  |
|                                                  |               | Maximum                          | 15.00       |            |  |
|                                                  |               | Range                            | 11.00       |            |  |
|                                                  |               | Interquartile Range              | 2.00        |            |  |
|                                                  |               | Skewness                         | -.686       | .221       |  |
|                                                  |               | Kurtosis                         | 1.150       | .438       |  |
|                                                  | Manufacturing | Mean                             | 9.9338      | .20537     |  |
|                                                  |               | 95% Confidence Interval for Mean | Lower Bound | 9.5277     |  |
|                                                  |               |                                  | Upper Bound | 10.3400    |  |
|                                                  |               | 5% Trimmed Mean                  | 9.8873      |            |  |
|                                                  |               | Median                           | 10.0000     |            |  |
|                                                  |               | Variance                         | 5.736       |            |  |
|                                                  |               | Std. Deviation                   | 2.39506     |            |  |
|                                                  |               | Minimum                          | 5.00        |            |  |
|                                                  |               | Maximum                          | 15.00       |            |  |
|                                                  |               | Range                            | 10.00       |            |  |
|                                                  |               | Interquartile Range              | 4.00        |            |  |
|                                                  |               | Skewness                         | .076        | .208       |  |

|  |          |  |       |      |
|--|----------|--|-------|------|
|  | Kurtosis |  | -,535 | ,413 |
|--|----------|--|-------|------|

| Tests of Normality                               |               |                                 |     |       |              |     |       |
|--------------------------------------------------|---------------|---------------------------------|-----|-------|--------------|-----|-------|
| What the building area is predominately used for |               | Kolmogorov-Smirnov <sup>a</sup> |     |       | Shapiro-Wilk |     |       |
|                                                  |               | Statistic                       | df  | Sig.  | Statistic    | df  | Sig.  |
| Group6PCA                                        | Office        | ,177                            | 120 | <,001 | ,920         | 120 | <,001 |
|                                                  | Manufacturing | ,107                            | 136 | <,001 | ,963         | 136 | <,001 |

a. Lilliefors Significance Correction

Group6PCA  
Histograms

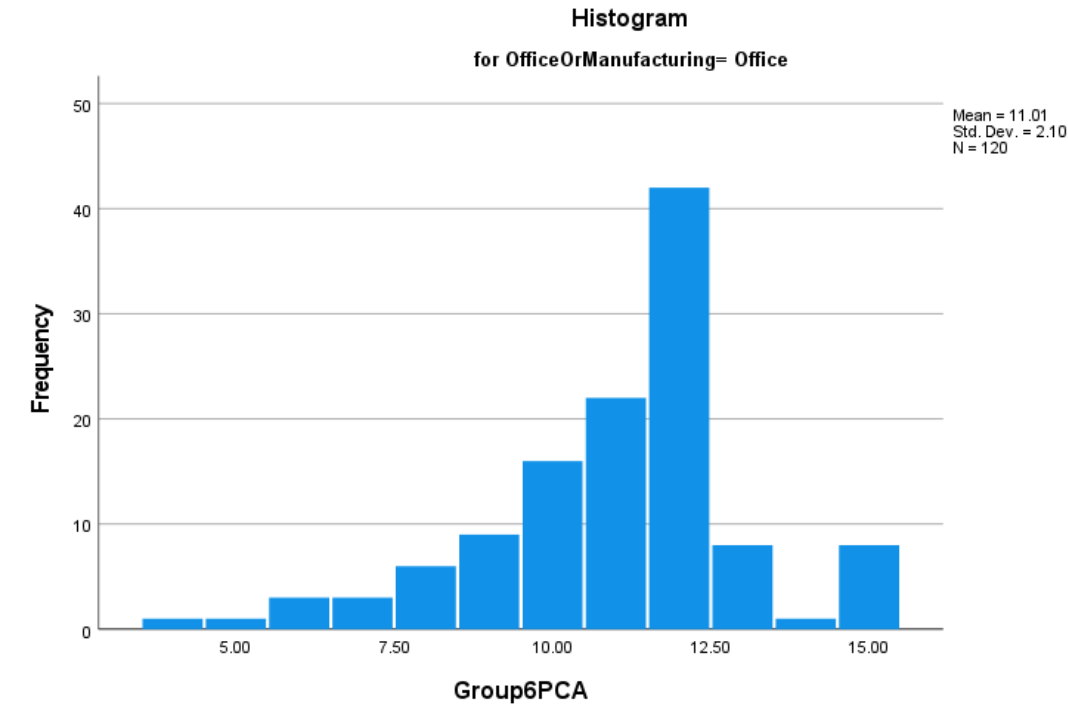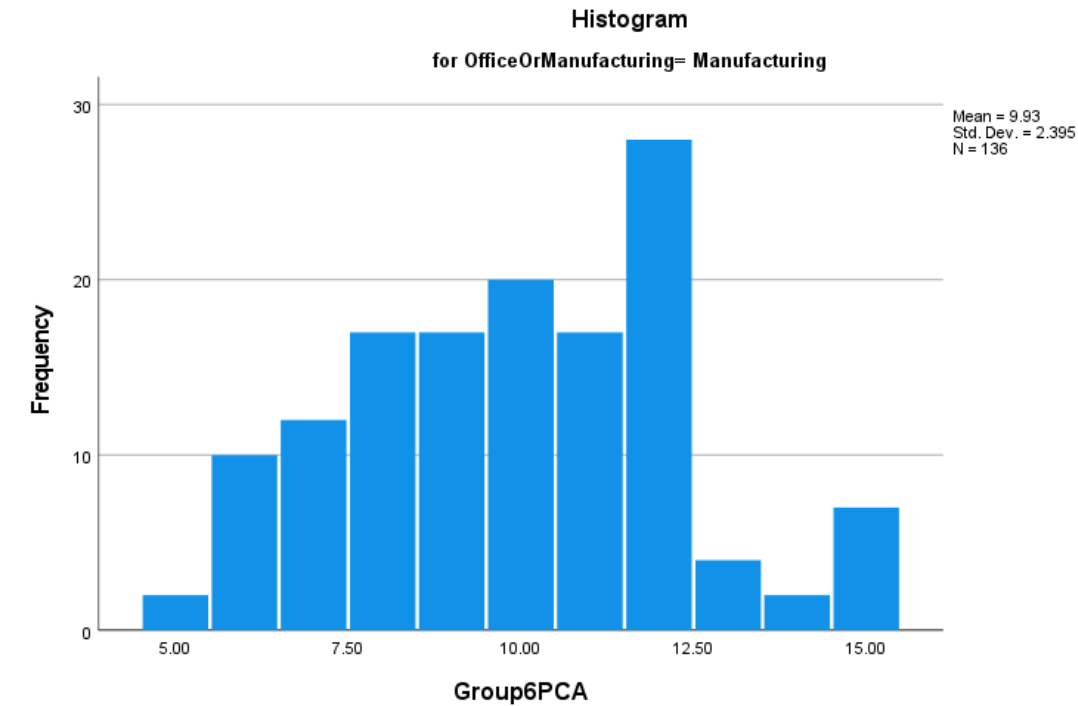



## Normal Q-Q Plots

Normal Q-Q Plot of Group6PCA  
for OfficeOrManufacturing= Office

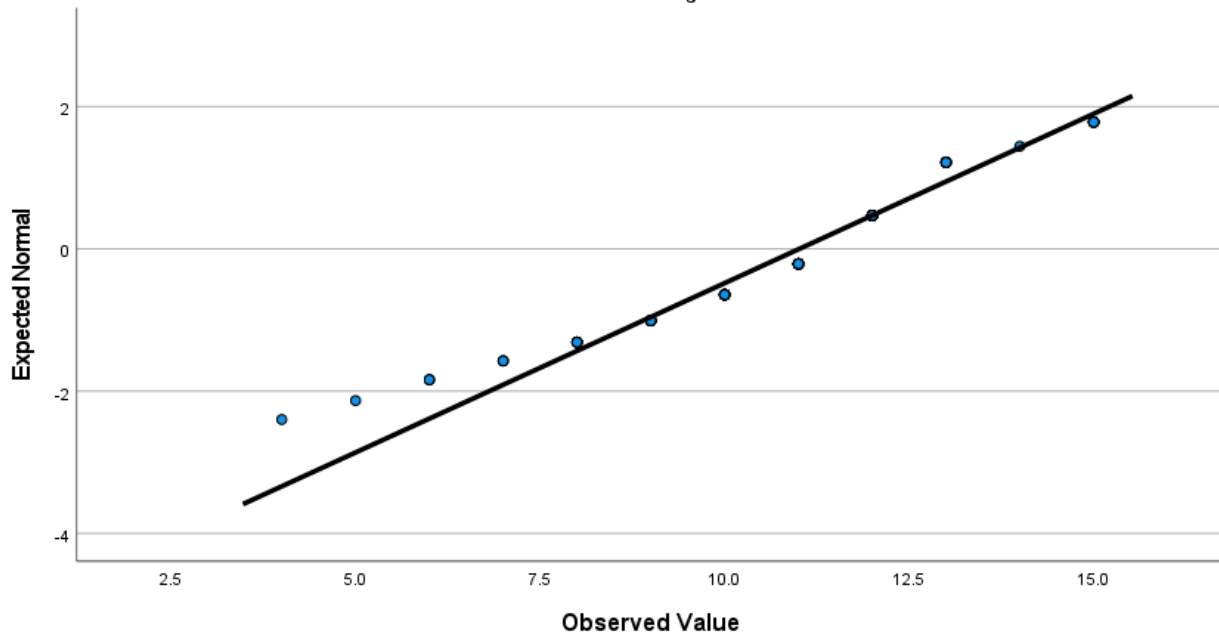

Normal Q-Q Plot of Group6PCA  
for OfficeOrManufacturing= Manufacturing

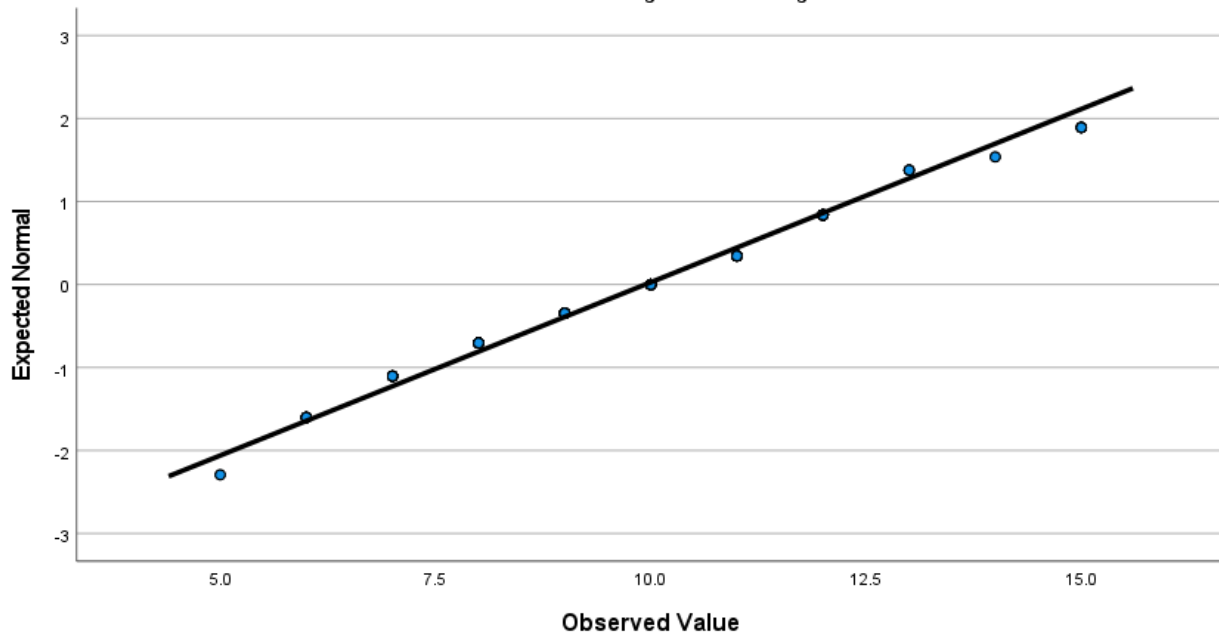

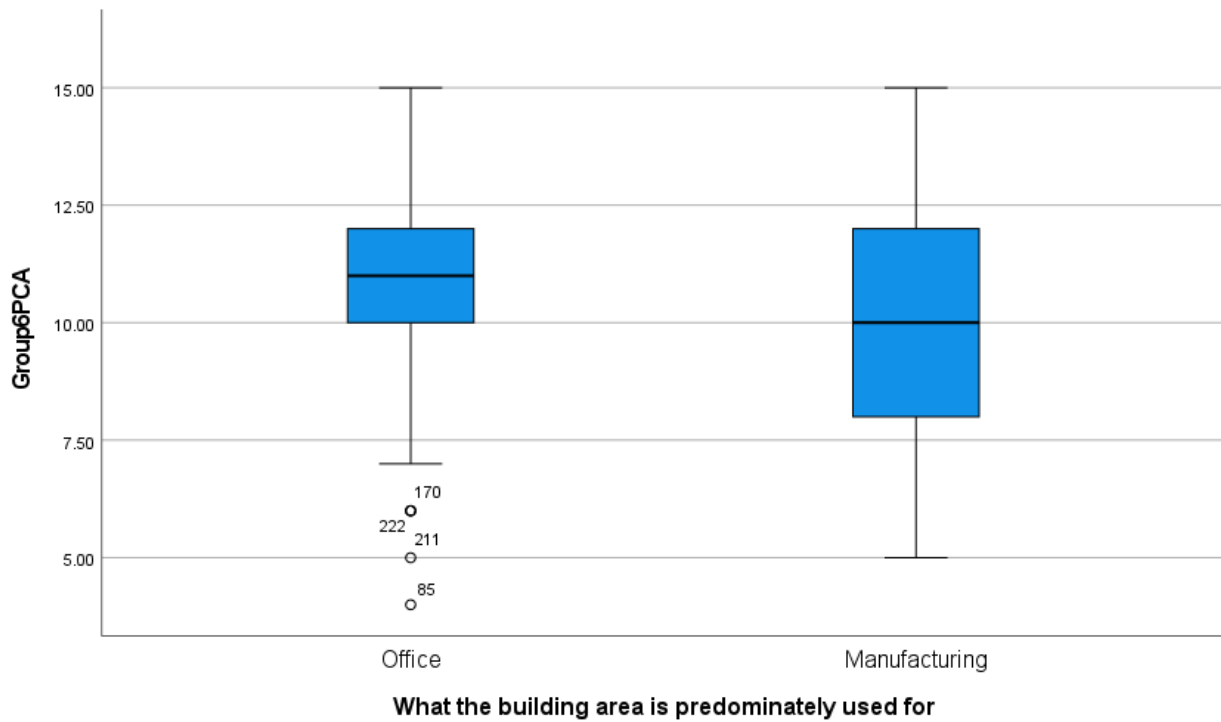

## T-Test

| Group Statistics                                 |               |     |         |                |                 |
|--------------------------------------------------|---------------|-----|---------|----------------|-----------------|
| What the building area is predominately used for |               | N   | Mean    | Std. Deviation | Std. Error Mean |
| Group6PCA                                        | Office        | 120 | 11.0083 | 2.10040        | .19174          |
|                                                  | Manufacturing | 136 | 9.9338  | 2.39506        | .20537          |

| Independent Samples Test                |                             |       |      |                              |         |                          |                          |                 |                       |                                           |         |
|-----------------------------------------|-----------------------------|-------|------|------------------------------|---------|--------------------------|--------------------------|-----------------|-----------------------|-------------------------------------------|---------|
| Levene's Test for Equality of Variances |                             |       |      | t-test for Equality of Means |         |                          |                          |                 |                       |                                           |         |
|                                         |                             | F     | Sig. | t                            | df      | Significance One-Sided p | Significance Two-Sided p | Mean Difference | Std. Error Difference | 95% Confidence Interval of the Difference |         |
| Group6PCA                               | Equal variances assumed     | 5.701 | .018 | 3.793                        | 254     | <.001                    | <.001                    | 1.07451         | .28328                | .51664                                    | 1.63238 |
|                                         | Equal variances not assumed |       |      | 3.824                        | 253.992 | <.001                    | <.001                    | 1.07451         | .28097                | .52119                                    | 1.62783 |

| Independent Samples Effect Sizes |                    |                           |                |                         |      |
|----------------------------------|--------------------|---------------------------|----------------|-------------------------|------|
|                                  |                    | Standardizer <sup>a</sup> | Point Estimate | 95% Confidence Interval |      |
| Group6PCA                        | Cohen's d          | 2.26180                   | .475           | .226                    | .724 |
|                                  | Hedges' correction | 2.26850                   | .474           | .225                    | .721 |

|               |         |      |      |      |
|---------------|---------|------|------|------|
| Glass's delta | 2.39506 | .449 | .197 | .699 |
|---------------|---------|------|------|------|

a. The denominator used in estimating the effect sizes.

Cohen's d uses the pooled standard deviation.

Hedges' correction uses the pooled standard deviation, plus a correction factor.

Glass's delta uses the sample standard deviation of the control group.

**Several outliers found - 222, 211, 170, 85**

**Remove and re-run descriptives and t-test**

**What the building area is predominately used for**

#### Case Processing Summary

| What the building area is predominately used for |               | Valid |         | Missing |         | Total |         |
|--------------------------------------------------|---------------|-------|---------|---------|---------|-------|---------|
|                                                  |               | N     | Percent | N       | Percent | N     | Percent |
| Group6PCA                                        | Office        | 116   | 100.0%  | 0       | 0.0%    | 116   | 100.0%  |
|                                                  | Manufacturing | 136   | 100.0%  | 0       | 0.0%    | 136   | 100.0%  |

#### Descriptives

| What the building area is predominately used for |               | Statistic                        | Std. Error |
|--------------------------------------------------|---------------|----------------------------------|------------|
| Group6PCA                                        | Office        | Mean                             | .16989     |
|                                                  |               | 95% Confidence Interval for Mean |            |
|                                                  |               | Lower Bound                      | 10.8704    |
|                                                  |               | Upper Bound                      | 11.5434    |
|                                                  |               | 5% Trimmed Mean                  | 11.2222    |
|                                                  |               | Median                           | 12.0000    |
|                                                  |               | Variance                         | 3.348      |
|                                                  |               | Std. Deviation                   | 1.82979    |
|                                                  |               | Minimum                          | 6.00       |
|                                                  |               | Maximum                          | 15.00      |
|                                                  |               | Range                            | 9.00       |
|                                                  |               | Interquartile Range              | 2.00       |
|                                                  |               | Skewness                         | -.234      |
|                                                  |               | Kurtosis                         | .494       |
|                                                  | Manufacturing | Mean                             | .20537     |
|                                                  |               | 95% Confidence Interval for Mean |            |
|                                                  |               | Lower Bound                      | 9.5277     |
|                                                  |               | Upper Bound                      | 10.3400    |
|                                                  |               | 5% Trimmed Mean                  | 9.8873     |
|                                                  |               | Median                           | 10.0000    |
|                                                  |               | Variance                         | 5.736      |
|                                                  |               | Std. Deviation                   | 2.39506    |
|                                                  |               | Minimum                          | 5.00       |
|                                                  |               | Maximum                          | 15.00      |
|                                                  |               | Range                            | 10.00      |
|                                                  |               | Interquartile Range              | 4.00       |
|                                                  |               | Skewness                         | .076       |

|          |      |      |
|----------|------|------|
| Kurtosis | -535 | .413 |
|----------|------|------|

| Tests of Normality                               |               |                                 |     |       |              |     |       |
|--------------------------------------------------|---------------|---------------------------------|-----|-------|--------------|-----|-------|
| What the building area is predominately used for |               | Kolmogorov-Smirnov <sup>a</sup> |     |       | Shapiro-Wilk |     |       |
|                                                  |               | Statistic                       | df  | Sig.  | Statistic    | df  | Sig.  |
| Group6PCA                                        | Office        | .186                            | 116 | <.001 | .933         | 116 | <.001 |
|                                                  | Manufacturing | .107                            | 136 | <.001 | .963         | 136 | <.001 |

a. Lilliefors Significance Correction

Group6PCA

Histograms

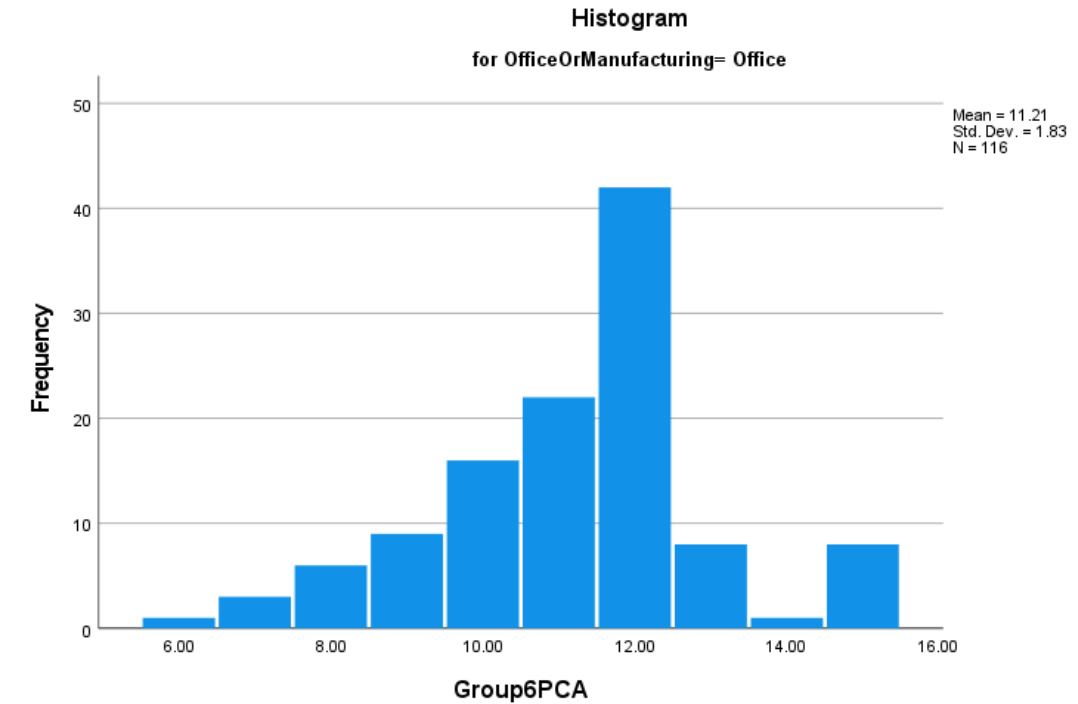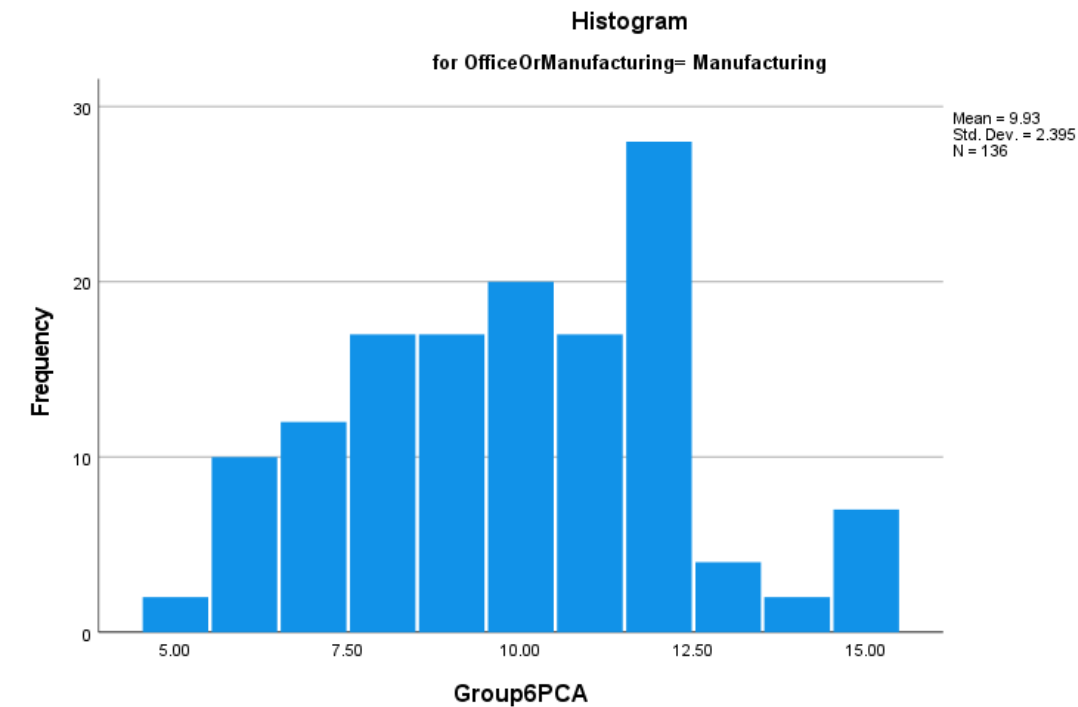

## Normal Q-Q Plots

Normal Q-Q Plot of Group6PCA  
for OfficeOrManufacturing= Office

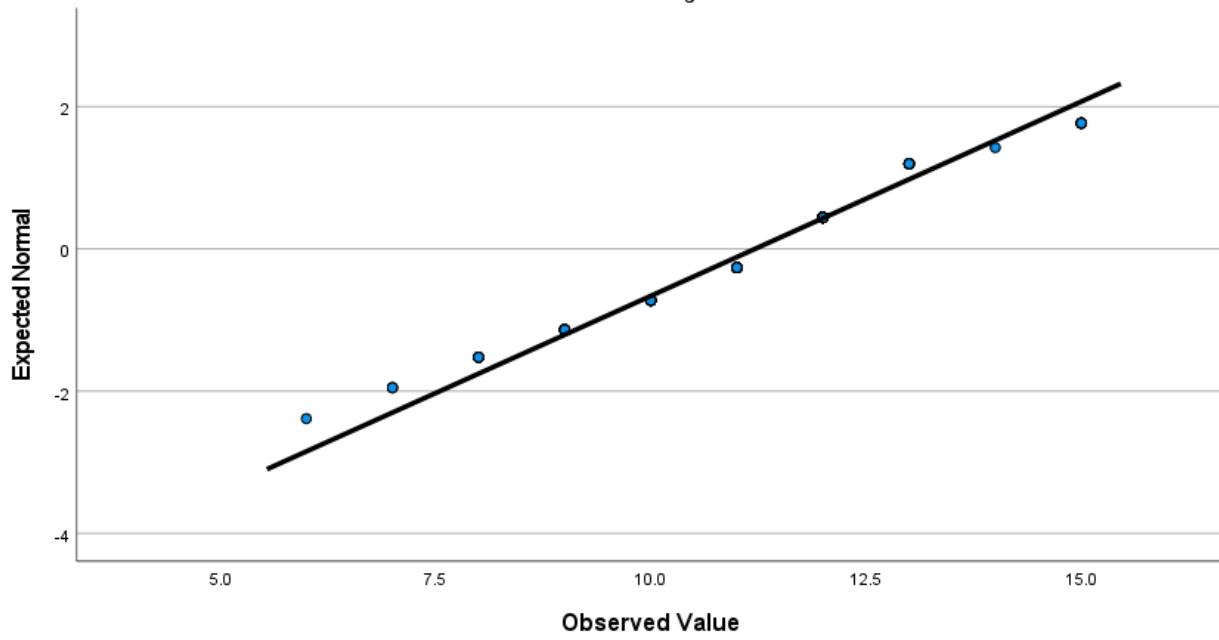

Normal Q-Q Plot of Group6PCA  
for OfficeOrManufacturing= Manufacturing

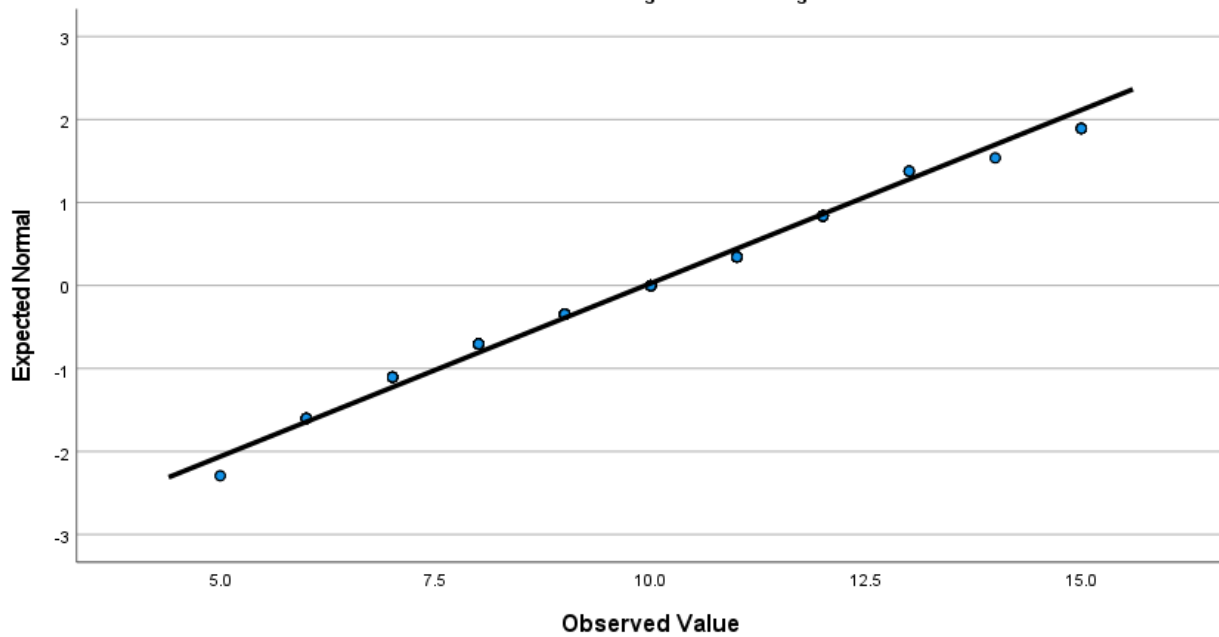

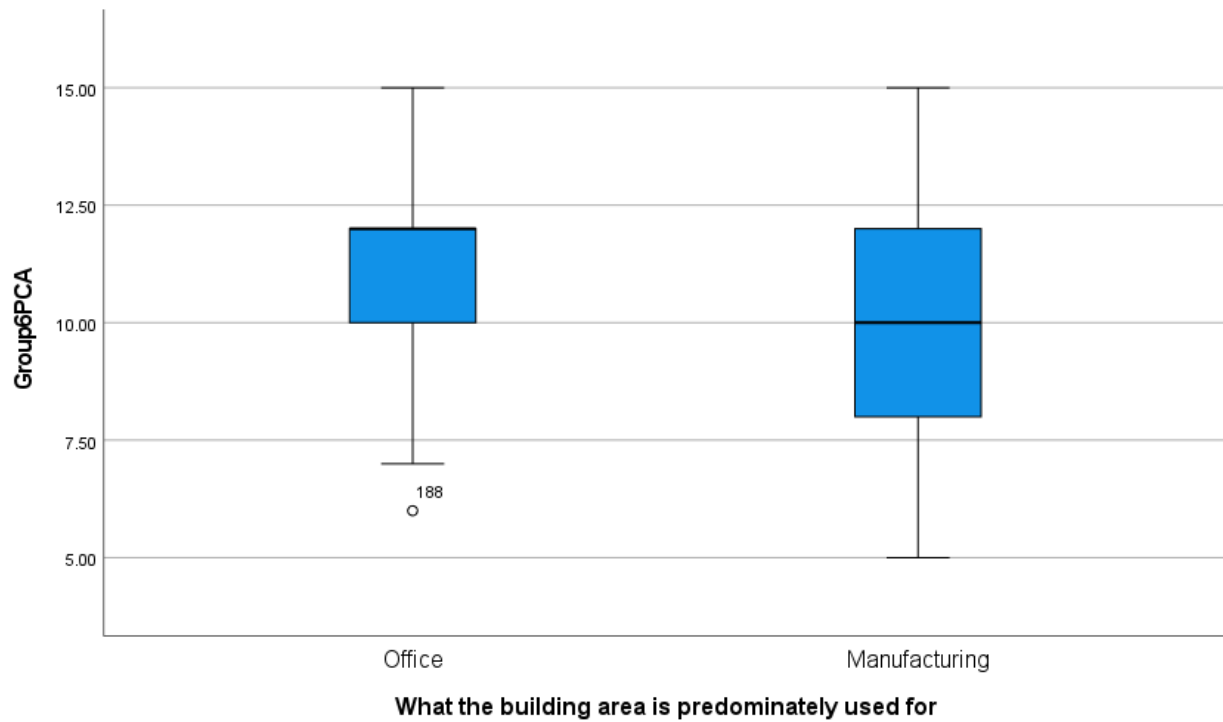

## T-Test

| roup Statistics                                  |               |     |         |                |                 |
|--------------------------------------------------|---------------|-----|---------|----------------|-----------------|
| What the building area is predominately used for |               | N   | Mean    | Std. Deviation | Std. Error Mean |
| Group6PCA                                        | Office        | 116 | 11.2069 | 1.82979        | .16989          |
|                                                  | Manufacturing | 136 | 9.9338  | 2.39506        | .20537          |

| Independent Samples Test |                             |                                         |       |                              |         |              |             |                 |                       |                                           |         |
|--------------------------|-----------------------------|-----------------------------------------|-------|------------------------------|---------|--------------|-------------|-----------------|-----------------------|-------------------------------------------|---------|
|                          |                             | Levene's Test for Equality of Variances |       | t-test for Equality of Means |         |              |             |                 |                       | 95% Confidence Interval of the Difference |         |
|                          |                             | F                                       | Sig.  | t                            | df      | Significance |             | Mean Difference | Std. Error Difference | Lower                                     | Upper   |
|                          |                             |                                         |       |                              |         | One-Sided p  | Two-Sided p |                 |                       |                                           |         |
| Group6PCA                | Equal variances assumed     | 12.114                                  | <.001 | 4.677                        | 250     | <.001        | <.001       | 1.27307         | .27218                | .73702                                    | 1.80913 |
|                          | Equal variances not assumed |                                         |       | 4.776                        | 247.129 | <.001        | <.001       | 1.27307         | .26654                | .74810                                    | 1.79805 |

| Independent Samples Effect Sizes |                    |                           |                |                         |       |
|----------------------------------|--------------------|---------------------------|----------------|-------------------------|-------|
|                                  |                    | Standardizer <sup>a</sup> | Point Estimate | 95% Confidence Interval |       |
|                                  |                    |                           |                | Lower                   | Upper |
| Group6PCA                        | Cohen's d          | 2.15354                   | .591           | .338                    | .844  |
|                                  | Hedges' correction | 2.16003                   | .589           | .337                    | .841  |
|                                  | Glass's delta      | 2.39506                   | .532           | .275                    | .786  |

- a. The denominator used in estimating the effect sizes.
- Cohen's d uses the pooled standard deviation.
- Hedges' correction uses the pooled standard deviation, plus a correction factor.
- Glass's delta uses the sample standard deviation of the control group.

Further outlier identified - 188 removed and re-run descriptives and t-test

What the building area is predominately used for

| Case Processing Summary                          |               |       |         |               |         |       |         |
|--------------------------------------------------|---------------|-------|---------|---------------|---------|-------|---------|
| What the building area is predominately used for |               | Valid |         | Cases Missing |         | Total |         |
|                                                  |               | N     | Percent | N             | Percent | N     | Percent |
| Group6PCA                                        | Office        | 115   | 100.0%  | 0             | 0.0%    | 115   | 100.0%  |
|                                                  | Manufacturing | 136   | 100.0%  | 0             | 0.0%    | 136   | 100.0%  |

| Descriptives                                     |                                  |                                  |             |            |        |
|--------------------------------------------------|----------------------------------|----------------------------------|-------------|------------|--------|
| What the building area is predominately used for |                                  |                                  | Statistic   | Std. Error |        |
| Group6PCA                                        | Office                           | Mean                             |             | 11.2522    | .16518 |
|                                                  |                                  | 95% Confidence Interval for Mean | Lower Bound | 10.9250    |        |
|                                                  |                                  |                                  | Upper Bound | 11.5794    |        |
|                                                  |                                  | 5% Trimmed Mean                  |             | 11.2536    |        |
|                                                  |                                  | Median                           |             | 12.0000    |        |
|                                                  |                                  | Variance                         |             | 3.138      |        |
|                                                  |                                  | Std. Deviation                   |             | 1.77133    |        |
|                                                  |                                  | Minimum                          |             | 7.00       |        |
|                                                  |                                  | Maximum                          |             | 15.00      |        |
|                                                  |                                  | Range                            |             | 8.00       |        |
|                                                  |                                  | Interquartile Range              |             | 2.00       |        |
|                                                  |                                  | Skewness                         |             | -.112      | .226   |
|                                                  |                                  | Kurtosis                         |             | .344       | .447   |
|                                                  |                                  | Manufacturing                    | Mean        |            | 9.9338 |
|                                                  | 95% Confidence Interval for Mean |                                  | Lower Bound | 9.5277     |        |
|                                                  |                                  |                                  | Upper Bound | 10.3400    |        |
|                                                  | 5% Trimmed Mean                  |                                  |             | 9.8873     |        |
|                                                  | Median                           |                                  |             | 10.0000    |        |
|                                                  | Variance                         |                                  |             | 5.736      |        |
|                                                  | Std. Deviation                   |                                  |             | 2.39506    |        |
|                                                  | Minimum                          |                                  |             | 5.00       |        |
|                                                  | Maximum                          |                                  |             | 15.00      |        |
|                                                  | Range                            |                                  |             | 10.00      |        |
|                                                  | Interquartile Range              |                                  |             | 4.00       |        |
|                                                  | Skewness                         |                                  |             | .076       | .208   |
|                                                  | Kurtosis                         |                                  | -.535       | .413       |        |

|                                                  |               | Tests of Normality              |     |       |              |     |       |
|--------------------------------------------------|---------------|---------------------------------|-----|-------|--------------|-----|-------|
| What the building area is predominately used for |               | Kolmogorov-Smirnov <sup>a</sup> |     |       | Shapiro-Wilk |     |       |
|                                                  |               | Statistic                       | df  | Sig.  | Statistic    | df  | Sig.  |
| Group6PCA                                        | Office        | .189                            | 115 | <.001 | .931         | 115 | <.001 |
|                                                  | Manufacturing | .107                            | 136 | <.001 | .963         | 136 | <.001 |

a. Lilliefors Significance Correction

Group6PCA

Histograms

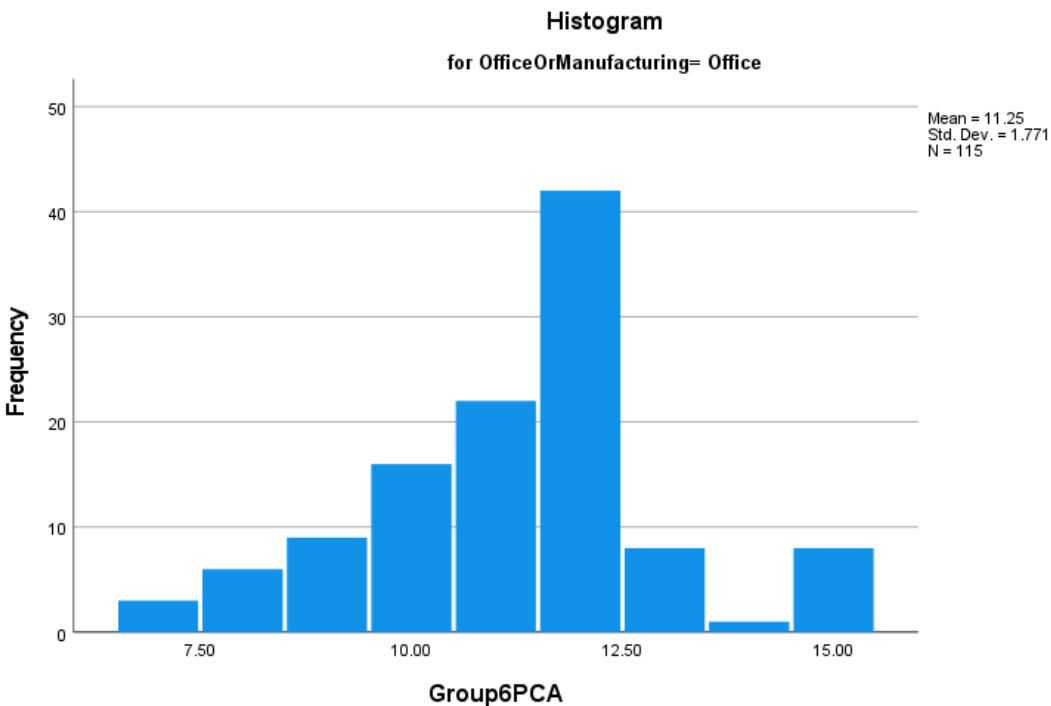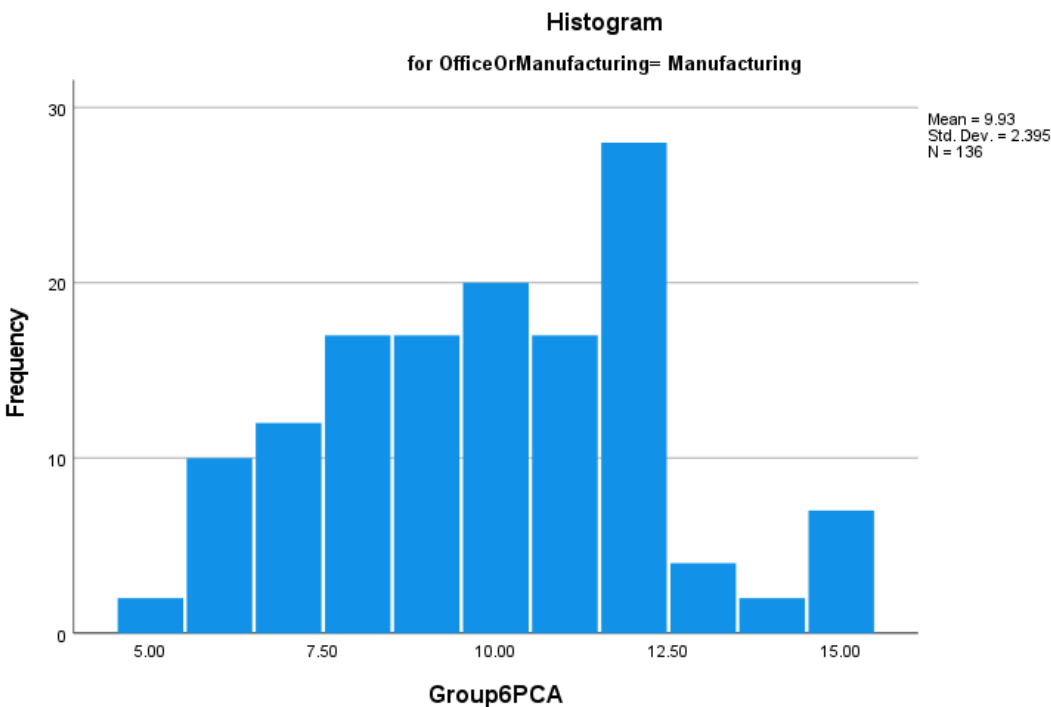



## Normal Q-Q Plots

Normal Q-Q Plot of Group6PCA  
for OfficeOrManufacturing= Office

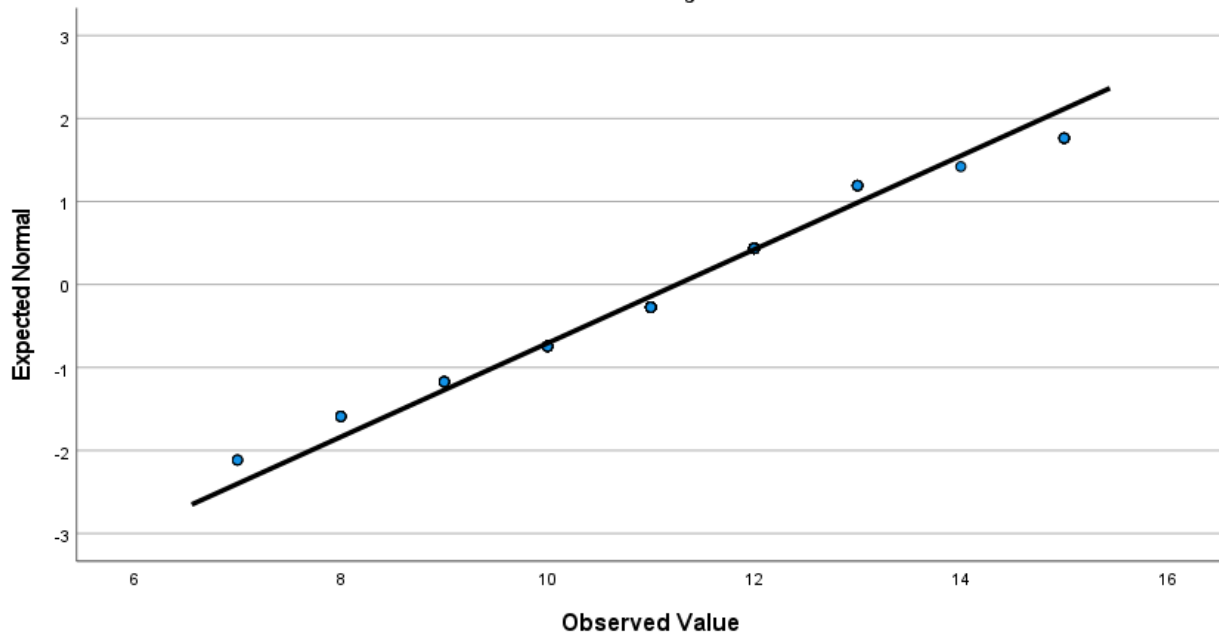

Normal Q-Q Plot of Group6PCA  
for OfficeOrManufacturing= Manufacturing

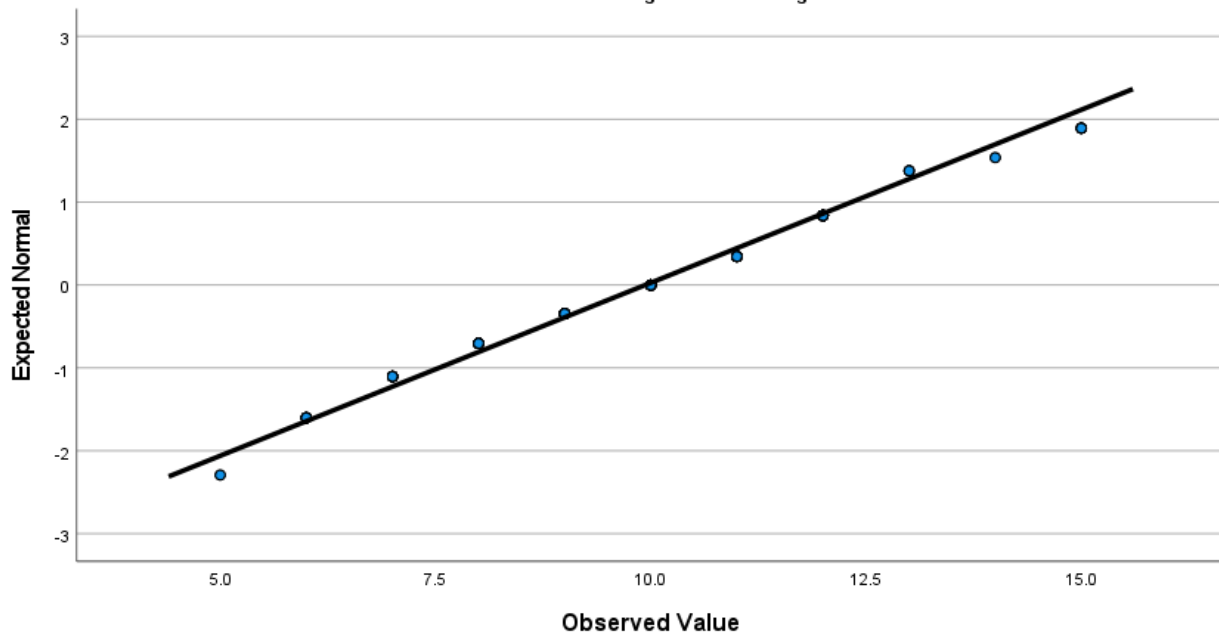

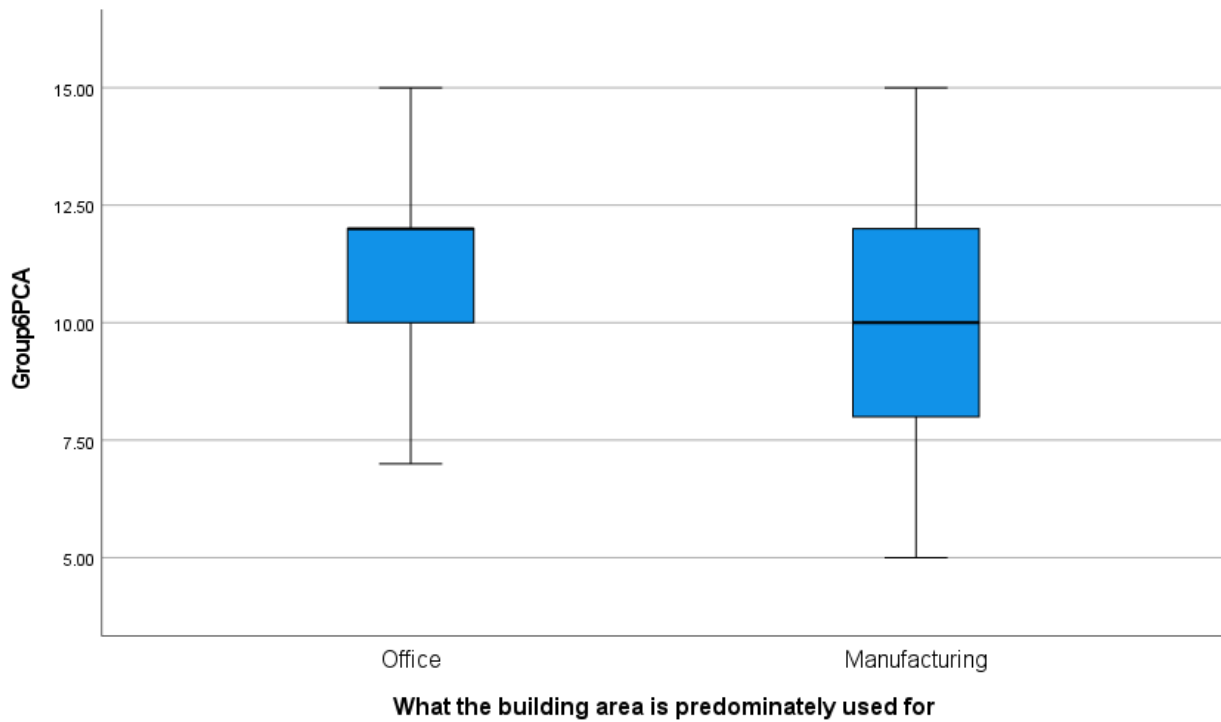

## T-Test

| Group Statistics                                 |               |     |         |                |                 |
|--------------------------------------------------|---------------|-----|---------|----------------|-----------------|
| What the building area is predominately used for |               | N   | Mean    | Std. Deviation | Std. Error Mean |
| Group6PCA                                        | Office        | 115 | 11.2522 | 1.77133        | .16518          |
|                                                  | Manufacturing | 136 | 9.9338  | 2.39506        | .20537          |

| Independent Samples Test                |                             |        |       |                              |         |             |             |                 |                       |        |                                           |
|-----------------------------------------|-----------------------------|--------|-------|------------------------------|---------|-------------|-------------|-----------------|-----------------------|--------|-------------------------------------------|
| Levene's Test for Equality of Variances |                             |        |       | t-test for Equality of Means |         |             |             |                 |                       |        | 95% Confidence Interval of the Difference |
|                                         |                             | F      | Sig.  | t                            | df      | One-Sided p | Two-Sided p | Mean Difference | Std. Error Difference | Lower  | Upper                                     |
| Group6PCA                               | Equal variances assumed     | 14.006 | <.001 | 4.881                        | 249     | <.001       | <.001       | 1.31835         | .27012                | .78634 | 1.85037                                   |
|                                         | Equal variances not assumed |        |       | 5.002                        | 244.826 | <.001       | <.001       | 1.31835         | .26356                | .79922 | 1.83748                                   |

| Independent Samples Effect Sizes |                    |                           |                |                         |      |
|----------------------------------|--------------------|---------------------------|----------------|-------------------------|------|
|                                  |                    | Standardizer <sup>a</sup> | Point Estimate | 95% Confidence Interval |      |
| Group6PCA                        | Cohen's d          | 2.13226                   | .618           | .364                    | .872 |
|                                  | Hedges' correction | 2.13871                   | .616           | .362                    | .869 |
|                                  | Glass's delta      | 2.39506                   | .550           | .293                    | .806 |

a. The denominator used in estimating the effect sizes.

Cohen's d uses the pooled standard deviation.

Hedges' correction uses the pooled standard deviation, plus a correction factor.

Glass's delta uses the sample standard deviation of the control group.

**There are no longer any outliers in the data**

**Shapiro-wilk is significant which suggests data is not normally distributed, confirmed by box and whiskerplots and q-q plots.**

**Not appropriate to undertake independent t-test, explore other options such as mann-whitney test**

GROUP 7

**what the building area is predominately used for**

#### Case Processing Summary

| What the building area is predominately used for |               | Valid |         | Missing |         | Total |         |
|--------------------------------------------------|---------------|-------|---------|---------|---------|-------|---------|
|                                                  |               | N     | Percent | N       | Percent | N     | Percent |
| Group7PCA                                        | Office        | 120   | 100.0%  | 0       | 0.0%    | 120   | 100.0%  |
|                                                  | Manufacturing | 136   | 100.0%  | 0       | 0.0%    | 136   | 100.0%  |

#### Descriptives

| What the building area is predominately used for |               |                                  | Statistic | Std. Error |
|--------------------------------------------------|---------------|----------------------------------|-----------|------------|
| Group7PCA                                        | Office        | Mean                             | 11.8833   | .24801     |
|                                                  |               | 95% Confidence Interval for Mean |           |            |
|                                                  |               | Lower Bound                      | 11.3922   |            |
|                                                  |               | Upper Bound                      | 12.3744   |            |
|                                                  |               | 5% Trimmed Mean                  | 11.8611   |            |
|                                                  |               | Median                           | 12.0000   |            |
|                                                  |               | Variance                         | 7.381     |            |
|                                                  |               | Std. Deviation                   | 2.71684   |            |
|                                                  |               | Minimum                          | 5.00      |            |
|                                                  |               | Maximum                          | 18.00     |            |
|                                                  |               | Range                            | 13.00     |            |
|                                                  |               | Interquartile Range              | 4.00      |            |
|                                                  |               | Skewness                         | .036      | .221       |
|                                                  |               | Kurtosis                         | -.687     | .438       |
|                                                  | Manufacturing | Mean                             | 10.1544   | .21615     |
|                                                  |               | 95% Confidence Interval for Mean |           |            |
|                                                  |               | Lower Bound                      | 9.7269    |            |
|                                                  |               | Upper Bound                      | 10.5819   |            |
|                                                  |               | 5% Trimmed Mean                  | 10.1634   |            |
|                                                  |               | Median                           | 10.0000   |            |
|                                                  |               | Variance                         | 6.354     |            |
|                                                  |               | Std. Deviation                   | 2.52067   |            |
|                                                  |               | Minimum                          | 4.00      |            |
|                                                  |               | Maximum                          | 17.00     |            |
|                                                  |               | Range                            | 13.00     |            |
|                                                  |               | Interquartile Range              | 3.00      |            |
|                                                  |               | Skewness                         | -.008     | .208       |
|                                                  |               | Kurtosis                         | -.282     | .413       |

|                                                  |               | Tests of Normality              |     |       |              |     |      |
|--------------------------------------------------|---------------|---------------------------------|-----|-------|--------------|-----|------|
| What the building area is predominately used for |               | Kolmogorov-Smirnov <sup>a</sup> |     |       | Shapiro-Wilk |     |      |
|                                                  |               | Statistic                       | df  | Sig.  | Statistic    | df  | Sig. |
| Group7PCA                                        | Office        | .115                            | 120 | <.001 | .972         | 120 | .012 |
|                                                  | Manufacturing | .105                            | 136 | <.001 | .980         | 136 | .047 |

a. Lilliefors Significance Correction

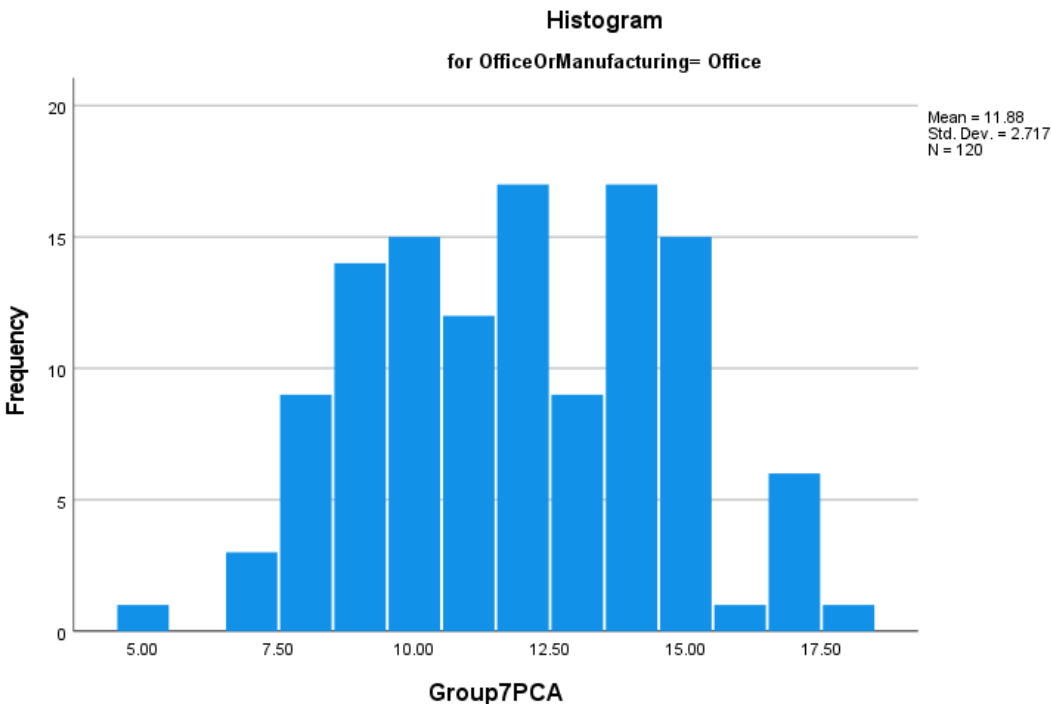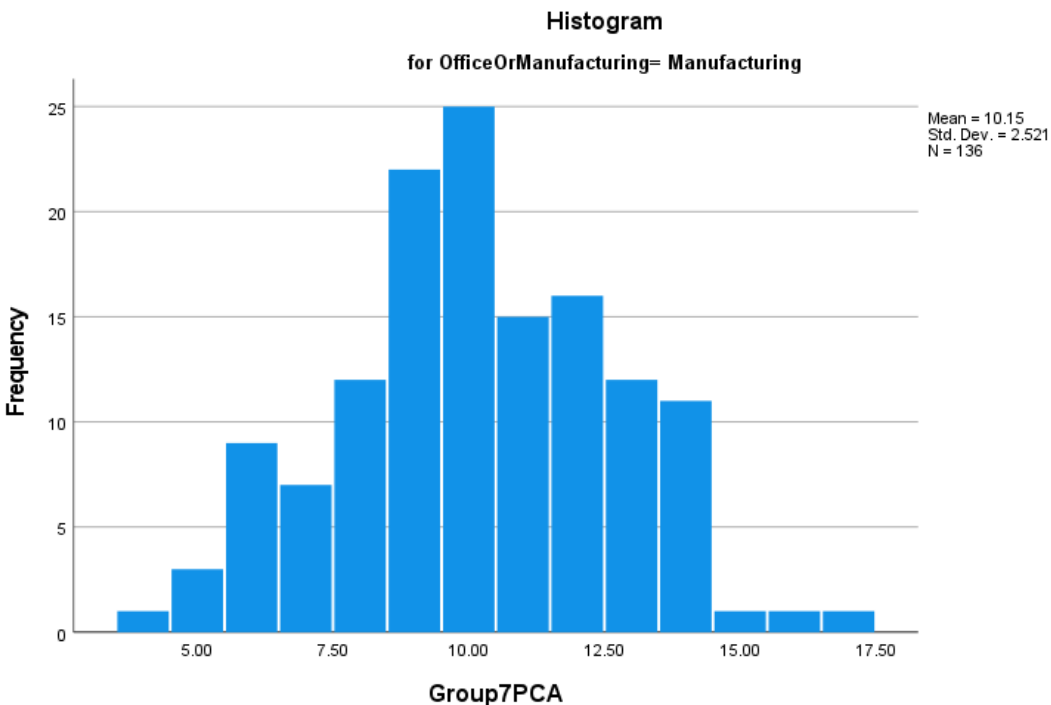

Normal Q-Q Plots

Normal Q-Q Plot of Group7PCA

for OfficeOrManufacturing= Office

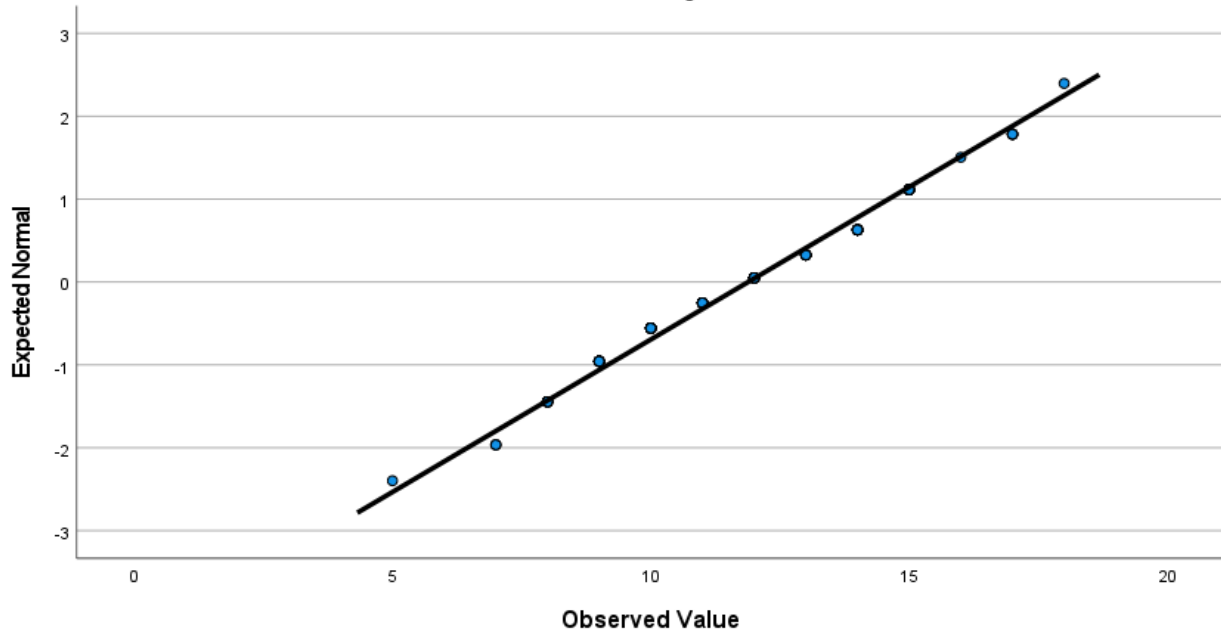

Normal Q-Q Plot of Group7PCA

for OfficeOrManufacturing= Manufacturing

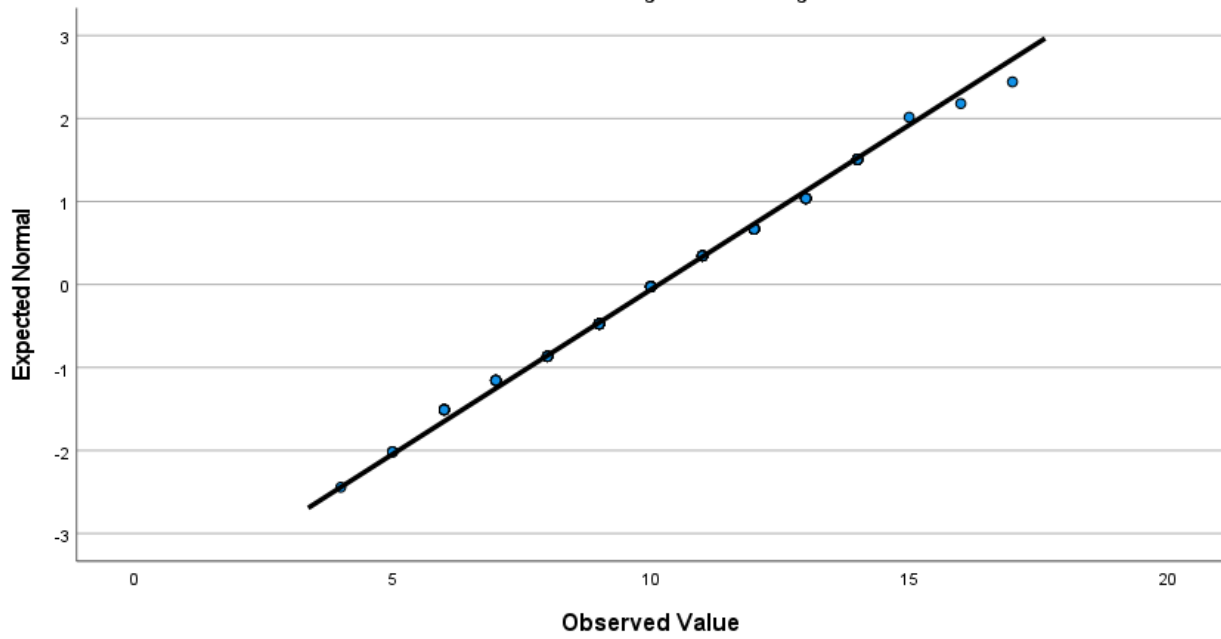

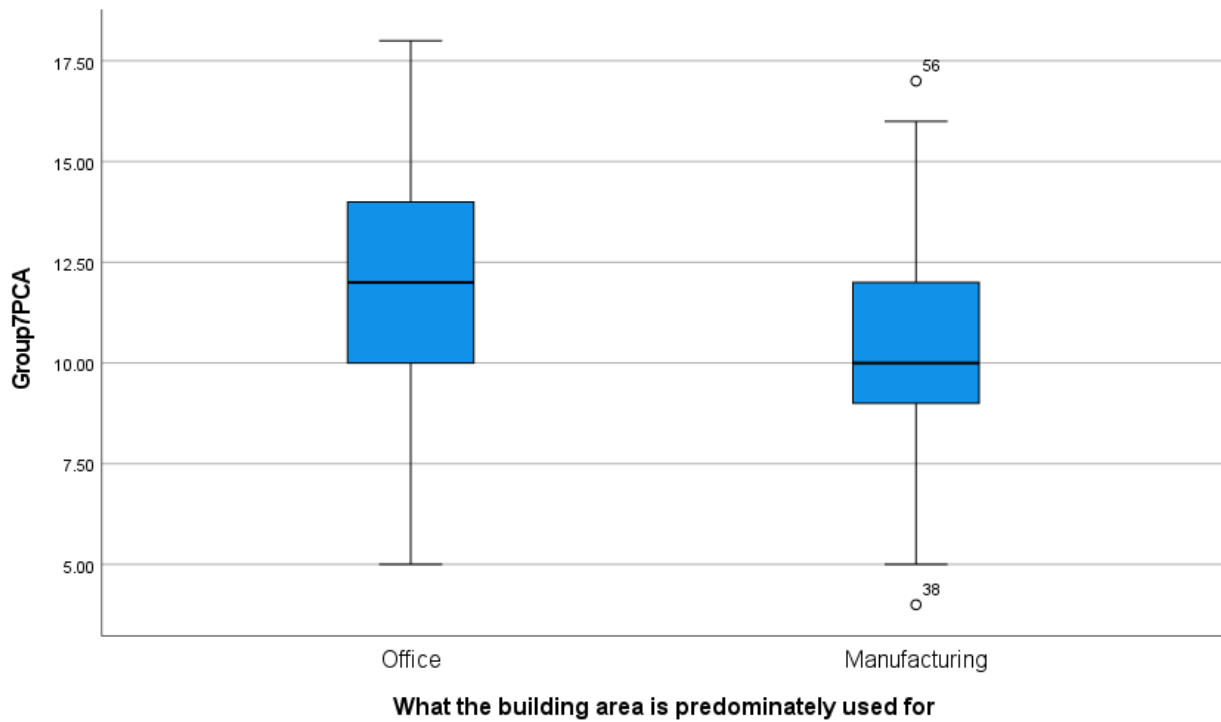

| Group Statistics                                 |               |     |         |                |                 |
|--------------------------------------------------|---------------|-----|---------|----------------|-----------------|
| What the building area is predominately used for |               | N   | Mean    | Std. Deviation | Std. Error Mean |
| Group7PCA                                        | Office        | 120 | 11.8833 | 2.71684        | .24801          |
|                                                  | Manufacturing | 136 | 10.1544 | 2.52067        | .21615          |

| Independent Samples Test                |                             |       |      |                              |         |              |             |                 |                       |                                           |         |
|-----------------------------------------|-----------------------------|-------|------|------------------------------|---------|--------------|-------------|-----------------|-----------------------|-------------------------------------------|---------|
| Levene's Test for Equality of Variances |                             |       |      | t-test for Equality of Means |         |              |             |                 |                       |                                           |         |
|                                         |                             |       |      |                              |         | Significance |             |                 |                       | 95% Confidence Interval of the Difference |         |
|                                         |                             | F     | Sig. | t                            | df      | One-Sided p  | Two-Sided p | Mean Difference | Std. Error Difference | Lower                                     | Upper   |
| Group7PCA                               | Equal variances assumed     | 1.880 | .172 | 5.280                        | 254     | <.001        | <.001       | 1.72892         | .32744                | 1.08408                                   | 2.37377 |
|                                         | Equal variances not assumed |       |      | 5.255                        | 244.225 | <.001        | <.001       | 1.72892         | .32898                | 1.08092                                   | 2.37693 |

| Independent Samples Effect Sizes |                    |                           |                |                         |       |
|----------------------------------|--------------------|---------------------------|----------------|-------------------------|-------|
|                                  |                    | Standardizer <sup>a</sup> | Point Estimate | 95% Confidence Interval |       |
|                                  |                    |                           |                | Lower                   | Upper |
| Group7PCA                        | Cohen's d          | 2.61441                   | .661           | .409                    | .913  |
|                                  | Hedges' correction | 2.62216                   | .659           | .407                    | .910  |
|                                  | Glass's delta      | 2.52067                   | .686           | .426                    | .943  |

- a. The denominator used in estimating the effect sizes.
- Cohen's d uses the pooled standard deviation.
- Hedges' correction uses the pooled standard deviation, plus a correction factor.
- Glass's delta uses the sample standard deviation of the control group.

The above identifies 38 and 56 as outliers. Remove these and re-run test

What the building area is predominately used for

| Case Processing Summary                          |               |       |         |               |         |       |         |
|--------------------------------------------------|---------------|-------|---------|---------------|---------|-------|---------|
| What the building area is predominately used for |               | Valid |         | Cases Missing |         | Total |         |
|                                                  |               | N     | Percent | N             | Percent | N     | Percent |
| Group7PCA                                        | Office        | 120   | 100.0%  | 0             | 0.0%    | 120   | 100.0%  |
|                                                  | Manufacturing | 134   | 100.0%  | 0             | 0.0%    | 134   | 100.0%  |

| Descriptives                                     |               |                                  |             |            |
|--------------------------------------------------|---------------|----------------------------------|-------------|------------|
| What the building area is predominately used for |               |                                  | Statistic   | Std. Error |
| Group7PCA                                        | Office        | Mean                             | 11.8833     | .24801     |
|                                                  |               | 95% Confidence Interval for Mean | Lower Bound | 11.3922    |
|                                                  |               |                                  | Upper Bound | 12.3744    |
|                                                  |               | 5% Trimmed Mean                  | 11.8611     |            |
|                                                  |               | Median                           | 12.0000     |            |
|                                                  |               | Variance                         | 7.381       |            |
|                                                  |               | Std. Deviation                   | 2.71684     |            |
|                                                  |               | Minimum                          | 5.00        |            |
|                                                  |               | Maximum                          | 18.00       |            |
|                                                  |               | Range                            | 13.00       |            |
|                                                  |               | Interquartile Range              | 4.00        |            |
|                                                  |               | Skewness                         | .036        | .221       |
|                                                  |               | Kurtosis                         | -.687       | .438       |
|                                                  | Manufacturing | Mean                             | 10.1493     | .20826     |
|                                                  |               | 95% Confidence Interval for Mean | Lower Bound | 9.7373     |
|                                                  |               |                                  | Upper Bound | 10.5612    |
|                                                  |               | 5% Trimmed Mean                  | 10.1658     |            |
|                                                  |               | Median                           | 10.0000     |            |
|                                                  |               | Variance                         | 5.812       |            |
|                                                  |               | Std. Deviation                   | 2.41084     |            |
|                                                  |               | Minimum                          | 5.00        |            |
|                                                  |               | Maximum                          | 16.00       |            |
|                                                  |               | Range                            | 11.00       |            |
|                                                  |               | Interquartile Range              | 3.00        |            |
|                                                  |               | Skewness                         | -.050       | .209       |
|                                                  |               | Kurtosis                         | -.533       | .416       |

|                                                  |               | Tests of Normality              |     |       |              |     |      |
|--------------------------------------------------|---------------|---------------------------------|-----|-------|--------------|-----|------|
| What the building area is predominately used for |               | Kolmogorov-Smirnov <sup>a</sup> |     |       | Shapiro-Wilk |     |      |
|                                                  |               | Statistic                       | df  | Sig.  | Statistic    | df  | Sig. |
| Group7PCA                                        | Office        | .115                            | 120 | <.001 | .972         | 120 | .012 |
|                                                  | Manufacturing | .107                            | 134 | <.001 | .974         | 134 | .010 |

a. Lilliefors Significance Correction

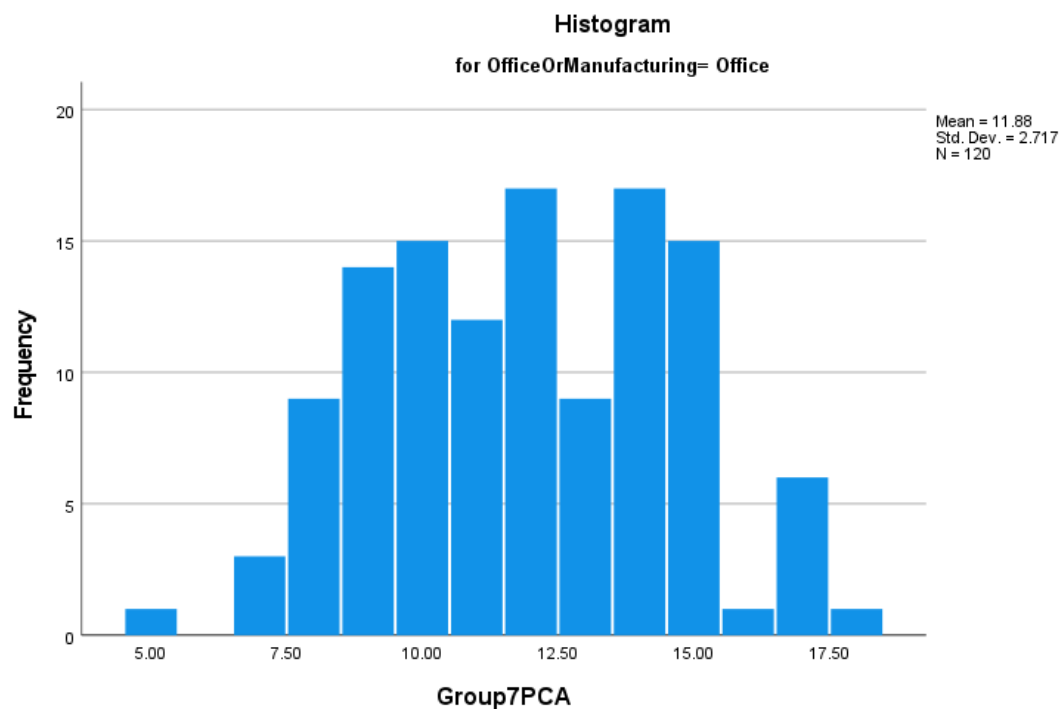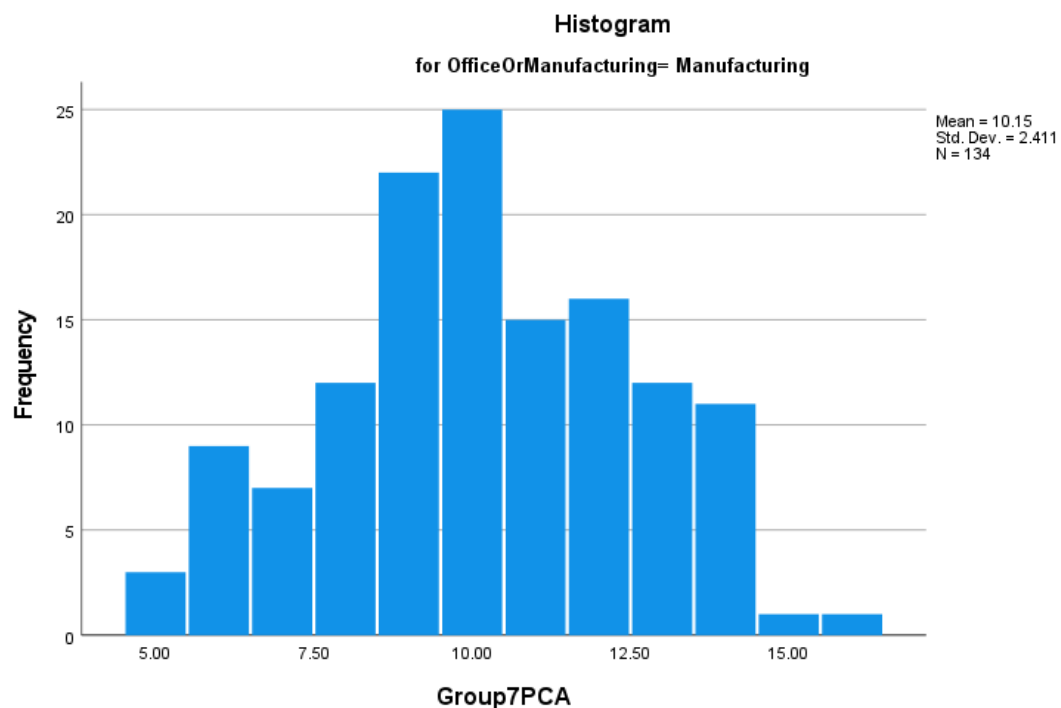

Normal Q-Q Plots



Normal Q-Q Plot of Group7PCA

for OfficeOrManufacturing= Office



Normal Q-Q Plot of Group7PCA

for OfficeOrManufacturing= Manufacturing

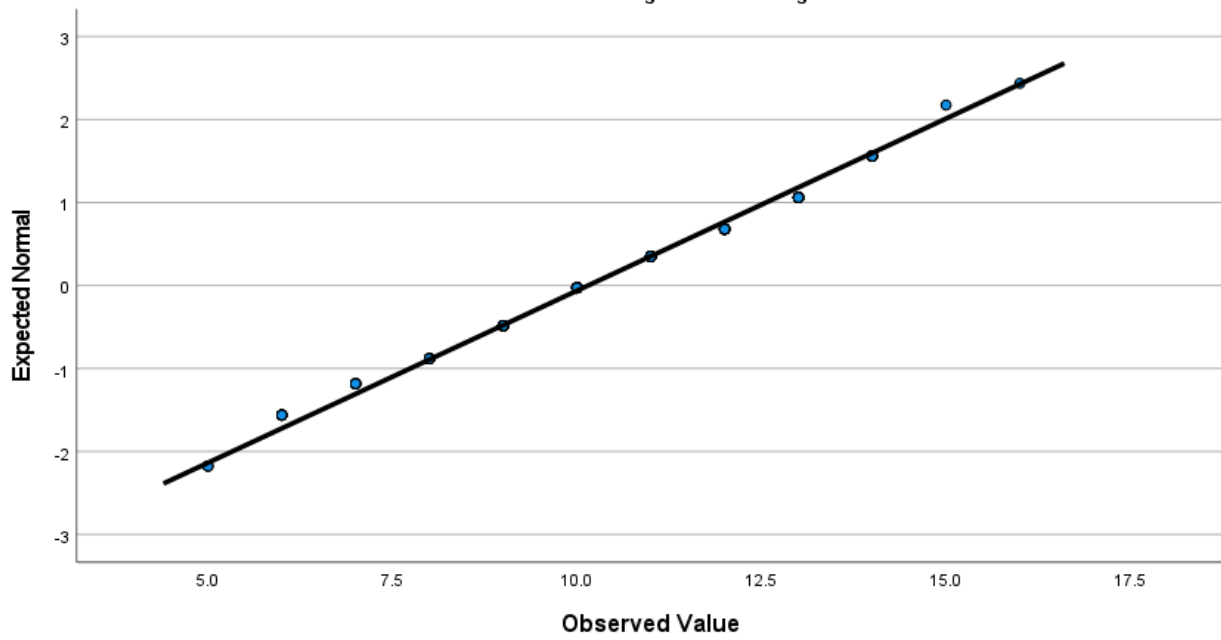

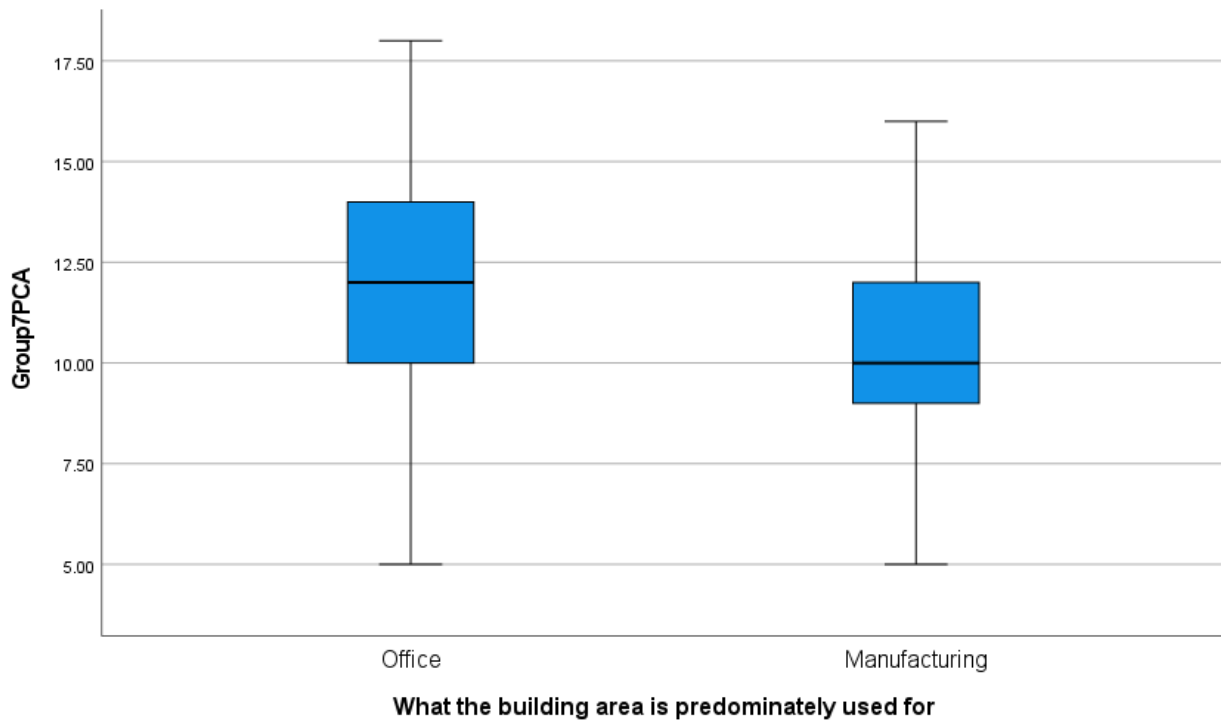

## T-Test

| Group Statistics                                 |               |     |         |                |                 |
|--------------------------------------------------|---------------|-----|---------|----------------|-----------------|
| What the building area is predominately used for |               | N   | Mean    | Std. Deviation | Std. Error Mean |
| Group7PCA                                        | Office        | 120 | 11.8833 | 2.71684        | .24801          |
|                                                  | Manufacturing | 134 | 10.1493 | 2.41084        | .20826          |

| Independent Samples Test                |                             |       |      |                              |         |              |             |                 |                       |                                           |         |
|-----------------------------------------|-----------------------------|-------|------|------------------------------|---------|--------------|-------------|-----------------|-----------------------|-------------------------------------------|---------|
| Levene's Test for Equality of Variances |                             |       |      | t-test for Equality of Means |         |              |             |                 |                       |                                           |         |
|                                         |                             |       |      |                              |         | Significance |             |                 |                       | 95% Confidence Interval of the Difference |         |
|                                         |                             | F     | Sig. | t                            | df      | One-Sided p  | Two-Sided p | Mean Difference | Std. Error Difference | Lower                                     | Upper   |
| Group7PCA                               | Equal variances assumed     | 3.178 | .076 | 5.390                        | 252     | <.001        | <.001       | 1.73408         | .32173                | 1.10045                                   | 2.36771 |
|                                         | Equal variances not assumed |       |      | 5.354                        | 239.462 | <.001        | <.001       | 1.73408         | .32386                | 1.09610                                   | 2.37206 |

| Independent Samples Effect Sizes |                    |                           |                |                         |      |
|----------------------------------|--------------------|---------------------------|----------------|-------------------------|------|
|                                  |                    | Standardizer <sup>a</sup> | Point Estimate | 95% Confidence Interval |      |
| Group7PCA                        | Cohen's d          | 2.55990                   | .677           | .423                    | .930 |
|                                  | Hedges' correction | 2.56755                   | .675           | .422                    | .927 |

|               |         |      |      |      |
|---------------|---------|------|------|------|
| Glass's delta | 2.41084 | .719 | .457 | .979 |
|---------------|---------|------|------|------|

a. The denominator used in estimating the effect sizes.

Cohen's d uses the pooled standard deviation.

Hedges' correction uses the pooled standard deviation, plus a correction factor.

Glass's delta uses the sample standard deviation of the control group.

## group 8

What the building area is predominately used for

### Case Processing Summary

| What the building area is predominately used for |               | Valid |         | Cases Missing |         | Total |         |
|--------------------------------------------------|---------------|-------|---------|---------------|---------|-------|---------|
|                                                  |               | N     | Percent | N             | Percent | N     | Percent |
| Group8PCA                                        | Office        | 120   | 100.0%  | 0             | 0.0%    | 120   | 100.0%  |
|                                                  | Manufacturing | 136   | 100.0%  | 0             | 0.0%    | 136   | 100.0%  |

### Descriptives

| What the building area is predominately used for |               | Statistic                        |             | Std. Error |
|--------------------------------------------------|---------------|----------------------------------|-------------|------------|
| Group8PCA                                        | Office        | Mean                             | 6.9833      | .15610     |
|                                                  |               | 95% Confidence Interval for Mean | Lower Bound | 6.6742     |
|                                                  |               |                                  | Upper Bound | 7.2924     |
|                                                  |               | 5% Trimmed Mean                  | 7.0370      |            |
|                                                  |               | Median                           | 7.0000      |            |
|                                                  |               | Variance                         | 2.924       |            |
|                                                  |               | Std. Deviation                   | 1.71000     |            |
|                                                  |               | Minimum                          | 2.00        |            |
|                                                  |               | Maximum                          | 10.00       |            |
|                                                  |               | Range                            | 8.00        |            |
|                                                  |               | Interquartile Range              | 2.00        |            |
|                                                  |               | Skewness                         | -.620       | .221       |
|                                                  |               | Kurtosis                         | .097        | .438       |
|                                                  | Manufacturing | Mean                             | 6.2353      | .13416     |
|                                                  |               | 95% Confidence Interval for Mean | Lower Bound | 5.9700     |
|                                                  |               |                                  | Upper Bound | 6.5006     |
|                                                  |               | 5% Trimmed Mean                  | 6.2696      |            |
|                                                  |               | Median                           | 6.0000      |            |
|                                                  |               | Variance                         | 2.448       |            |
|                                                  |               | Std. Deviation                   | 1.56459     |            |
|                                                  |               | Minimum                          | 2.00        |            |
|                                                  |               | Maximum                          | 10.00       |            |
|                                                  |               | Range                            | 8.00        |            |
|                                                  |               | Interquartile Range              | 2.75        |            |
|                                                  |               | Skewness                         | -.304       | .208       |
|                                                  |               | Kurtosis                         | -.135       | .413       |

|                                                  |               | Tests of Normality              |     |       |              |     |       |
|--------------------------------------------------|---------------|---------------------------------|-----|-------|--------------|-----|-------|
| What the building area is predominately used for |               | Kolmogorov-Smirnov <sup>a</sup> |     |       | Shapiro-Wilk |     |       |
|                                                  |               | Statistic                       | df  | Sig.  | Statistic    | df  | Sig.  |
| Group8PCA                                        | Office        | .191                            | 120 | <.001 | .936         | 120 | <.001 |
|                                                  | Manufacturing | .176                            | 136 | <.001 | .941         | 136 | <.001 |

a. Lilliefors Significance Correction

## Group8PCA Histograms

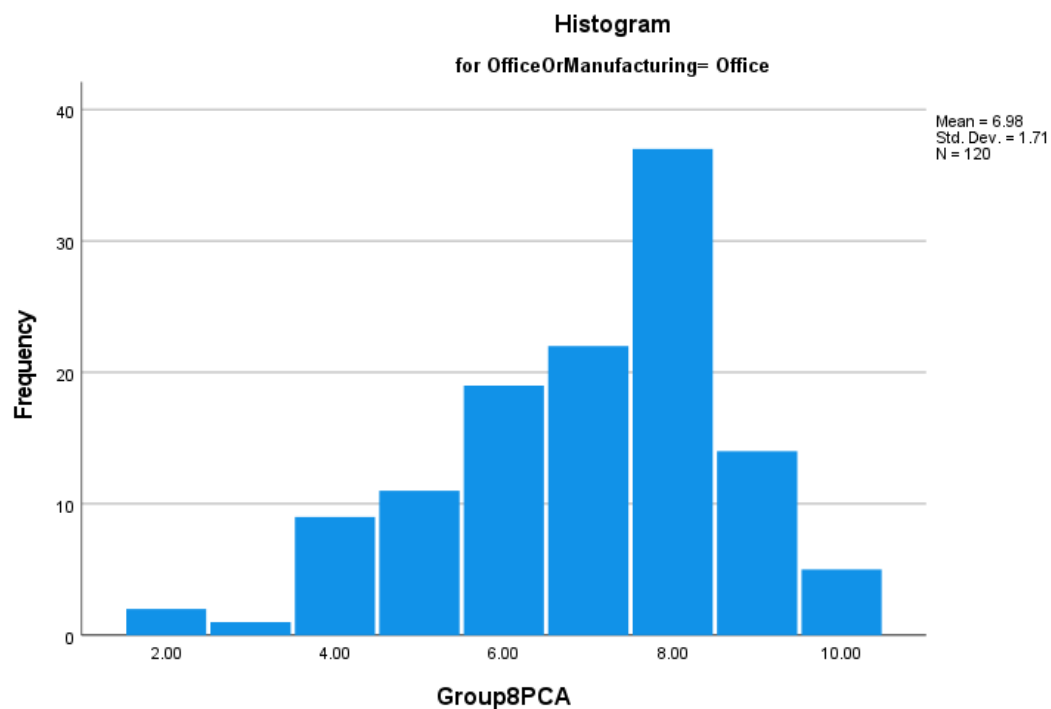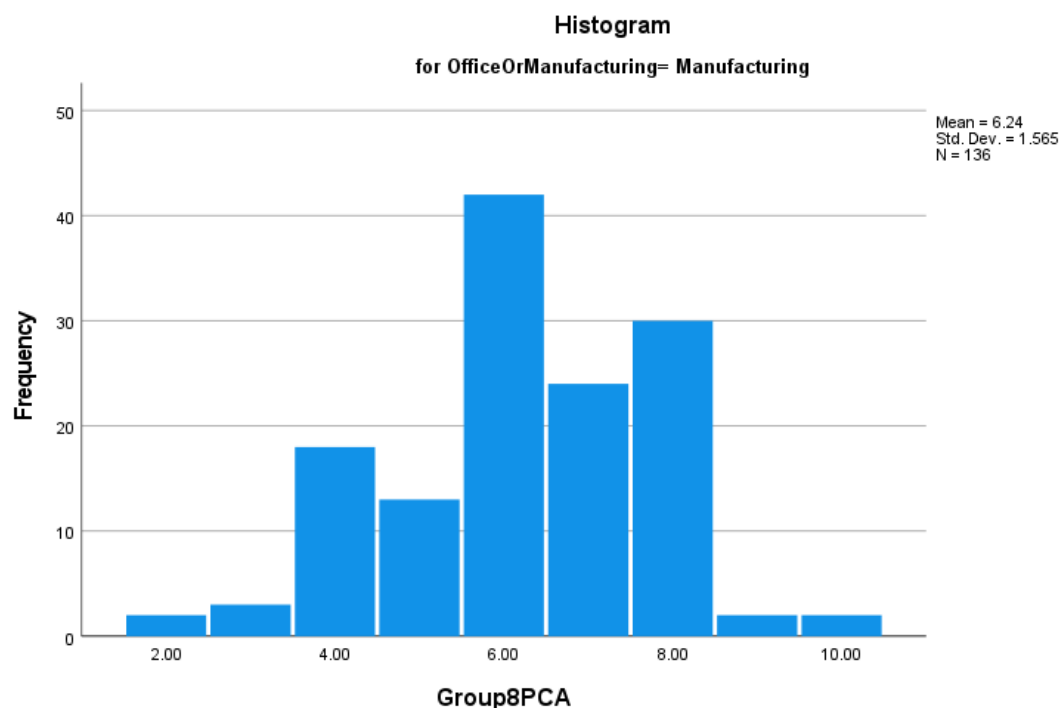

## Normal Q-Q Plots

Normal Q-Q Plot of Group8PCA  
for OfficeOrManufacturing= Office

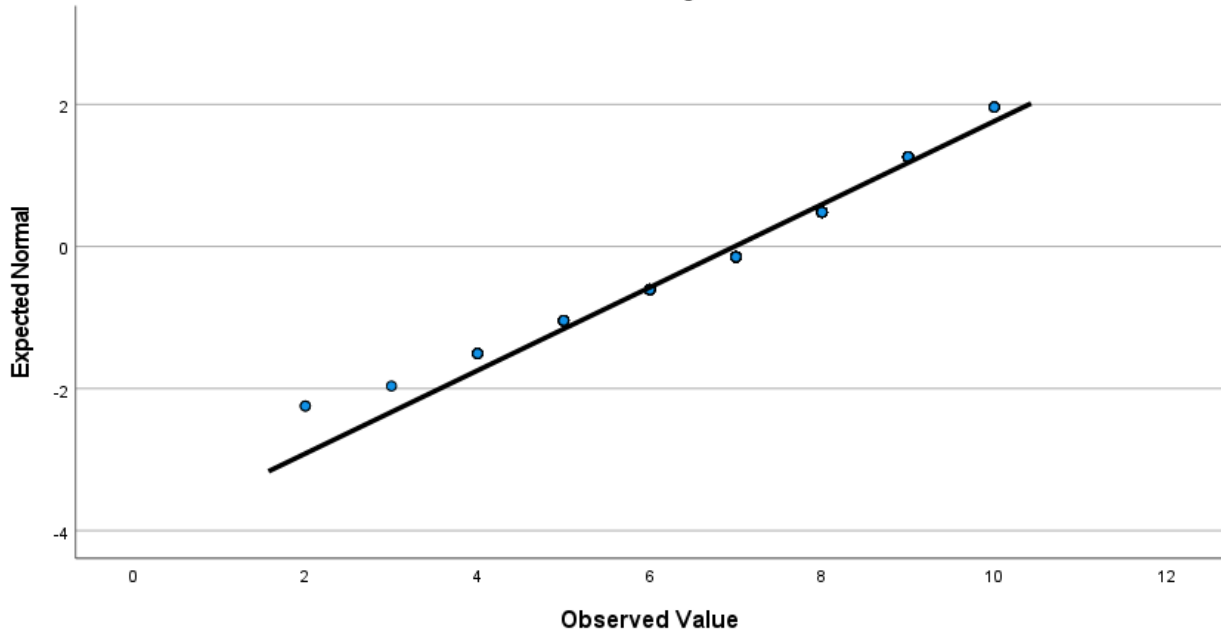

Normal Q-Q Plot of Group8PCA  
for OfficeOrManufacturing= Manufacturing

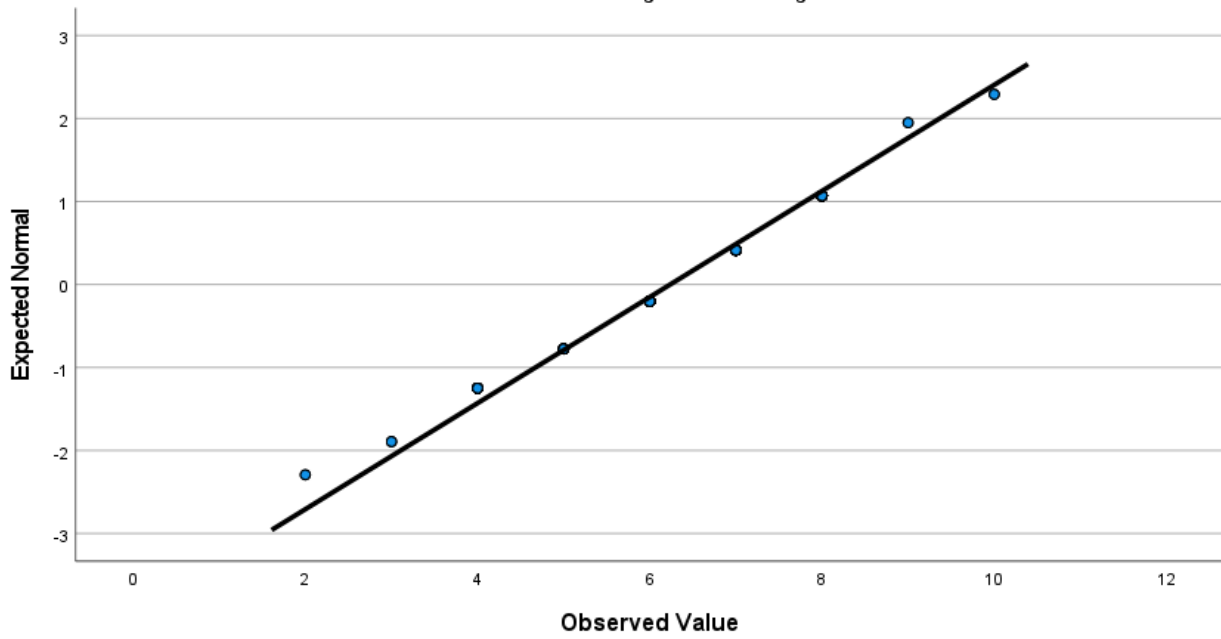

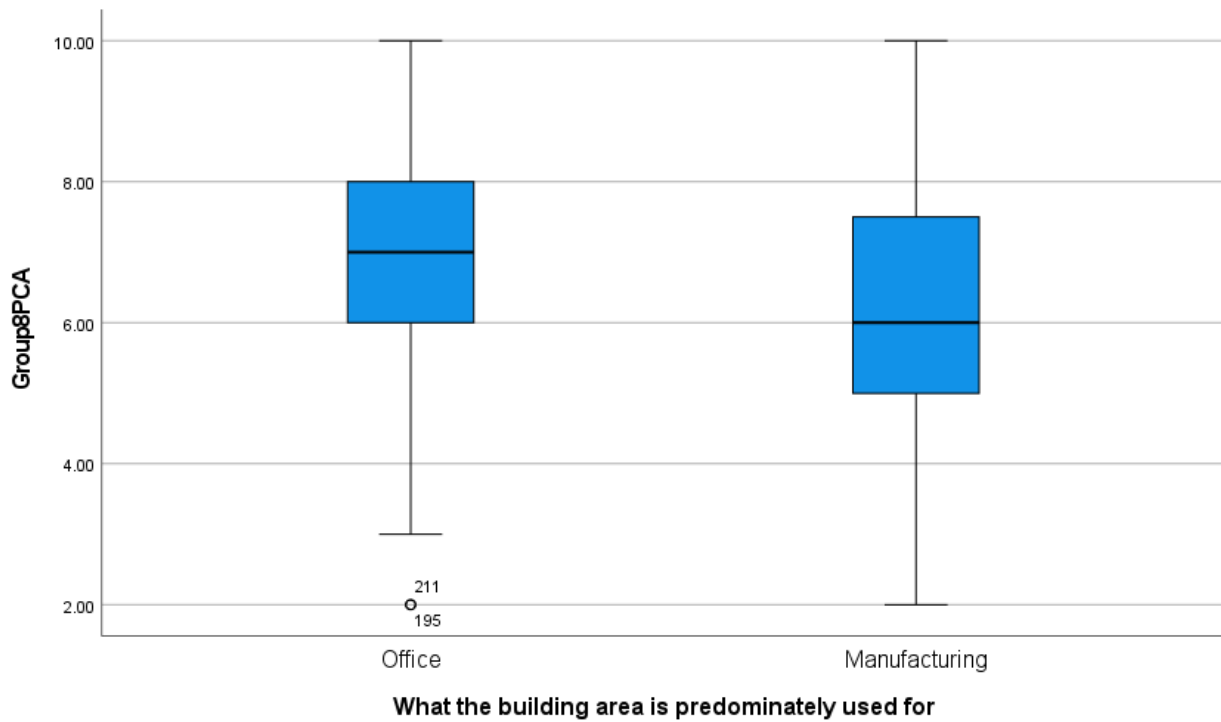

## T-Test

| Group Statistics                                 |               |     |        |                |                 |
|--------------------------------------------------|---------------|-----|--------|----------------|-----------------|
| What the building area is predominately used for |               | N   | Mean   | Std. Deviation | Std. Error Mean |
| Group8PCA                                        | Office        | 120 | 6.9833 | 1.71000        | .15610          |
|                                                  | Manufacturing | 136 | 6.2353 | 1.56459        | .13416          |

| Independent Samples Test                |                             |      |      |                              |         |                          |                          |                 |                       |                                                       |
|-----------------------------------------|-----------------------------|------|------|------------------------------|---------|--------------------------|--------------------------|-----------------|-----------------------|-------------------------------------------------------|
| Levene's Test for Equality of Variances |                             |      |      | t-test for Equality of Means |         |                          |                          |                 |                       |                                                       |
|                                         |                             | F    | Sig. | t                            | df      | Significance One-Sided p | Significance Two-Sided p | Mean Difference | Std. Error Difference | 95% Confidence Interval of the Difference Lower Upper |
| Group8PCA                               | Equal variances assumed     | .853 | .356 | 3.654                        | 254     | <.001                    | <.001                    | .74804          | .20469                | .34493 1.15115                                        |
|                                         | Equal variances not assumed |      |      | 3.634                        | 242.905 | <.001                    | <.001                    | .74804          | .20583                | .34260 1.15348                                        |

| Independent Samples Effect Sizes |                    |                           |                |                         |       |
|----------------------------------|--------------------|---------------------------|----------------|-------------------------|-------|
|                                  |                    | Standardizer <sup>a</sup> | Point Estimate | 95% Confidence Interval |       |
|                                  |                    |                           |                | Lower                   | Upper |
| Group8PCA                        | Cohen's d          | 1.63432                   | .458           | .209                    | .706  |
|                                  | Hedges' correction | 1.63917                   | .456           | .208                    | .704  |
|                                  | Glass's delta      | 1.56459                   | .478           | .225                    | .729  |

a. The denominator used in estimating the effect sizes.

Cohen's d uses the pooled standard deviation.

Hedges' correction uses the pooled standard deviation, plus a correction factor.

Glass's delta uses the sample standard deviation of the control group.

The above identifies 211 and 195 as outliers  
remove these and re-run test

What the building area is predominately used for

#### Case Processing Summary

| What the building area is<br>predominately used for |               | Valid |         | Cases<br>Missing |         | Total |         |
|-----------------------------------------------------|---------------|-------|---------|------------------|---------|-------|---------|
|                                                     |               | N     | Percent | N                | Percent | N     | Percent |
| Group8PCA                                           | Office        | 118   | 100.0%  | 0                | 0.0%    | 118   | 100.0%  |
|                                                     | Manufacturing | 136   | 100.0%  | 0                | 0.0%    | 136   | 100.0%  |

#### Descriptives

| What the building area is predominately used for |               | Statistic                        | Std. Error |
|--------------------------------------------------|---------------|----------------------------------|------------|
| Group8PCA                                        | Office        | Mean                             | 7.0678     |
|                                                  |               | 95% Confidence Interval for Mean |            |
|                                                  |               | Lower Bound                      | 6.7771     |
|                                                  |               | Upper Bound                      | 7.3585     |
|                                                  |               | 5% Trimmed Mean                  | 7.0932     |
|                                                  |               | Median                           | 7.0000     |
|                                                  |               | Variance                         | 2.542      |
|                                                  |               | Std. Deviation                   | 1.59448    |
|                                                  |               | Minimum                          | 3.00       |
|                                                  |               | Maximum                          | 10.00      |
|                                                  |               | Range                            | 7.00       |
|                                                  |               | Interquartile Range              | 2.00       |
|                                                  |               | Skewness                         | -.409      |
|                                                  |               | Kurtosis                         | -.449      |
|                                                  | Manufacturing | Mean                             | 6.2353     |
|                                                  |               | 95% Confidence Interval for Mean |            |
|                                                  |               | Lower Bound                      | 5.9700     |
|                                                  |               | Upper Bound                      | 6.5006     |
|                                                  |               | 5% Trimmed Mean                  | 6.2696     |
|                                                  |               | Median                           | 6.0000     |
|                                                  |               | Variance                         | 2.448      |
|                                                  |               | Std. Deviation                   | 1.56459    |
|                                                  |               | Minimum                          | 2.00       |
|                                                  |               | Maximum                          | 10.00      |
|                                                  |               | Range                            | 8.00       |
|                                                  |               | Interquartile Range              | 2.75       |
|                                                  |               | Skewness                         | -.304      |
|                                                  |               | Kurtosis                         | -.135      |

#### Tests of Normality

| What the building area is predominately used for |               | Kolmogorov-Smirnov <sup>a</sup> |     |       | Shapiro-Wilk |     |       |
|--------------------------------------------------|---------------|---------------------------------|-----|-------|--------------|-----|-------|
|                                                  |               | Statistic                       | df  | Sig.  | Statistic    | df  | Sig.  |
| Group8PCA                                        | Office        | .195                            | 118 | <.001 | .939         | 118 | <.001 |
|                                                  | Manufacturing | .176                            | 136 | <.001 | .941         | 136 | <.001 |

a. Lilliefors Significance Correction  
**Histograms**

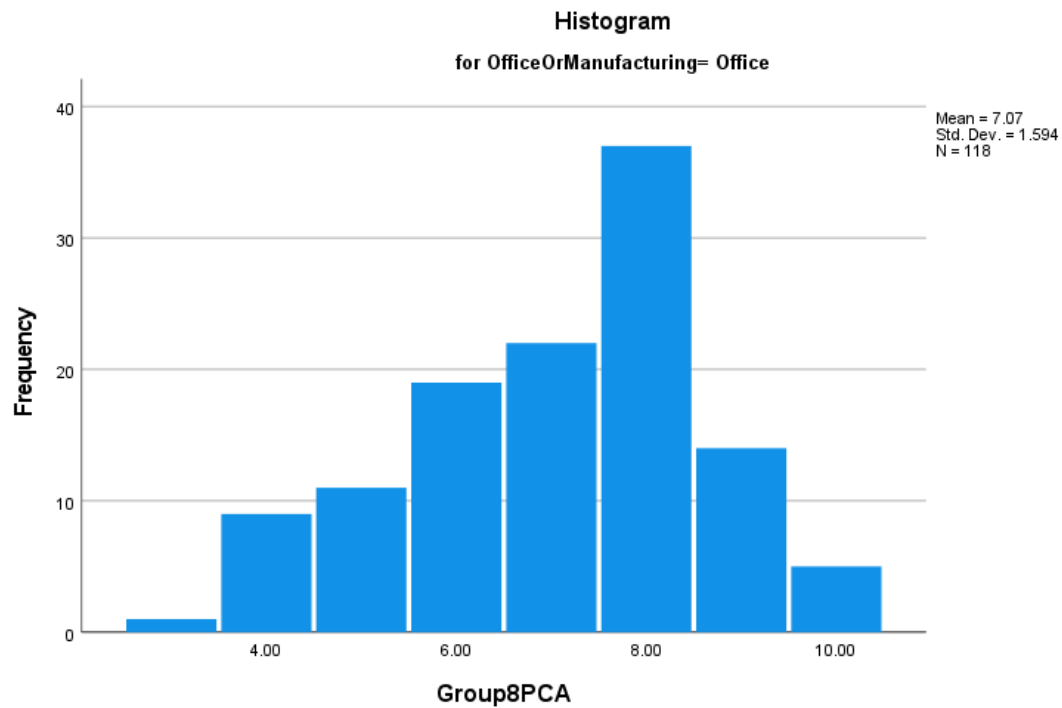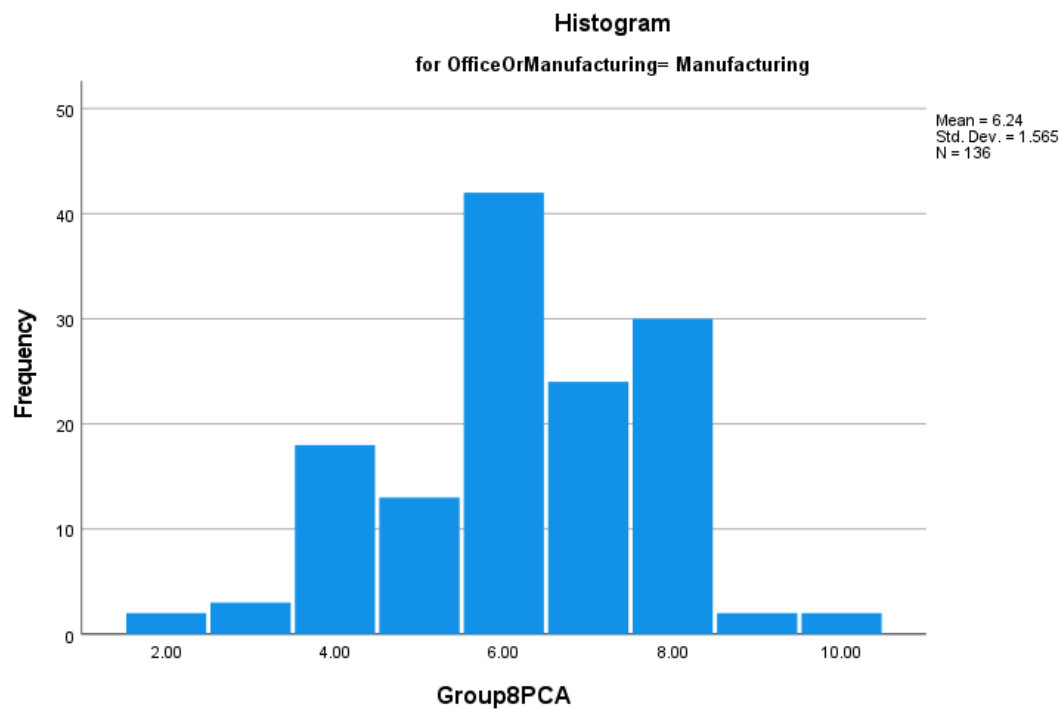

**Normal Q-Q Plots**



Normal Q-Q Plot of Group8PCA

for OfficeOrManufacturing= Office

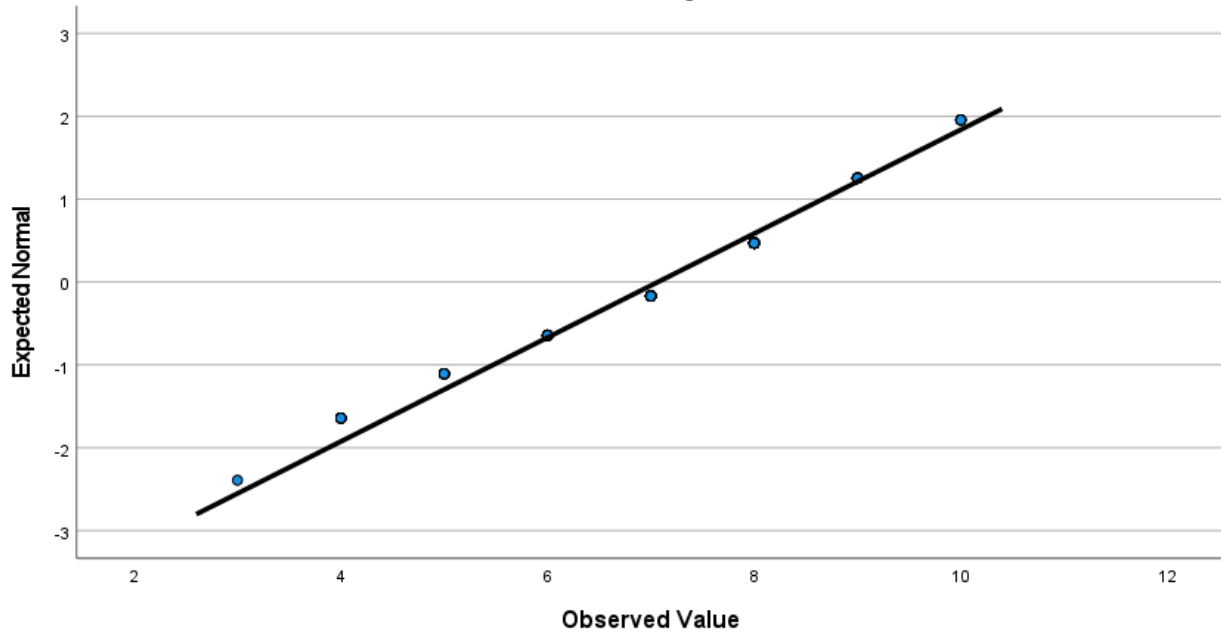

Normal Q-Q Plot of Group8PCA

for OfficeOrManufacturing= Manufacturing

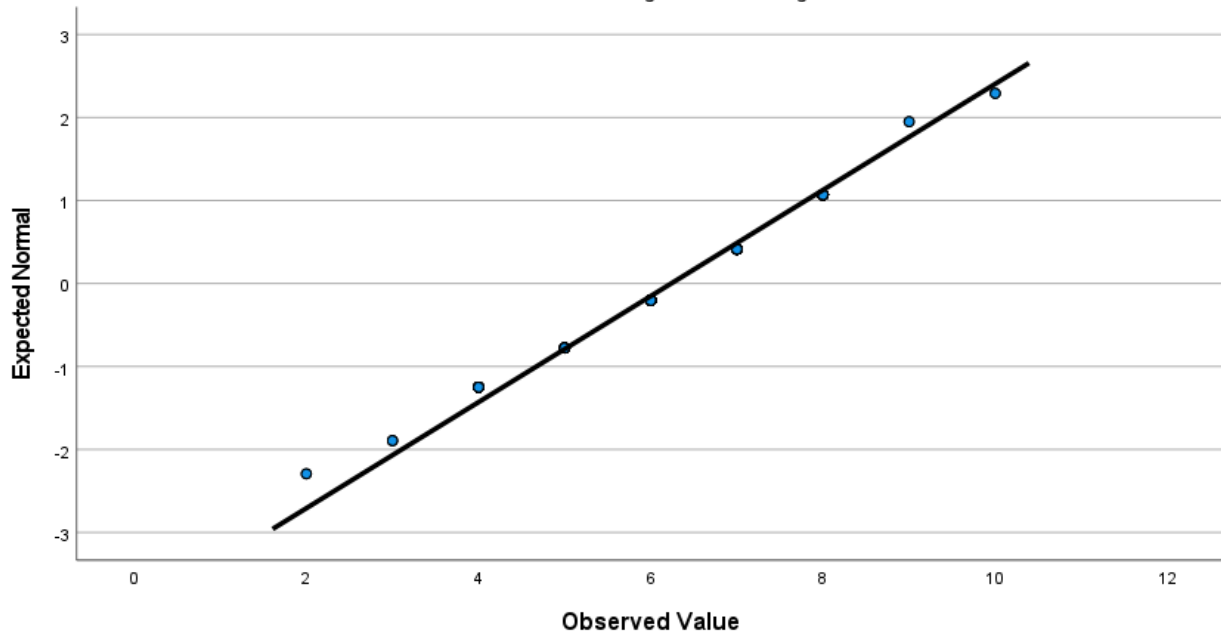

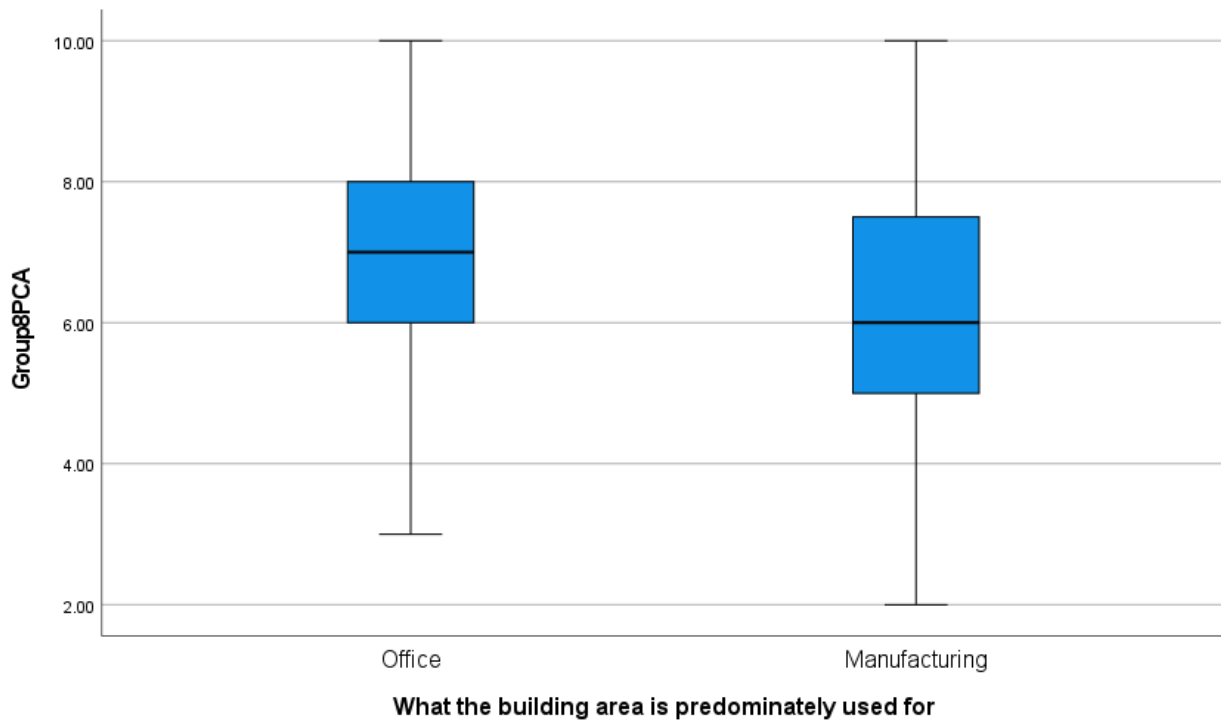

## T-Test

| Group Statistics                                 |               |     |        |                |                 |
|--------------------------------------------------|---------------|-----|--------|----------------|-----------------|
| What the building area is predominately used for |               | N   | Mean   | Std. Deviation | Std. Error Mean |
| Group8PCA                                        | Office        | 118 | 7.0678 | 1.59448        | .14678          |
|                                                  | Manufacturing | 136 | 6.2353 | 1.56459        | .13416          |

| Independent Samples Test                |                             |      |      |                              |         |              |             |                 |                       |                                           |         |
|-----------------------------------------|-----------------------------|------|------|------------------------------|---------|--------------|-------------|-----------------|-----------------------|-------------------------------------------|---------|
| Levene's Test for Equality of Variances |                             |      |      | t-test for Equality of Means |         |              |             |                 |                       | 95% Confidence Interval of the Difference |         |
|                                         |                             |      |      |                              |         | Significance |             |                 |                       |                                           |         |
|                                         |                             | F    | Sig. | t                            | df      | One-Sided p  | Two-Sided p | Mean Difference | Std. Error Difference |                                           |         |
| Group8PCA                               | Equal variances assumed     | .187 | .665 | 4.192                        | 252     | <.001        | <.001       | .83250          | .19859                | .44139                                    | 1.22361 |
|                                         | Equal variances not assumed |      |      | 4.186                        | 245.593 | <.001        | <.001       | .83250          | .19886                | .44082                                    | 1.22419 |

| Independent Samples Effect Sizes |                    |                           |                |                         |       |
|----------------------------------|--------------------|---------------------------|----------------|-------------------------|-------|
|                                  |                    | Standardizer <sup>a</sup> | Point Estimate | 95% Confidence Interval |       |
|                                  |                    |                           |                | Lower                   | Upper |
| Group8PCA                        | Cohen's d          | 1.57854                   | .527           | .276                    | .778  |
|                                  | Hedges' correction | 1.58325                   | .526           | .275                    | .775  |
|                                  | Glass's delta      | 1.56459                   | .532           | .277                    | .786  |

- a. The denominator used in estimating the effect sizes.
- Cohen's d uses the pooled standard deviation.
- Hedges' correction uses the pooled standard deviation, plus a correction factor.
- Glass's delta uses the sample standard deviation of the control group.

There are no longer any outliers in the data  
 Shapiro-wilk is significant which suggests data is not normally distributed, confirmed by box and whiskerplots and q-q plots.  
 Not appropriate to undertake independent t-test, explore other options such as mann-whitney test

**Conducted non-parametric testing - Mann-Whitney U test on all groups. As the above results show, we only need to report the results for groups 2, 3, 5, 6, 7, and 8 as these groups violated the assumption of normality.**

**Prior to reporting the Mann-Whitney U test, inspect the frequency charts to ensure that the data from the two groups has similar distributions.**

**Nonparametric Tests Results**

| Hypothesis Test Summary |                                                                                                                  |                                         |                     |                             |
|-------------------------|------------------------------------------------------------------------------------------------------------------|-----------------------------------------|---------------------|-----------------------------|
|                         | Null Hypothesis                                                                                                  | Test                                    | Sig. <sup>a,b</sup> | Decision                    |
| 1                       | The distribution of Group1PCA is the same across categories of What the building area is predominately used for. | Independent-Samples Mann-Whitney U Test | .034                | Reject the null hypothesis. |
| 2                       | The distribution of Group3PCA is the same across categories of What the building area is predominately used for. | Independent-Samples Mann-Whitney U Test | .128                | Retain the null hypothesis. |
| 3                       | The distribution of Group4PCA is the same across categories of What the building area is predominately used for. | Independent-Samples Mann-Whitney U Test | .675                | Retain the null hypothesis. |
| 4                       | The distribution of Group5PCA is the same across categories of What the building area is predominately used for. | Independent-Samples Mann-Whitney U Test | .041                | Reject the null hypothesis. |
| 5                       | The distribution of Group6PCA is the same across categories of What the building area is predominately used for. | Independent-Samples Mann-Whitney U Test | <.001               | Reject the null hypothesis. |
| 6                       | The distribution of Group7PCA is the same across categories of What the building area is predominately used for. | Independent-Samples Mann-Whitney U Test | <.001               | Reject the null hypothesis. |
| 7                       | The distribution of Group8PCA is the same across categories of What the building area is predominately used for. | Independent-Samples Mann-Whitney U Test | <.001               | Reject the null hypothesis. |
| 8                       | The distribution of Group2PCA is the same across categories of What the building area is predominately used for. | Independent-Samples Mann-Whitney U Test | <.001               | Reject the null hypothesis. |

- a. The significance level is .050.
- b. Asymptotic significance is displayed.

**Independent-Samples Mann-Whitney U Test**

**Group1PCA across What the building area is predominately used for**

| Independent-Samples Mann-Whitney U Test Summary |          |
|-------------------------------------------------|----------|
| Total N                                         | 256      |
| Mann-Whitney U                                  | 6908.000 |

|                               |           |
|-------------------------------|-----------|
| Wilcoxon W                    | 16224.000 |
| Test Statistic                | 6908.000  |
| Standard Error                | 589.983   |
| Standardized Test Statistic   | -2.122    |
| Asymptotic Sig.(2-sided test) | .034      |

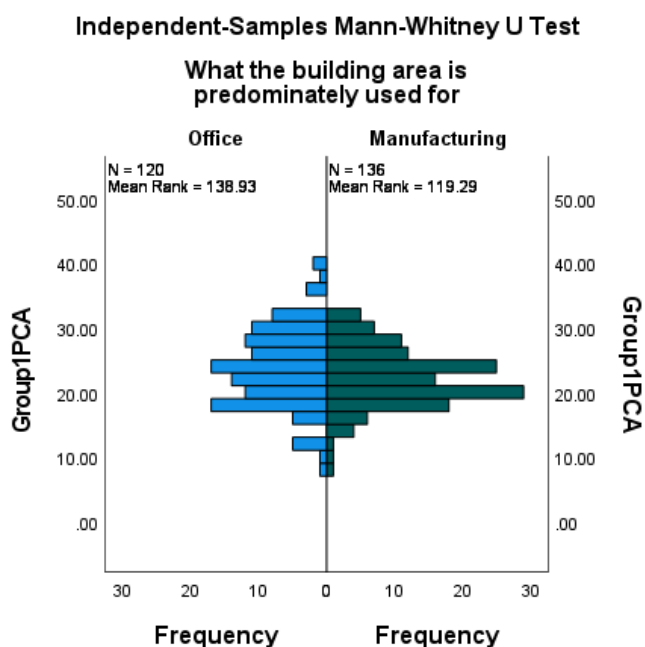

**Group3PCA across What the building area is predominately used for**

**Independent-Samples Mann-Whitney U Test Summary**

|                               |           |
|-------------------------------|-----------|
| Total N                       | 256       |
| Mann-Whitney U                | 7269.500  |
| Wilcoxon W                    | 16585.500 |
| Test Statistic                | 7269.500  |
| Standard Error                | 585.463   |
| Standardized Test Statistic   | -1.521    |
| Asymptotic Sig.(2-sided test) | .128      |

# Independent-Samples Mann-Whitney U Test

What the building area is predominately used for

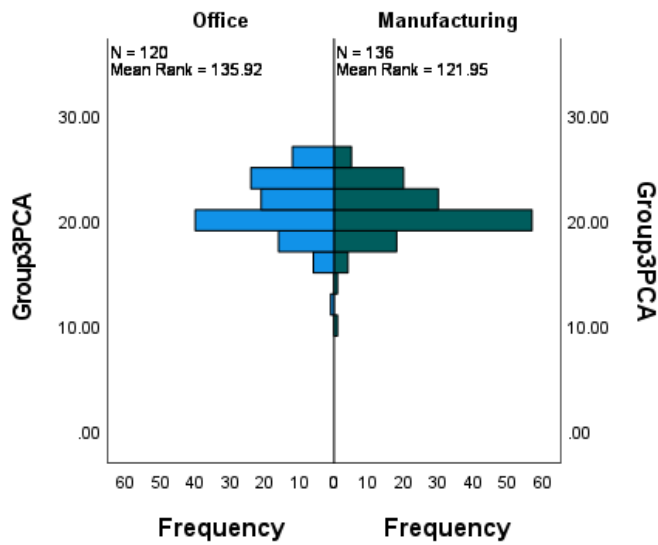

Group4PCA across What the building area is predominately used for

## Independent-Samples Mann-Whitney U Test Summary

|                               |           |
|-------------------------------|-----------|
| Total N                       | 256       |
| Mann-Whitney U                | 8407.000  |
| Wilcoxon W                    | 17723.000 |
| Test Statistic                | 8407.000  |
| Standard Error                | 589.349   |
| Standardized Test Statistic   | .419      |
| Asymptotic Sig.(2-sided test) | .675      |

## Independent-Samples Mann-Whitney U Test

What the building area is predominately used for

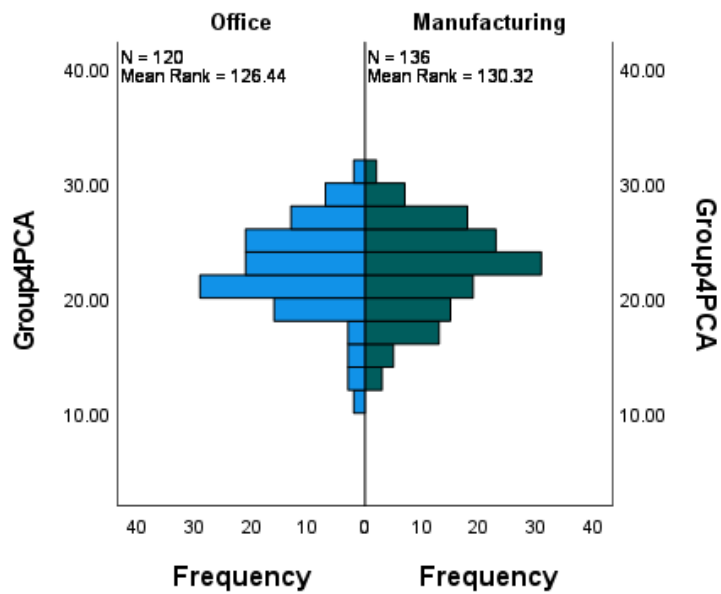

Group5PCA across What the building area is predominately used for

### Independent-Samples Mann-Whitney U Test Summary

|                               |           |
|-------------------------------|-----------|
| Total N                       | 256       |
| Mann-Whitney U                | 6966.000  |
| Wilcoxon W                    | 16282.000 |
| Test Statistic                | 6966.000  |
| Standard Error                | 584.472   |
| Standardized Test Statistic   | -2.043    |
| Asymptotic Sig.(2-sided test) | .041      |

# Independent-Samples Mann-Whitney U Test

What the building area is predominately used for

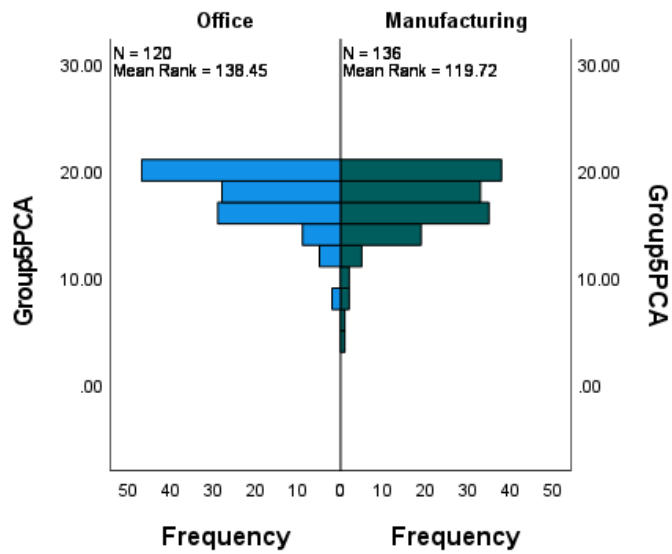

Group6PCA across What the building area is predominately used for

## Independent-Samples Mann-Whitney U Test Summary

|                               |           |
|-------------------------------|-----------|
| Total N                       | 256       |
| Mann-Whitney U                | 5846.500  |
| Wilcoxon W                    | 15162.500 |
| Test Statistic                | 5846.500  |
| Standard Error                | 582.519   |
| Standardized Test Statistic   | -3.972    |
| Asymptotic Sig.(2-sided test) | <.001     |

# Independent-Samples Mann-Whitney U Test

What the building area is predominately used for

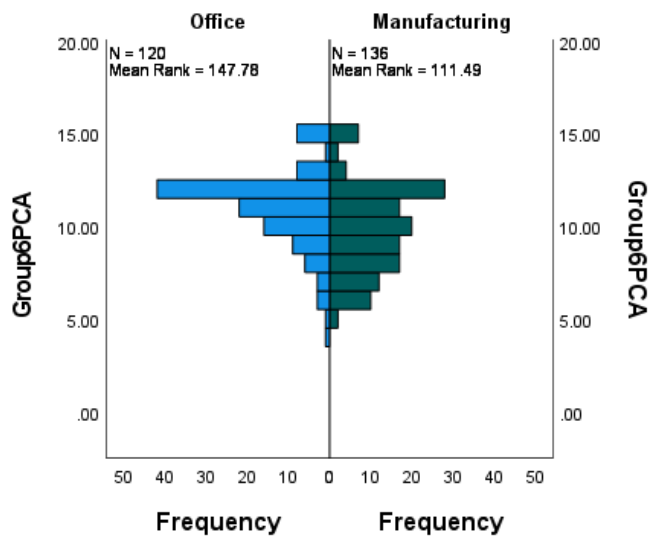

Group7PCA across What the building area is predominately used for

## Independent-Samples Mann-Whitney U Test Summary

|                               |           |
|-------------------------------|-----------|
| Total N                       | 256       |
| Mann-Whitney U                | 5365.000  |
| Wilcoxon W                    | 14681.000 |
| Test Statistic                | 5365.000  |
| Standard Error                | 587.442   |
| Standardized Test Statistic   | -4.758    |
| Asymptotic Sig.(2-sided test) | <.001     |



# Independent-Samples Mann-Whitney U Test

What the building area is predominately used for

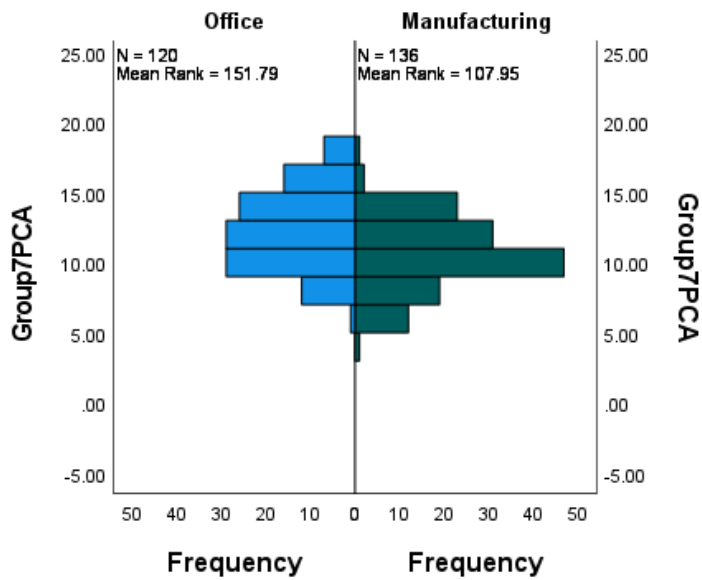

Group8PCA across What the building area is predominately used for

## Independent-Samples Mann-Whitney U Test Summary

|                               |           |
|-------------------------------|-----------|
| Total N                       | 256       |
| Mann-Whitney U                | 5935.000  |
| Wilcoxon W                    | 15251.000 |
| Test Statistic                | 5935.000  |
| Standard Error                | 579.405   |
| Standardized Test Statistic   | -3.840    |
| Asymptotic Sig.(2-sided test) | <.001     |

# Independent-Samples Mann-Whitney U Test

What the building area is predominately used for

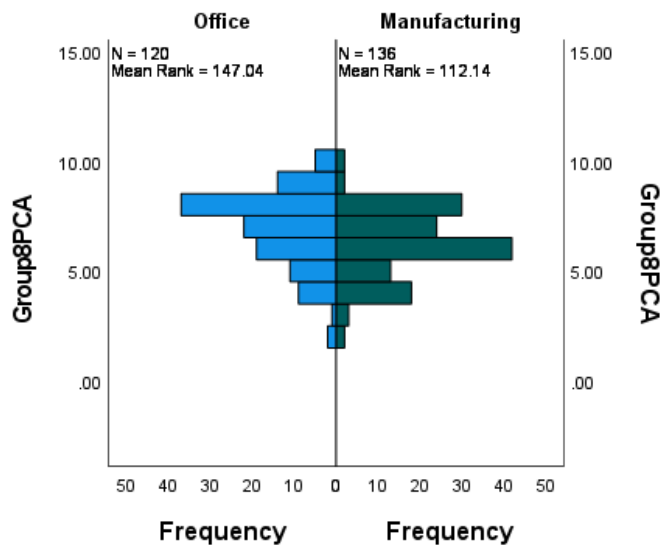

Group2PCA across What the building area is predominately used for

## Independent-Samples Mann-Whitney U Test Summary

|                               |           |
|-------------------------------|-----------|
| Total N                       | 256       |
| Mann-Whitney U                | 6049.500  |
| Wilcoxon W                    | 15365.500 |
| Test Statistic                | 6049.500  |
| Standard Error                | 585.883   |
| Standardized Test Statistic   | -3.602    |
| Asymptotic Sig.(2-sided test) | <.001     |

# Independent-Samples Mann-Whitney U Test

What the building area is predominately used for

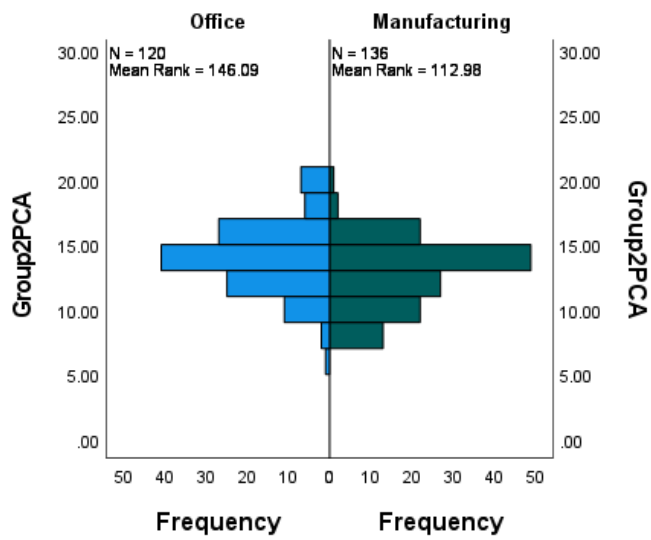

Supplement: s1 [file s1]
